# Supplementary material for: A lipid droplet-peroxisome network drives longevity by monounsaturated fatty acids via modulating ether lipid synthesis and ferroptosis
Source: Research Square preprint supplement (doi:10.21203/rs.3.rs-740521/v1), 2021-08-13
Supplement: Supplementary file 2 [file 1224bb1ec2db4d549e938c37.xlsx]

## Sheet: Sheet1
Extended Data Table 4 Worm strains
Strain name	Genotype	Function	Source	Backcrossed to N2
ABR161	hjIs37 [vha-6p::mRFP-SKL + Cbr-unc-119(+)]; ldrIs1 [dhs-3p::DHS-3::GFP + unc-76(+)]	Double marker strain with green intestinal lipid droplets and red intestinal peroxisomes	this work	6x
N2	Wild type	Wild type	Dr. Man-Wah Tan	NA
FX02100	tm2100	gpx-1 knockout strain	Mitani Lab	4x
LIU1	ldrIs1 [dhs-3p::DHS-3::GFP + unc-76(+)]	Intestinal lipid droplet marker strain	CGC	6x
LIU2	ldrIs2 [plinp::plin-1::mCherry + unc-76(+)]. Note: The plin-1 gene (W01A8.1) was formerly annotated mdt-28 in wormbase. We now use the current annotation of plin-1 for W01A8.1.	Intestinal and hypodermal lipid droplet marker strain	CGC	2x
VC3933	R01B10.6 (gk5008[loxP + myo-2p::GFP::unc-54 3’UTR + rps-27p::neoR::unc-54 3’UTR + loxP]) V	seip-1 knockout strain	CGC	2x
VS10	hjIs37 [vha-6p::mRFP-SKL + Cbr-unc-119(+)]	Red intestine peroxisome marker strain	CGC	6x
VS15	hjIs8 [ges-1p::GFP-SKL]	Green intestine Peroxisome marker strain	CGC	6x
WBM1177	wbmIs81[eft-3p::3XFLAG::GFP::SKL::unc-54 3'UTR, *wbmIs65]	Green ubiquitous peroxisome marker strain	WBM	6x to N2 WBM and 2x to N2 ABR
