# Supplementary material for: A lipid droplet-peroxisome network drives longevity by monounsaturated fatty acids via modulating ether lipid synthesis and ferroptosis
Source: Research Square preprint supplement (doi:10.21203/rs.3.rs-740521/v1), 2021-08-13
Supplement: Supplementary file 3 [file 1aee08d149934171c4b8f3ca.xlsx]

## Sheet: Sheet1
Extended Data Table 5 Primers used for RT-qPCR.
Name	Sequence 5’-3’	Reference
﻿act-1 F	CTC TTG CCC CAT CAA CCA TG	Han, S. et al. Mono-unsaturated fatty acids link H3K4me3 modifiers to C. elegans lifespan. Nature 544, 185-190, doi:10.1038/nature21686 (2017).
act-1 R	CTT GCT TGG AGA TCC ACA TC	Han, S. et al., Nature 544, 185-190, doi:10.1038/nature21686 (2017).
ash-2 F	CGC CTA TTA CCC GTC GAT T	Han, S. et al., Nature 544, 185-190, doi:10.1038/nature21686 (2017).1
ash-2 R	GTT TGT TCG TGT TGC TGC TC	Han, S. et al., Nature 544, 185-190, doi:10.1038/nature21686 (2017).1
lpin-1 F	CCGCCGAGTGTAACTTCCAT	This study
lpin-1 R	CCGAACACGAGACCCAATGA	This study
