# Supplementary material for: A lipid droplet-peroxisome network drives longevity by monounsaturated fatty acids via modulating ether lipid synthesis and ferroptosis
Source: Research Square preprint supplement (doi:10.21203/rs.3.rs-740521/v1), 2021-08-13
Supplement: Supplementary file 4 [file 227bed64f5083195c7fd8c66.xlsx]

## Sheet: Sheet1
Extended Data Table 6 Lipidomics Data
6 replicates per condition (ash-2 RNAi, Control, prx-5/ash-2 RNAi and prx-5 RNAi)
	Class	Fatty acid 1	Fatty acid 2	Fatty acid 3	Fatty acid 4	ash-2 RNAi #10	ash-2 RNAi #14	ash-2 RNAi #18	ash-2 RNAi #2	ash-2 RNAi #22	ash-2 RNAi #6	Control #1	Control #13	Control #17	Control #21	Control #5	Control #9	prx-5/ash-2 RNAi #11	prx-5/ash-2 RNAi #15	prx-5/ash-2 RNAi #19	prx-5/ash-2 RNAi #23	prx-5/ash-2 RNAi #3	prx-5/ash-2 RNAi #7	prx-5 RNAi #12	prx-5 RNAi #16	prx-5 RNAi #20	prx-5 RNAi #24	prx-5 RNAi #4	prx-5 RNAi #8
1	Cer	d17:0	22:00:00			19.0485	16.7083	14.5854	16.4693	17.056	19.1121	14.8373	15.1816	15.5823	16.6789	16.2413	19.3509	41.3534	43.0209	44.6472	49.9484	45.3981	43.2391	32.8754	33.1443	34.9738	30.3984	25.7647	32.1021
2	Cer	d17:0	23:00:00			4.99679	2.86726	4.40097	4.01281	3.89975	4.60721	4.02066	4.20712	4.2983	4.23976	5.14834	5.42182	14.7877	12.2904	13.9354	11.6131	20.4581	20.3667	18.5185	12.2991	9.27799	9.30961	6.18591	11.5143
3	Cer	d17:1	20:00:00			6.89061	6.06656	7.17768	6.50077	7.10074	8.00403	3.66607	6.29113	5.36666	6.14131	5.35048	6.69778	16.0715	18.6249	15.6427	22.0699	14.0123	13.6922	14.9717	15.2411	16.6042	16.4121	11.742	13.0273
4	Cer	d17:1	20:01:00			7.60129	5.49671	7.00248	7.95087	8.76022	8.27599	8.83331	10.0019	9.70429	9.41352	8.49909	8.72353	13.1883	13.4281	16.2737	14.9909	15.5818	14.1383	17.5172	18.5513	20.7107	19.714	15.9329	16.8339
5	Cer	d17:1	21:00:00			61.3471	61.6082	56.8276	57.0086	61.5815	67.0746	43.2274	51.622	49.4895	49.1675	55.6459	50.8587	143.421	155.97	164.882	158.232	152.231	163.12	151.89	143.542	152.547	152.116	130.254	146.184
6	Cer	d17:1	21:0+O			80.3523	80.8248	81.1438	80.5826	98.5769	93.3113	75.7489	93.1918	96.4958	96.5756	79.3256	86.4461	204.898	224.588	279.829	226.956	246.697	238.679	262.021	269.076	304.324	281.055	230.542	273.251
7	Cer	d17:1	21:01:00			59.2939	57.5843	59.3443	60.0837	69.3301	68.6247	55.3601	69.5265	69.1721	72.3375	59.5611	62.2908	150.362	164.028	193.65	173.262	174.96	172.813	193.408	198.201	211.801	201.61	174.468	194.859
8	Cer	d17:1	22:00:00			203.441	177.979	187.042	183.649	208.976	224.508	153.607	208.993	171.26	230.887	200.802	232.196	317.939	309.398	371.126	285.049	330.663	357.556	314.736	230.163	289.377	324.372	283.367	304.51
9	Cer	d17:1	22:0+O			291.78	301.407	294.04	283.494	327.632	314.709	347.933	382.704	374.658	401.471	338.185	371.733	552.822	603.765	708.817	620.723	608.691	596.672	615.58	672.892	705.493	720.797	556.877	605.423
10	Cer	d17:1	22:01:00			141.723	171.434	146.456	186.295	199.441	140.272	148.987	218.03	203.998	262.622	195.784	217.128	114.924	266.243	167.386	221.771	247.378	224.907	264.839	241.477	284.44	213.052	360.121	179.645
11	Cer	d17:1	23:00:00			33.6887	31.7095	31.9403	27.2634	33.2109	36.1875	26.1417	33.9725	29.8832	35.0775	32.4174	34.6873	84.8672	82.1359	96.8821	89.1448	87.8556	94.48	77.6525	73.1898	77.0001	79.7758	60.9807	76.797
12	Cer	d17:1	23:0+O			54.8118	54.3602	54.1433	52.4929	58.4056	58.429	54.695	66.5367	63.4661	69.2933	63.7464	64.5257	162.384	173.986	214.119	183.203	189.713	181.598	185.871	190.018	214.784	201.948	164.904	177.377
13	Cer	d17:1	23:01:00			45.6899	43.4678	45.0304	42.7852	48.0567	48.7892	43.9564	55.6971	52.9373	56.5811	53.3668	52.5016	135.667	140.911	169.399	147.806	154.48	157.423	160.539	151.352	170.035	163.449	131.69	154.185
14	Cer	d17:1	1 day, 0:00:00			15.5804	14.324	15.8297	12.4643	13.8045	16.2577	11.7542	13.3536	9.84356	13.2481	15.1635	18.4545	29.2972	32.5072	36.8164	38.2545	30.0219	30.6163	28.1414	34.8893	26.6594	33.588	21.1303	27.2952
15	Cer	d17:1	24:0+O			125.241	122.053	122.483	109.523	124.758	128.092	145.995	165.62	148.193	174.243	171.008	180.581	227.686	217.863	276.696	241.71	242.383	238.064	266.948	266.206	275.766	300.102	239.023	253.081
16	Cer	d17:1	1 day, 0:01:00			76.5841	41.0753	74.1526	69.7684	80.3033	78.6433	96.4071	105.479	87.5702	105.868	108.169	109.874	157.659	151.599	190.773	148.881	166.402	160.618	173.019	92.0665	195.151	214.757	153.468	177.366
17	Cer	d17:1	25:0+O			37.1473	35.9917	36.3902	36.1387	38.1164	48.1049	40.9783	48.3521	43.7786	49.3944	44.2032	45.9825	103.562	108.865	125.017	112.367	120.529	121.025	123.062	115.344	128.294	125.861	113.884	111.258
18	Cer	d17:1	1 day, 1:01:00			25.6024	25.2966	24.9418	24.2593	26.5816	30.1077	30.3693	17.0785	29.0653	31.7932	30.7691	31.9493	74.9797	42.9512	91.6067	78.5983	86.7004	82.4531	83.8428	83.2714	90.7993	89.3606	73.3667	42.48
19	Cer	d17:1	26:0+O			24.0286	24.2086	23.4925	24.0561	25.3548	28.6107	29.3704	30.4107	28.1317	17.2269	31.3431	30.2877	48.0457	50.4068	59.4007	51.5669	58.7334	54.3067	55.406	48.8882	58.6938	57.5279	47.9277	49.3261
20	Cer	d17:1	1 day, 2:01:00			7.4366	14.7548	7.63065	7.73952	7.6732	12.7446	6.25937	8.44609	8.42262	8.57373	8.02868	9.10607	12.1069	14.0454	19.2434	13.1953	15.0066	34.9962	25.8298	31.3728	26.9641	16.3198	17.3511	32.7824
21	Cer	t17:0	21:0+O			15.0356	15.1394	15.1671	13.0107	16.5029	16.9169	14.3938	18.7875	17.4206	18.301	17.301	18.3296	80.23	72.4059	96.2949	82.2984	85.3141	87.7473	69.1712	70.515	70.2669	70.8318	51.6711	70.7112
22	Cer	t17:0	22:0+O			93.4355	98.9019	93.6334	63.502	105.728	103.222	79.4038	104.264	81.1151	102.7	96.6989	97.0614	301.041	292.084	352.213	284.792	310.773	313.873	225.267	253.906	228.033	257.438	191.388	256.73
23	Cer	t17:0	24:0+O			35.4987	34.517	33.0056	34.2526	32.5587	38.9162	43.2126	45.0733	38.3973	42.4418	44.2173	46.0144	146.087	127.652	153.879	129.146	127.626	132.056	124.913	108.14	101.982	101.949	94.4193	101.099
24	Cer	t17:0	25:0+O			10.7576	10.3952	13.9208	8.36793	8.49039	10.5898	8.18728	12.8445	9.71224	11.1149	14.7926	13.5366	62.1178	49.4675	59.3477	57.5462	54.2371	58.9432	51.32	53.9981	40.5278	40.0706	30.6293	45.014
25	CL	15:00:00	20:04:00	20:04:00	20:03:00	1.15307	1.48775	0.909462	1.0343	1.4413	1.19058	2.44235	2.46574	2.30768	1.66743	3.76785	1.94966	1.43019	1.96616	1.9717	1.45827	2.11428	2.52539	1.75202	2.09148	0.0585743	1.91167	1.4617	1.95843
26	CL	17:01:00	20:04:00	20:04:00	20:04:00	3.6319	3.00473	2.24511	2.7501	2.20199	2.5705	3.83769	3.38581	3.29851	2.60175	4.10198	3.72573	3.22499	3.62155	3.24775	3.60861	4.97001	5.89129	4.26714	3.9112	4.43811	3.03001	2.4461	4.07293
27	CL	18:02:00	18:00:00	18:00:00	22:00:00	3.09194	2.82167	2.60194	2.78264	3.62094	2.78167	5.88334	6.1889	6.88884	6.23172	5.76377	6.77884	8.01144	9.0009	9.01582	8.04583	9.86807	9.58046	9.82924	9.7794	10.6052	9.76411	5.46039	10.2485
28	CL	18:02:00	20:03:00	18:02:00	20:03:00	6.79133	6.91467	6.33829	6.51799	6.83607	6.74509	11.7151	10.2454	8.15759	8.28865	12.0893	12.2741	4.07731	4.71332	5.41678	4.29762	5.23084	6.40839	6.06391	6.81848	8.21938	6.24165	4.96332	7.41939
29	CL	18:03:00	18:01:00	20:04:00	18:02:00	1.52734	1.80747	1.73237	1.55857	1.41415	1.59887	2.65469	3.43417	2.74298	2.16239	3.74178	3.78775	1.1029	1.45251	1.37063	1.12222	1.49838	1.7445	1.80948	1.65472	2.07696	1.73021	1.54045	1.97877
30	CL	18:03:00	20:04:00	20:03:00	18:02:00	8.6668	9.19949	8.4005	8.79508	8.72004	8.94931	18.2091	17.991	17.6997	15.3085	22.6725	21.0345	7.61825	12.029	13.6008	10.7887	10.8461	12.5588	12.0275	11.1443	16.8791	13.8494	8.9519	13.0523
31	CL	18:03:00	20:04:00	20:04:00	18:02:00	4.99569	5.71915	5.1712	5.42077	5.03449	5.26208	11.1127	11.1432	11.27	9.60251	13.4146	11.896	5.48917	8.02721	9.36984	6.30173	9.35833	9.77242	8.61798	7.38836	9.13814	8.49623	4.91535	7.98236
32	CL	20:03:00	20:03:00	18:01:00	20:04:00	9.51361	11.1644	8.97841	9.47162	10.3157	10.2054	14.0269	14.4516	15.0092	10.4494	16.3873	14.304	11.1348	15.8204	20.8658	18.002	19.5993	18.9619	16.938	17.6078	18.0856	15.9437	10.1512	17.4772
33	CL	20:04:00	20:03:00	20:03:00	20:03:00	20.9521	24.5708	19.6916	21.3957	21.5712	22.1378	33.4979	33.3691	38.6235	27.1511	35.3828	32.6054	47.6426	56.0565	60.1978	52.8919	67.8983	60.984	47.2481	47.7387	53.6148	44.8798	31.5329	47.6922
34	CL	20:04:00	20:03:00	20:03:00	20:04:00	40.3922	41.5261	35.7164	37.9711	38.4531	38.9374	69.5239	64.5619	67.783	52.3276	69.2405	64.4861	72.9822	89.031	90.5393	78.676	97.495	90.8782	73.9746	73.8687	82.2244	68.108	49.1158	71.4327
35	CL	20:04:00	20:03:00	20:04:00	18:02:00	24.3001	26.0077	22.136	23.3408	24.5412	23.0798	44.5585	40.9859	41.1814	35.0496	48.1938	44.1984	21.9731	36.9227	31.9465	26.8759	33.7328	36.0852	26.8032	27.2561	34.1895	34.1291	17.8735	33.2222
36	CL	20:04:00	20:03:00	20:04:00	20:04:00	41.3897	43.1897	37.2051	39.748	39.0979	39.8551	79.8938	69.5995	71.8383	58.3478	77.2629	72.0584	67.1673	76.3503	84.0276	73.4554	91.1856	83.4917	70.753	71.1024	80.7612	68.1227	46.8074	69.404
37	CL	20:04:00	20:04:00	20:04:00	20:04:00	22.2481	23.2776	21.3212	21.3957	23.1344	21.3527	47.7187	40.4418	43.995	35.2964	44.2285	41.5416	31.9786	41.5112	43.4499	37.4344	44.238	41.1415	36.8652	39.5891	44.0202	38.1838	24.122	36.2339
38	CL	20:05:00	15:01:00	18:00:00	1 day, 0:01:00	2.67146	3.38324	3.49964	3.37035	3.51857	3.14659	8.31605	8.60317	9.06077	8.9297	9.51679	8.60122	2.85863	3.76597	4.83066	3.45573	2.21202	3.51776	4.36144	5.22274	6.79278	5.4902	3.63423	4.36869
39	CL	20:05:00	20:03:00	20:04:00	18:02:00	18.6841	18.9669	17.5187	18.605	18.445	18.6837	39.8182	35.908	37.8562	31.1004	42.3983	39.851	31.1437	40.8016	43.2375	27.5306	33.702	33.826	29.4955	31.9749	36.3411	30.7532	26.5923	30.045
40	CL	20:05:00	20:04:00	18:02:00	20:04:00	1.39498	1.32081	1.15281	1.34084	1.32932	1.14606	2.45967	1.8068	3.0099	2.44252	3.85776	3.43735	1.93136	1.15877	1.41967	1.84442	2.31473	2.43774	1.42693	2.38381	2.77621	2.10384	1.14532	2.38883
41	CL	20:05:00	20:04:00	20:04:00	20:04:00	4.16013	4.68341	7.27218	4.42359	4.81365	6.3044	17.5622	11.4864	9.27365	7.40058	16.564	8.0308	10.8721	11.2195	15.2305	7.94223	7.39978	15.1278	6.89679	6.39088	8.89911	13.1464	7.16903	13.7494
42	CL	20:05:00	22:03:00	1 day, 0:01:00	15:00:00	1.01938	0.941486	0.935632	0.864638	0.816262	0.935626	1.72136	2.04712	1.78473	1.88872	1.97823	2.10265	1.86366	2.1349	2.15619	1.74993	0.610185	2.26159	1.93922	1.64594	2.17077	1.92504	0.682837	1.82724
43	CL	20:05:00	22:06:00	20:03:00	20:04:00	4.74152	5.42513	4.8869	4.58315	4.68589	4.44017	11.4425	7.736	9.36676	7.02034	9.47714	8.66081	13.0878	11.3552	13.1885	10.7194	14.0014	16.0407	10.5852	10.7585	10.7541	9.90388	4.96119	10.0017
44	CL	22:06:00	20:03:00	20:03:00	20:04:00	3.4624	4.42096	3.21878	3.46222	3.65493	3.29973	7.12	5.35373	6.31543	4.05777	6.38695	6.06829	7.59079	9.70037	11.9157	10.7195	14.0745	9.86447	9.39797	9.59177	11.0314	8.921	5.21363	9.20438
45	CL	22:06:00	20:04:00	20:03:00	20:04:00	5.02495	5.83035	4.7507	4.31763	5.34057	4.26814	10.3886	7.4966	9.15209	7.08181	9.63031	9.0008	11.2635	13.8276	14.5789	12.5843	16.0144	14.4505	10.737	12.6263	11.7467	11.0244	6.3014	11.9794
46	CL	23:00:00	15:00:00	18:00:00	18:02:00	2.15755	2.18574	1.608	2.03485	2.48231	1.75278	4.90139	4.58479	4.25852	4.1838	5.13048	5.89273	11.2044	11.3831	10.4711	9.77548	11.6329	11.062	21.5118	25.2627	23.658	22.9915	11.4365	18.321
47	CL	1 day, 0:00:00	18:01:00	20:00:00	20:03:00	7.93342	8.24773	7.82873	6.51027	8.53102	6.55792	15.9646	12.2281	12.665	12.1076	17.1675	14.3074	62.4695	61.1845	79.0422	70.0578	78.2615	74.6486	60.6405	66.3592	67.4488	65.7549	30.772	62.5845
48	DG	14:00:00	18:02:00			37.4429	36.2886	22.0692	25.9798	26.3861	32.9908	30.8721	20.7603	17.8031	24.3116	23.5444	23.5232	10.5081	20.8922	10.9077	18.701	32.051	15.2708	8.40681	27.228	10.258	27.8748	16.2844	22.2256
49	DG	15:00:00	17:00:00			12.864	11.4134	13.1915	15.9967	13.9791	16.1207	13.1978	13.5475	14.2913	13.789	13.8341	11.5012	23.1881	22.8003	27.8046	24.1985	25.0711	19.9239	24.5131	25.2006	28.3396	28.4895	24.2848	27.6007
50	DG	15:00:00	18:02:00			181.734	170.916	179.865	193.679	187.128	174.828	171.372	184.163	185.878	184.321	182.576	167.953	80.272	124.362	103.695	98.3268	95.4074	95.1095	136.685	149.62	160.185	138.398	122.138	166.128
51	DG	15:00:00	20:02:00			172.895	185.141	2.03298	207.215	211.252	174.516	199.113	164.435	216.818	209.421	5.86145	175.602	414.843	466.213	504.404	432.73	471.265	452.025	565.109	592.705	632.975	568.629	632.318	594.066
52	DG	15:00:00	20:04:00			43.8099	45.0298	48.1745	45.208	21.8185	48.944	37.325	38.9763	46.044	41.7071	48.8874	36.4716	45.9614	50.3552	61.6829	55.6168	53.7394	51.0125	55.319	40.5936	63.1941	57.7755	56.2468	58.8907
53	DG	15:00:00	20:05:00			207.101	202.349	203.496	209.365	203.483	193.113	186.282	206.616	208.501	212.231	218.635	174.224	170.259	187.382	207.479	175.715	194.329	180.962	183.946	193.515	197.23	185.518	195.03	193.601
54	DG	16:00:00	20:05:00			227.843	187.751	181.838	203.759	281.626	188.073	178.665	177.865	158.923	165.439	176.126	155.784	100.461	115.855	115.696	100.238	111.937	155.036	81.004	80.9979	85.0417	78.7898	92.8562	88.3333
55	DG	16:01:00	18:01:00			72.9159	69.9977	76.8567	84.2172	78.6734	76.4983	49.8456	53.1485	56.3636	52.4062	51.4744	46.3118	22.3156	21.6469	27.2261	25.5048	33.9923	1.64346	28.5442	18.7917	31.7881	20.4257	28.5737	25.6077
56	DG	16:01:00	20:05:00			83.637	75.5247	76.4147	82.2638	86.7448	77.0785	73.6227	64.3318	65.7358	68.104	64.8437	60.8734	40.6776	47.3034	57.9446	41.5753	66.6697	50.3884	45.5807	40.7048	49.9113	52.8283	47.3818	39.9808
57	DG	17:00:00	17:00:00			6.14508	7.44713	2.56948	8.23943	8.63854	7.7151	10.0983	8.14178	0.665274	8.51549	9.58827	7.56523	24.2643	28.3732	2.26513	23.0127	24.3694	25.04	23.8262	27.5979	27.3771	30.34	24.2713	29.139
58	DG	17:01:00	17:00:00			193.468	178.91	188.366	193.113	186.306	186.649	155.495	161.922	173.423	163.616	164.065	153.422	170.893	195.944	226.839	196.901	205.313	214.966	166.908	165.977	185.757	166.358	180.186	175.562
59	DG	17:01:00	18:02:00			456.047	434.172	436.861	450.489	439.469	431.21	454.707	535.358	499.451	522.071	505.259	472.289	285.682	330.519	378.041	313.023	329.41	318.962	321.854	413.956	365.041	366.941	377.437	393.794
60	DG	17:01:00	20:03:00			212.815	178.119	151.764	188.376	157.886	199.728	141.996	407.71	175.533	177.043	405.074	342.206	281.455	309.536	364.251	389.237	399.054	329.844	237.631	204.173	33.2158	227.271	266.427	319.001
61	DG	17:01:00	20:04:00			504.877	405.48	649.538	453.472	659.086	457.664	423.01	423.87	715.52	618.678	730.201	555.065	1042.05	1162.1	1245.6	1034.72	1399.03	1217.76	1030.59	981.642	1029.67	946.615	1191.83	1074.33
62	DG	17:01:00	20:05:00			565.673	518.632	516.557	512.401	492.12	517.987	492.564	535.787	529.9	558.963	563.159	477.133	390.981	464.215	474.347	404.213	473.701	469.856	381.872	380.189	400.698	370.782	398.851	396.806
63	DG	18:00:00	17:00:00			9.20267	9.93127	12.4693	8.89141	10.0261	8.53418	12.2276	10.7853	9.49041	9.52371	8.64303	6.28495	42.2264	43.2135	49.6911	44.3621	56.9698	45.5679	39.3238	47.9643	45.9042	51.6442	40.5393	46.6216
64	DG	18:00:00	18:01:00			145.009	139.78	145.754	143.845	151.548	148.552	125.466	140.292	134.222	130.494	136.639	127.602	256.192	283.539	335.043	278.058	306.009	296.728	224.833	275.349	279.361	234.528	263.018	271.493
65	DG	18:00:00	18:02:00			294.075	293.322	276.639	288.863	299.664	307.818	259.26	305.787	289.371	268.998	284.915	267.369	431.27	489.711	516.131	437.104	459.774	454.856	536.423	583.197	555.571	577.077	568.317	561.233
66	DG	18:00:00	20:02:00			19.1643	19.2753	20.1039	18.548	19.826	20.8183	16.3851	19.107	16.7058	15.7288	19.8464	15.5935	30.1375	38.604	39.4222	35.1003	33.0955	35.3925	45.1314	49.8336	48.0932	30.8851	46.5158	64.5582
67	DG	18:00:00	20:03:00			84.4633	79.5259	74.7501	74.2451	70.5016	89.3276	55.414	71.9097	64.6303	60.096	70.6506	53.1383	282.679	295.62	372.119	326.383	366.91	338.437	233.345	231.87	248.167	232.437	263.464	247.805
68	DG	18:00:00	20:04:00			262.452	236.407	253.842	233.311	232.532	294.627	183.153	205.451	180.632	133.64	206.405	181.523	631.803	728.856	783.878	615.658	836.323	756.789	531.826	517.044	568.732	503.62	646.719	563.222
69	DG	18:00:00	20:05:00			842.435	796.218	783.168	815.485	812.884	847.403	738.458	880.508	811.974	786.187	835.783	785.626	1403.8	1675.51	1650.39	1368.69	1735.96	1559.69	1376.73	1328.21	1441.41	1236.64	1544.21	1371.36
70	DG	18:01:00	18:01:00			435.004	416.651	462.622	451.295	428.29	396.711	341.671	380.193	345.971	323.264	305.953	317.973	54.4647	80.3302	84.4243	64.7701	91.4031	67.8916	73.0809	54.2003	77.6817	55.9422	86.7122	56.1561
71	DG	18:01:00	18:02:00			592.985	589.419	572.115	665.443	606.121	585.462	513.462	651.361	593.834	580.341	526.023	536.139	108.735	153.838	137.06	115.19	132.303	99.3399	222.692	207.093	253.209	208.584	282.666	202.219
72	DG	18:01:00	18:03:00			363.335	342.139	354.228	404.479	359.369	215.238	308.671	392.204	389.688	372.991	366.172	366.245	214.893	97.9982	92.1511	278.582	278.696	243.056	218.166	76.8116	208.314	236.123	233.631	224.57
73	DG	18:01:00	20:03:00			340.677	344.775	332.164	344.563	352.773	339.559	271.107	312.179	312.683	295.564	310.215	270.171	202.752	233.636	282.954	222.582	291.287	243.925	224.348	214.424	244.677	217.984	239.269	221.301
74	DG	18:01:00	20:04:00			634.372	602.665	566.543	636.813	620.648	636.261	450.448	567.132	546.663	487.314	509.644	458.015	125.905	409.363	451.104	164.789	473.122	371.452	142.044	133.917	171.874	143.127	155.519	181.829
75	DG	18:01:00	20:05:00			1160.13	1114.65	1096.2	1131.82	1309.27	1089.98	1092.17	1099.94	1178	1035.14	1077.46	904.793	537.516	642.66	810.266	456.955	649.77	458.56	473.433	506.011	751.546	651.169	748.737	681.093
76	DG	18:02:00	20:04:00			104.95	104.346	100.588	94.6997	99.0165	103.027	112.234	124.488	116.233	115.143	121.251	111.763	79.7858	111.532	115.956	102.479	118.826	94.9875	142.85	122.539	147.179	132.736	145.958	126.59
77	DG	18:03:00	20:05:00			176.117	165.006	161.404	155.999	156.425	156.815	173.259	177.274	164.477	179.754	169.399	163.194	138.364	159.901	180.351	152.16	174.126	158.318	149.437	144.556	154.276	149.274	143.053	147.654
78	DG	19:01:00	18:00:00			24.0072	22.6484	34.4855	30.1075	25.408	25.0492	19.6629	36.1674	22.4139	32.8604	28.8513	32.1302	105.316	111.473	131.399	108.704	118.495	118.979	121.438	105.618	98.9801	118.894	100.734	143.717
79	DG	19:01:00	18:01:00			221.943	215.572	217.428	219.15	226.306	209.736	183.872	237.2	223.952	212.126	221.264	192.759	212.528	259.679	294.351	229.896	268.005	310.681	268.164	273.227	287.199	269.333	292.209	295.916
80	DG	19:01:00	19:01:00			38.8882	39.0615	38.7631	35.3407	41.9851	41.7193	38.6421	46.5579	47.2603	46.1116	57.077	45.5355	140.953	146.09	162.787	132.641	201.746	162.952	138.68	144.026	138.832	222.735	133.247	157.774
81	DG	19:01:00	20:02:00			43.9247	42.6312	43.6264	45.3037	45.7321	48.5255	42.3034	54.8204	53.7511	48.1754	68.7811	41.8436	60.0383	71.8071	71.599	61.5713	69.0278	75.2334	72.7569	78.0497	82.8906	103.889	77.2011	86.9105
82	DG	19:01:00	20:03:00			131.021	124.444	122.378	123.385	124.021	145.243	111.225	141.724	144.311	129.135	149.204	102.99	333.092	327.543	410.776	310.299	436.238	432.008	211.572	220.02	283.686	216.254	251.594	234.794
83	DG	19:01:00	20:04:00			220.494	188.797	189.768	207.9	203.245	245.325	167.4	225.876	223.562	204.47	238.466	172.948	474.5	554.723	654.876	508.615	664.196	651.868	369.254	358.48	406.347	354.32	459.732	408.31
84	DG	19:01:00	20:05:00			622.653	265.304	552.802	238.817	540.037	617.111	583.883	691.925	666.145	258.542	732.137	594.325	820.224	983.114	1048.35	903.524	1114.58	411.93	856.931	369.158	917.59	766.605	911.375	363.807
85	DG	20:00:00	20:04:00			7.24153	7.0333	6.8579	6.2858	7.2138	13.0189	5.01429	5.59468	5.12617	8.53058	12.4558	4.98353	31.0981	33.5251	41.4945	33.7181	40.8509	41.3044	28.66	28.1951	30.7654	56.5299	74.4813	34.3114
86	DG	20:02:00	20:03:00			113.668	136.446	135.042	74.0601	136.065	85.0203	92.7081	100.118	129.38	122.935	144.547	150.792	362.962	414.925	489.516	388.114	407.9	416.323	380.58	427.974	399.658	381.433	205.038	405.013
87	DG	20:02:00	20:04:00			15.9629	16.6018	17.2627	19.9998	20.8321	20.9662	12.9599	13.5694	16.3776	14.7144	15.9066	12.3687	18.8308	19.2016	15.846	15.0243	18.2734	19.0699	22.0141	25.6496	22.7079	24.9599	25.234	28.9554
88	DG	20:02:00	20:05:00			267.606	261.493	250.428	285.227	267.132	267.929	213.497	247.176	253.549	233.727	237.831	182.987	297.344	322.637	362.205	310.272	386.783	316.284	318.88	310.995	346.493	318.509	342.214	340.884
89	DG	20:03:00	20:03:00			73.4361	67.2341	69.7445	74.648	68.1895	79.3908	49.9609	66.6193	66.0013	59.1009	67.5303	52.185	117.345	137.896	164.409	135.639	165.108	135.646	115.582	112.25	127.398	113.001	125.608	126.892
90	DG	20:05:00	18:02:00			526.604	532.948	545.424	526.192	541.052	477.787	571.86	651.7	564.691	654.644	587.328	551.01	364.84	431.529	399.07	382.807	392.395	358.803	587.68	620.581	634.624	607.791	586.923	558.291
91	DG	20:05:00	20:04:00			677.062	629.277	589.999	641.064	637.501	644.263	545.15	603.504	569.904	590.763	557.792	463.635	740.583	857.564	839.261	754.631	909.608	808.867	814.231	462.655	776.174	781.824	864.794	800.517
92	DG	20:05:00	20:05:00			629.894	582.979	552.081	613.796	567.437	581.637	645.665	684.151	560.191	660.14	566.332	530.992	437.347	534.664	467.35	435.562	478.602	413.044	522.116	528.144	515.442	490.787	523.626	509.001
93	DG	20:05:00	21:00:00			10.1061	9.17458	8.88426	9.62969	8.52047	10.6655	8.99903	9.65993	8.83222	8.70329	12.0165	8.51781	59.1222	55.6702	55.5132	46.5121	56.7172	58.7216	45.3048	45.3941	45.8765	42.2235	53.1539	51.1469
94	DG	22:00:00	20:05:00			7.81055	7.29597	6.89394	7.09618	6.93959	7.50808	8.32107	8.94778	7.38442	6.70482	9.57379	7.2156	22.813	27.5275	24.2059	17.0223	26.9818	25.1942	22.1141	20.3524	20.3939	20.672	29.6518	24.8529
95	LPC	16:00:00				0.021817	28.1126	27.6978	33.8651	28.7848	27.9373	13.5605	39.9416	32.5739	34.0672	33.0978	35.0283	12.1243	11.05	24.3598	13.2019	9.455	20.0284	19.5022	17.1075	8.772	19.0868	9.31589	10.5439
96	LPC	16:01:00				18.3587	17.1697	9.7767	17.7403	15.6322	14.5115	15.1664	18.9118	17.9682	36.8932	15.4146	16.1522	7.20477	8.40021	7.81142	9.24062	12.262	8.81826	10.3036	6.83083	5.66065	8.36072	8.90522	7.89017
97	LPC	18:00:00				48.4399	60.1912	60.0939	37.744	49.6394	41.4605	48.1608	64.307	70.3857	54.923	58.2138	43.1531	151.602	243.406	158.102	171.994	196.693	124.196	131.924	167.757	220.722	179.78	227.751	180.651
98	LPC	18:01:00				220.76	220.629	205.164	220.347	234.442	229.041	213.041	372.993	309.856	371.58	254.913	280.648	77.3458	107.966	111.293	109.444	119.837	103.069	112.666	113.692	135.362	117.176	141.311	116.48
99	LPC	18:02:00				128.218	104.327	91.9154	98.5632	119.194	112.598	157.813	316.935	204.261	409.793	191.296	213.73	46.2097	56.1443	57.6517	67.9316	55.5158	44.4734	131.84	123.093	132.896	134.055	126.68	109.198
100	LPC	18:03:00				60.4758	47.0923	45.4512	42.6846	51.3353	49.7117	49.7539	92.0715	60.3392	111.575	75.1508	60.2132	37.9785	47.8068	55.5245	49.8227	50.6405	48.7941	48.0204	43.6524	52.8805	54.075	49.4044	2.59495
101	LPC	19:01:00				67.6891	55.2458	67.0311	59.2977	74.233	82.1993	78.8652	147.286	125.213	118.465	93.2379	97.4852	115.169	114.423	122.113	121.137	133.116	111.205	110.087	98.8264	131.7	133.452	156.665	102.638
102	LPC	20:04:00				112.237	92.8817	86.0976	84.3495	109.504	105.868	101.824	162.775	140.782	199.949	95.7918	82.0645	23.3348	27.1014	29.1407	31.3434	49.2851	30.3482	33.3314	24.8207	33.8691	34.3963	40.7919	46.6809
103	LPC	20:05:00				250.626	113.863	114.467	190.288	205.531	131.7	170.911	450.7	304.386	313.538	179.693	310.971	144.249	149.71	71.3978	70.7364	128.406	67.3917	112.65	107.689	187.232	126.767	212.947	188.166
104	LPE	16:00:00				42.8322	37.5482	36.584	35.8978	36.5962	31.6486	38.5043	47.8083	38.5631	53.3225	40.4418	40.8277	18.6339	22.4871	22.145	20.7935	22.9954	16.0118	17.5497	16.3836	19.1806	18.4675	18.4771	15.8791
105	LPE	17:00:00				103.798	89.3814	90.7977	102.486	105.714	91.0883	98.936	141.616	93.4575	62.7374	101.139	113.732	59.187	204.931	202.49	163.193	218.642	186.711	75.768	74.1658	191.335	209.095	217.187	195.937
106	LPE	17:01:00				139.733	129.102	105.795	97.6081	127.373	113.218	165.568	266.837	166.123	283.756	151.236	160.146	95.7121	98.8016	130.799	106.256	67.235	94.36	97.8387	106.134	81.135	113.904	88.6384	103.025
107	LPE	18:0e				240.064	160.696	171.179	191.746	216.659	174.472	136.398	219.24	258.425	343.298	195.96	168.115	38.6123	33.3385	26.5188	40.587	39.6551	41.9523	41.3313	30.2585	41.7349	37.9572	30.3584	32.7178
108	LPE	18:01:00				290.954	326.104	480.309	391.559	357.095	290.146	415.814	661.356	327.284	755.928	396.464	287.239	248.211	256.52	325.801	64.6422	212.999	208.023	217.12	173.187	253.749	277.274	174.455	211.855
109	LPE	18:02:00				70.7595	61.5564	56.8427	52.0219	70.5326	55.9655	96.3923	142.139	86.4969	159.566	87.3195	95.7862	24.9791	29.5085	31.6279	11.9097	21.0622	23.3967	45.5389	44.849	52.5896	53.8382	40.6637	44.2024
110	LPE	18:03:00				32.7234	25.2499	22.8404	25.6921	28.6885	28.575	44.5917	59.3026	32.1724	69.1572	46.4738	40.6728	15.7957	16.7589	22.7697	18.0309	17.8277	16.5874	18.2663	18.8765	20.2406	19.6243	18.8977	20.1696
111	LPE	19:00:00				8.18553	17.2325	13.2675	13.4091	21.5534	17.8427	15.9416	19.7837	19.5412	22.5416	21.1962	18.4295	88.3306	89.8699	104.118	90.718	109.719	105.927	136.221	135.243	70.9357	140.167	103.125	71.205
112	LPE	20:00:00				86.4229	54.2288	61.5102	60.0045	61.6841	58.7985	52.0326	86.9772	71.1262	81.5955	62.8225	79.7294	183.88	215.688	232.865	196.502	222.574	195.944	239.1	244.735	263.548	286.491	263.069	202.832
113	LPE	20:03:00				57.5431	60.0522	50.234	49.205	61.875	43.457	60.2966	79.2472	68.4278	73.9878	56.6427	65.7992	56.0341	39.843	55.6859	62.4222	56.3011	54.1337	55.6081	57.8306	56.8621	54.5245	46.978	40.1783
114	LPE	20:04:00				104.917	81.2985	71.3956	42.6633	86.1993	84.0041	114.808	147.7	32.8713	163.924	106.847	87.3193	70.8031	46.1457	86.2357	74.1269	45.2949	47.7448	72.5389	67.2417	77.9959	70.4837	64.6713	56.1848
115	LPE	20:05:00				256.868	160.588	147.069	143.833	168.913	185.021	250.488	496.345	228.716	426.273	252.616	229.665	98.9354	108.055	110.117	88.9941	86.8527	91.3997	90.2192	107.915	108.605	90.4671	94.8718	92.1192
116	LPE	21:00:00				7.82238	9.77043	10.212	9.8986	7.71495	10.469	7.43246	14.0698	10.9595	12.5747	13.4806	11.7182	52.9469	65.2788	66.2167	44.3389	64.9771	65.9157	85.3436	64.5271	81.6518	64.2087	62.3593	64.2522
117	LPE	22:00:00				7.66798	8.37748	9.28123	8.5237	9.11915	6.16905	9.95675	10.3503	8.64951	12.6721	9.96945	9.18034	32.3554	40.4418	40.4731	33.4261	36.1233	37.1016	36.4269	34.3475	38.3744	34.2216	40.3843	33.5459
118	LPE	1 day, 3:00:00				1.83805	1.79908	1.92729	0.0358308	2.13845	1.76184	1.71976	1.98149	1.89955	1.90691	1.86927	1.81018	23.9275	27.235	33.0687	26.837	30.8994	31.6628	20.5215	20.5695	21.1997	22.0999	17.4876	19.6313
119	LPI	20:05:00				10.3886	7.30059	6.31712	7.72406	7.8447	9.54904	11.873	16.4168	10.3996	18.1181	11.3822	11.0878	6.97415	6.70742	7.91331	6.9521	8.7401	7.24828	6.18143	6.91764	8.15774	6.26532	7.75308	6.94705
120	LPS	18:00:00				20.432	16.2968	13.5578	15.208	18.5724	18.9471	10.9137	23.1488	17.3687	20.671	15.2842	16.1201	24.0344	44.2122	36.8902	30.3217	25.5197	37.3042	41.3002	31.1395	42.172	38.7314	41.9416	36.49
121	LPS	20:00:00				4.63002	4.15817	3.47431	4.47099	4.81741	4.36579	4.82395	4.73948	5.8164	6.33588	4.31862	4.65599	11.5008	11.776	10.9449	8.37494	12.7566	14.2521	13.1969	0.104223	13.461	14.2707	14.9655	12.7331
122	MG	16:00:00				75.1631	86.8344	108.799	61.0034	97.7318	60.3506	99.5749	73.2766	98.1785	95.9025	77.5617	75.3953	291.768	288.304	340.228	292.995	237.351	214.83	192.345	380.673	288.972	389.525	120.031	238.265
123	MG	18:02:00				71.3958	74.5896	92.9468	60.7109	78.123	52.7152	87.8981	69.7249	85.6418	91.2449	49.4742	82.2958	263.959	179.912	281.065	243.744	197.841	201.786	182.404	277.797	190.993	225.916	86.7224	241.093
124	MG	18:3e				5.29982	4.41186	4.44605	5.45596	4.92933	4.95893	2.88694	4.47009	4.8187	3.62241	3.94068	4.37217	5.3009	6.04411	7.76818	6.18441	5.81737	6.26178	3.83824	5.28744	5.25554	6.44907	5.90277	5.91197
125	MLCL	14:02:00	16:00:00	16:00:00		8.37047	6.63704	6.39203	4.0513	6.74888	6.91914	9.99903	17.7375	14.4285	14.619	14.8771	15.1282	4.7016	10.3401	9.28877	6.71067	5.6046	8.0667	7.92011	6.96314	7.33261	8.05645	3.50901	4.10281
126	MLCL	14:02:00	18:01:00	18:01:00		104.869	104.318	94.3838	97.4224	118.173	105.979	171.914	161.224	273.434	159.33	111.99	240.072	33.3101	84.1591	42.881	46.3283	48.1821	82.7787	90.8293	45.4518	114.352	48.3786	69.8955	49.8958
127	MLCL	18:02:00	20:03:00	20:04:00		5.69489	4.87247	4.32792	4.37915	5.50116	0.159841	11.2563	14.8064	9.6859	20.5049	14.1087	10.4036	6.69678	6.26965	8.46386	7.8156	7.50367	6.30701	6.70036	6.84898	7.26658	3.48819	4.67118	7.50751
128	MLCL	06:00:00	18:00:00	20:04:00		5.51675	4.71493	3.86357	3.84001	5.70119	5.41489	4.93565	11.6864	9.3828	10.2646	8.1039	8.54988	12.1176	20.1965	18.3047	15.7251	12.6038	18.2257	19.5801	15.5855	21.8035	20.2283	11.8166	18.0043
129	PC	14:00:00	20:05:00			80.9957	73.8364	74.5788	92.6495	84.0945	73.0376	72.4786	73.1085	87.1543	79.1907	72.4626	71.5938	21.825	24.8016	24.2036	34.4691	19.9605	20.6864	30.9982	27.4693	27.7849	32.6193	28.4466	24.0323
130	PC	15:00:00	18:01:00			346.634	341.22	362.061	380.101	411.574	350.143	358.222	376.525	395.88	376.055	340.172	374.742	236.339	246.388	293.113	228.105	312.193	273.977	279.461	275.564	322.345	296.542	275.391	259.679
131	PC	15:00:00	18:02:00			273.875	274.374	298.315	302.893	319.915	273.549	357.179	379.662	399.349	511.694	383.951	388.243	161.548	186.969	200.37	196.911	178.396	161.851	392.453	377.953	460.237	423.479	394.712	345.892
132	PC	15:00:00	18:03:00			97.1261	89.1279	94.1609	98.8856	106.787	99.2984	94.3787	106.682	113.604	107.212	109.197	112.914	56.9061	63.1766	84.7143	69.3033	80.309	72.7264	68.5015	69.2778	85.688	78.3584	68.9612	71.0249
133	PC	15:00:00	20:04:00			411.842	400.639	429.141	403.857	444.499	434.943	479.715	492.62	542.004	515.755	538.437	535.93	407.859	473.761	478.599	444.511	541.974	558.68	401.078	389.329	470.982	456.547	425.11	386.402
134	PC	15:00:00	20:05:00			521.645	489.305	545.776	579.041	600.646	547.081	547.468	539.668	611.358	601.01	583.698	556.357	373.881	415.883	422.42	393.755	464.342	421.131	460.535	448.666	488.829	461.807	485.422	446.576
135	PC	16:01:00	18:02:00			199.057	120.585	140.825	136.302	142.382	117.9	120.45	226.228	128.78	228.638	109.7	134.596	49.596	140.227	69.625	130.624	159.975	143.326	145.768	66.2459	96.7035	79.8585	164.69	61.5768
136	PC	17:00:00	17:00:00			87.1733	90.4386	82.495	92.0556	97.8878	85.0738	100.114	89.7383	107.967	96.6533	104.668	91.64	250.3	256.687	273.649	247.601	291.832	272.027	319.137	350.144	344.73	315.743	282.65	335.505
137	PC	17:01:00	15:00:00			239.888	227.669	210.012	233.405	258.494	239.072	222.126	234.429	262.393	231.452	231.024	188.549	198.284	256.762	272.44	239.712	282.972	276.719	240.579	228.874	245.257	253.766	245.443	252.302
138	PC	17:01:00	16:00:00			113.591	91.7397	90.4016	100.363	104.551	102.574	103.752	107.303	106.657	106.795	97.6121	114.948	49.9486	49.3704	50.7556	40.9061	49.6512	60.3055	42.4506	38.9644	43.1812	61.5368	44.743	32.9666
139	PC	17:01:00	17:00:00			538.259	497.978	495.523	537.087	582.071	532.94	551.987	561.715	585.5	583.931	553.43	575.74	855.448	879.186	966.396	833.088	1044.3	1010.63	860.613	877.736	964.903	892.31	847.747	879.289
140	PC	17:01:00	17:01:00			797.231	657.014	693.091	669.069	744.315	739.365	684.678	782.561	777.935	780.796	756.732	831.426	621.271	643.12	692.403	576.58	733.136	790.557	635.321	627.669	678.251	579.664	591.183	614.316
141	PC	17:01:00	18:00:00			213.104	231.093	203.71	207.55	239.793	208.972	218.963	244.408	245.827	222.11	206.285	250.342	451.655	486.387	505.993	453.21	560.318	523.498	484.678	494.163	471.809	470.332	436.42	460.071
142	PC	17:01:00	18:01:00			1619.91	1568.48	1516.57	1618.4	1770.88	1540.08	1741.57	1801.04	1825.47	1774.68	1690.79	1824.62	1116.87	1188.36	1282.37	1111.28	1308.88	1218.76	1587.06	1605.35	1737.08	1610.71	1469.96	1516.52
143	PC	17:01:00	18:02:00			1019.31	1004.87	987.44	997.764	1090.11	960.158	1220.14	1264.49	1300.81	1283.3	1253	1333.69	743.918	887.312	928.573	888.048	964.695	641.556	1190.3	1058.02	1361.01	1301.37	1079.79	1132.2
144	PC	17:01:00	19:01:00			685.26	641.514	628.209	598.962	737.046	658.309	707.56	771.499	814.706	770.032	738.88	808.184	1141.75	1210.76	1323.95	1194.95	1226.71	1193.99	1316.24	1387.75	1518.46	1371.47	1373.28	1356.27
145	PC	17:01:00	20:05:00			1146.24	1044.13	1037.38	1083.84	1094.49	1069.53	1120.99	1069.92	1135.98	1157.34	1117.06	1124.98	737.759	895.125	864.271	769.934	876.299	906.582	820.127	764.574	851.379	795.578	816.576	796.52
146	PC	18:00:00	15:00:00			82.0253	82.5744	81.6617	88.1952	96.5529	82.6119	82.9072	92.876	96.6936	91.78	80.514	89.5945	158.556	166.371	179.761	167.667	185.183	172.577	194.07	204.777	210.42	197.339	183.292	177.62
147	PC	18:00:00	20:03:00			73.7884	85.6327	74.1622	115.812	129.924	128.021	97.5072	96.0138	96.6936	75.9419	63.908	84.2761	414.839	460.293	389.291	351.905	498.345	468.979	290.674	276.828	285.633	285.875	364.768	386.402
148	PC	18:00:00	20:04:00			176.659	169.855	185.722	190.569	217.015	199.072	141.175	151.168	158.605	148.787	156.001	146.344	833.372	906.143	954.6	866.331	1013.86	953.264	714.803	667.12	713.387	682.388	719.439	707.074
149	PC	18:00:00	20:05:00			609.894	591.599	591.6	637.791	703.641	604.304	579.251	600.498	581.051	556.804	556.936	595.121	1601.48	1838.39	1682.97	1532.55	1825.56	1738.25	1603.14	1542.61	1589.89	1454.48	1589.67	1518.65
150	PC	18:01:00	18:01:00			809.918	869.391	837.406	896.768	1009.97	787.791	844.658	831.462	845.486	775.616	729.609	818.165	154.441	182.93	212.834	172.425	240.327	185.126	186.206	155.35	218.372	181.211	195.945	181.651
151	PC	18:01:00	20:02:00			182.927	197.916	200.404	207.868	236.265	180.542	200.229	213.05	226.341	198.992	188.705	193.917	94.7101	106.161	107.598	99.4302	115.376	108.226	110.404	104.159	117.298	100.476	102.988	101.078
152	PC	18:03:00	20:05:00			401.546	363.065	370.394	409.796	413.353	415.795	395.243	376.525	398.482	396.766	384.454	390.288	288.193	350.964	388.146	333.384	375.213	361.728	330.35	291.997	359.057	316.809	368.398	307.46
153	PC	18:04:00	18:03:00			25.8859	20.3185	14.7532	23.7736	23.6829	28.1756	17.4571	21.2865	25.3467	23.5513	23.6367	22.1966	20.0476	21.3371	29.2375	22.8918	31.0646	19.4496	16.095	15.6567	26.3085	14.6654	26.4318	17.5216
154	PC	18:04:00	20:05:00			56.2851	49.8068	52.4968	57.312	55.1731	59.9073	70.9144	66.8331	62.4389	69.0381	70.4497	73.2302	29.8741	37.2365	42.0147	31.9948	39.9998	38.1113	36.3166	32.1873	39.9927	35.644	41.2212	33.4715
155	PC	19:01:00	18:00:00			110.168	73.8364	100.411	103.34	113.016	106.684	107.414	90.6797	129.214	124.269	119.261	130.914	402.873	412.759	479.744	433.789	530.34	439.729	446.792	407.026	495.158	409.612	428.739	451.841
156	PC	19:01:00	18:01:00			597.006	655.168	733.105	602.677	671.649	631.766	797.541	787.437	893.049	824.192	820.024	764.816	16.6812	758.633	942.892	709.16	871.102	853.565	857.784	861.531	966.577	866.675	689.397	866.791
157	PC	19:01:00	18:02:00			672.607	685.858	699.881	691.844	769.663	689.288	860.255	919.294	1014.56	917.715	986.207	953.13	996.983	1148.61	1259.23	1150.06	1143.84	1150.28	1371.25	1478.71	1530.95	1461.15	1288.4	1422.82
158	PC	19:01:00	19:01:00			159.904	149.389	140.794	156.768	166.373	174.502	121.452	160.629	167.775	223.324	196.217	191.017	426.715	462.613	636.51	525.337	506.015	515.688	429.468	458.759	564.922	460.721	411.463	449.674
159	PC	19:01:00	20:00:00			15.8118	12.184	13.9187	17.6691	12.446	16.2091	14.0821	20.3396	15.8067	16.4581	16.3287	14.5392	71.3558	76.28	76.3804	82.1758	85.7077	80.9352	67.3406	64.2973	74.8575	58.9616	76.674	79.2973
160	PC	19:01:00	20:03:00			146.173	141.958	186.204	175.473	162.809	126.081	205.918	181.963	226.742	248.499	225.399	208.195	469.583	487.166	611.309	506.805	610.715	578.078	402.721	398.073	436.87	411.642	358.83	438.237
161	PC	19:01:00	20:04:00			161.893	158.54	169.499	168.001	183.627	188.941	166.723	284.251	215.471	271.142	312.935	168.388	549.012	576.649	661.428	563.081	675.361	684.957	425.79	404.281	464.386	424.143	402.306	430.675
162	PC	19:01:00	20:05:00			981.557	969.922	1037.44	953.221	1081.21	1025.81	1214.93	1258.22	1504.6	1449.8	1449.25	1313.23	1715.2	1909.31	2095.3	1822.89	2006.95	2067.02	1725.07	1731.76	1826.62	1706.72	1665.05	1817.75
163	PC	20:00:00	20:05:00			29.8781	29.2856	30.0715	31.4771	31.8439	29.8169	28.0778	35.4561	33.8025	30.1859	30.5928	29.6946	220.383	128.343	116.787	108.203	115.376	131.626	121.617	112.382	116.402	118.404	130.663	124.646
164	PC	20:02:00	20:03:00			43.9298	41.0325	68.7458	51.9669	50.2787	40.7588	34.4329	48.6344	43.7939	35.6671	46.0488	33.6045	41.681	46.3631	56.8798	49.9444	50.0369	45.1529	60.3677	62.1813	65.0807	53.9853	58.0726	55.5152
165	PC	20:02:00	20:05:00			401.546	422.047	437.473	448.4	489.439	443.15	426.008	420.452	459.62	418.29	428.737	390.288	607.3	591.805	760.262	640.447	753.335	683.481	658.113	643.405	735.126	651.753	689.612	659.584
166	PC	20:03:00	20:03:00			79.6228	81.2637	84.9948	83.7409	90.7687	85.8944	76.6501	80.3252	89.3223	78.3785	91.5846	75.6848	202.433	209.152	271.359	225.18	246.264	217.427	211.321	197.193	221.164	204.806	183.292	215.014
167	PC	20:03:00	20:04:00			60.4035	61.6031	62.0796	63.2511	63.6271	66.746	64.6572	57.7338	70.2438	56.8549	75.4818	58.0932	134.623	142.604	170.601	144.271	168.7	136.501	143.18	135.254	162.963	149.338	138.376	145.42
168	PC	20:03:00	20:05:00			600.603	572.341	608.296	641.42	622.922	631.899	594.429	561.649	628.725	580.732	634.048	535.93	836.659	919.002	1057.96	936.788	1047.11	920.408	991.913	887.367	1038.67	910.961	1029.88	953.541
169	PC	20:05:00	18:02:00			1030.11	974.894	1083.29	1104.94	1112.5	1184.56	1491.45	1366.8	1240.39	1247.04	1444.7	1252.17	891.811	1053.95	1108.57	1013.9	989.051	934.057	1518.07	1479.08	1406.02	1514.94	1521.77	1382.41
170	PC	20:05:00	20:04:00			930.42	950.261	973.274	1018.55	1050.51	350.278	874.958	902.09	1020.27	886.53	899.24	895.536	1167.73	1332.55	1390	1216.56	1423.29	1250.94	1377.47	997.34	1396.83	831.438	1353.36	1259.96
171	PC	20:05:00	20:05:00			950.669	878.172	1020.77	1158.12	1005.57	932.803	1115.86	1069.96	239.349	1027.45	1122.16	928.673	829.678	966.536	898.804	808.114	921.066	875.558	1026.41	922.761	1029.71	899.227	1143.3	958.734
172	PC	20:05:00	21:00:00			12.6553	8.70614	8.20331	15.4542	17.4433	14.484	15.2518	10.7347	8.94364	7.69375	8.19659	7.72667	53.9918	67.5826	53.5019	48.7496	104.711	67.536	54.5	49.8236	62.9936	63.2084	37.1459	48.3329
173	PC	20:05:00	21:01:00			10.2424	9.9312	11.0894	9.92335	12.7363	11.7564	15.2546	16.4629	16.3385	18.6588	18.3533	15.4677	34.1006	35.4023	41.6295	40.904	40.685	45.6774	41.5102	40.2902	42.7753	38.9856	37.5794	53.1819
174	PC	22:00:00	18:02:00			9.70305	9.1629	8.50795	5.76244	8.89405	9.79384	5.08162	7.80688	13.0781	11.2333	12.6923	11.2948	20.8508	28.049	35.3873	20.0474	25.3782	21.011	23.4818	31.8309	43.2666	20.6401	40.8712	28.5305
175	PE	14:00:00	20:05:00			13.7684	11.8689	12.3672	13.4474	11.8687	10.951	14.4695	13.1785	12.4017	14.2917	10.7293	14.8362	1.63106	2.17034	2.59389	2.19035	2.58578	2.03567	2.03086	2.02994	2.90423	2.60274	2.51933	1.86875
176	PE	15:00:00	15:00:00			16.8966	15.3393	17.846	15.6795	18.9811	16.0036	18.7004	22.6564	23.8052	23.6019	21.1918	24.0783	29.3826	31.6808	43.1417	27.1276	39.5682	38.4534	34.9653	38.3463	48.7801	44.1077	36.7758	42.1593
177	PE	15:00:00	16:00:00			81.4372	71.835	80.6849	75.8333	79.17	69.326	88.954	102.078	94.9839	105.552	88.5385	106.239	49.3414	51.2193	62.3883	50.7156	63.2947	87.5186	62.0414	72.4689	81.9875	71.4058	68.3474	53.9946
178	PE	15:00:00	17:00:00			72.3167	144.987	119.252	133.737	150.791	139.71	165.719	152.626	56.2228	92.4697	174.798	120.775	356.265	186.148	352.453	175.461	406.498	186.64	347.817	350.542	207.939	342.709	304.794	40.7054
179	PE	15:00:00	18:02:00			71.1588	70.5109	70.3983	68.9394	69.9164	64.4349	94.5891	96.2452	86.7101	98.5367	94.9708	115.408	34.9259	43.3599	46.4951	43.0679	44.0673	42.0989	79.0126	84.4207	90.3252	88.4468	78.0617	86.8149
180	PE	15:00:00	20:05:00			41.1139	36.7451	38.5744	42.053	40.0991	38.7035	49.5083	47.6365	49.3122	52.6167	48.8097	52.1709	27.7645	30.8291	34.2289	30.7657	37.6664	36.3779	28.0549	28.9014	35.1416	31.0873	35.7349	32.9536
181	PE	16:00:00	14:00:00			52.7102	73.8212	90.9714	28.7248	62.0337	30.4099	22.3012	36.6996	33.0954	34.7589	29.1531	36.9939	72.0591	61.647	64.396	62.4475	71.8928	61.54	23.6646	25.8537	26.1764	23.0034	23.4952	26.8534
182	PE	16:00:00	18:03:00			70.4473	65.4368	96.6236	59.6151	90.5429	56.5469	75.483	39.4517	61.466	91.2709	110.096	65.5476	26.7081	42.662	49.6924	38.5794	49.5314	26.3127	18.3206	35.6155	45.5013	21.4188	44.4877	39.222
183	PE	16:00:00	20:03:00			25.235	22.8721	13.8466	21.7157	20.5408	21.1113	14.9271	15.8317	12.5568	12.945	14.3588	14.3079	11.4069	9.13714	13.3788	8.39714	13.0504	9.67426	10.1702	14.6452	15.1572	11.0352	7.65696	12.0668
184	PE	16:00:00	20:05:00			413.775	370.761	356.814	415.934	305.37	346.63	458.858	357.274	319.04	398.611	393.504	404.719	98.4174	122.684	125.61	109.769	121.075	117.697	93.0741	91.7849	102.137	93.4064	99.2251	92.715
185	PE	16:01:00	14:00:00			17.5308	29.2469	26.5089	12.9573	25.8889	11.921	11.77	14.699	12.3245	12.6339	12.7537	14.395	10.2068	5.76174	7.78547	11.0008	10.5294	5.81637	5.05301	3.75717	7.24549	3.6084	4.44718	3.48193
186	PE	16:01:00	17:00:00			742.95	694.847	1001.33	375.125	804.039	576.086	586.452	679.793	676.471	695.816	641.336	758.216	549.306	536.512	638.665	402.253	655.272	582.452	372.296	356.066	453.016	430.662	382.329	385.189
187	PE	17:00:00	17:00:00			103.312	104.939	104.151	113.061	118.241	111.857	163.418	163.811	162.83	164.228	155.51	160.623	396.721	405.283	549.323	406.219	523.924	459.473	443.274	449.161	488.451	476.125	447.554	63.1048
188	PE	17:00:00	18:02:00			1209.7	1165.25	1150.8	1208.74	1261.24	1154.72	1376.57	1327.02	1280.79	1355.28	1399.97	1482.92	1274.09	1367.22	1441.86	1269.43	1467.58	1410.86	2136.02	2188.22	2424.88	2223.57	1554.3	1609.87
189	PE	17:00:00	20:01:00			38.4753	41.0451	37.2852	40.4418	43.5223	1.2901	58.3589	53.9533	50.9637	55.8017	2.40507	56.5934	140.368	136.716	190.174	144.856	196.645	184.081	164.713	164.106	199.402	179.363	158.548	183.734
190	PE	17:00:00	20:04:00			298.166	281.85	268.542	285.493	302.057	307.999	299.207	272.075	300.986	293.483	336.526	298.255	712.002	693.023	863.638	690.198	921.094	931.956	651.73	649.165	731.847	694.597	602.758	725.985
191	PE	17:00:00	20:05:00			1339.01	1308.35	1366.23	1418.2	1305.86	1397.23	1395.08	1082.13	1416.55	1351.54	1431.47	1169.3	1163.19	1681.85	1907.18	1120.62	1562.94	1435.46	1376.94	1609.89	1823.5	1555.01	1656.49	1514.03
192	PE	17:00:00	21:00:00			7.68896	6.98961	5.84144	7.03393	6.09113	7.83801	6.79595	8.00668	6.502	6.91731	8.87431	8.23415	63.6313	75.075	75.4246	65.5775	85.1194	82.2373	75.6646	67.7113	81.2927	68.1215	84.3067	87.6578
193	PE	17:00:00	23:00:00			1.10684	0.998945	0.858189	0.953078	0.603344	1.10368	0.886701	1.10941	0.789213	0.901473	1.31685	1.00924	10.8715	12.4527	10.2041	9.97395	11.6791	13.2907	9.56292	10.2573	12.3591	9.66579	13.4911	13.5531
194	PE	17:01:00	15:00:00			313.626	344.278	421.104	248.182	338.615	246.681	292.22	320.817	310.104	322.078	313.29	357.291	218.96	230.718	295.449	236.712	301.587	255.766	196.192	185.231	228.592	226.49	203.654	219.987
195	PE	17:01:00	17:00:00			874.944	801.059	948.238	919.154	1024.7	944.158	905.572	901.656	873.672	899.211	1108.56	1210.94	1571.48	1904.25	1972.45	1590.39	2414.02	2331.17	1908.23	1967.33	1785.53	2082.89	1751.99	1710.86
196	PE	17:01:00	18:00:00			669.288	744.686	629.903	624.94	654.436	597.459	567.339	670.699	628.675	634.427	635.492	0.591767	2364.64	2532.75	34.7165	2194.98	2105.56	2504.41	2443.69	2312.55	2278.61	2611.64	2220.25	2292.16
197	PE	17:01:00	18:03:00			37.1607	33.1037	73.2914	33.0909	36.3291	75.0677	82.1114	44.72	86.3791	87.6945	93.8357	99.2827	36.0611	40.1887	60.9989	43.755	57.4926	62.8724	44.5647	73.3365	47.1007	46.859	44.0615	46.5597
198	PE	17:01:00	20:05:00			108.319	90.0421	109.294	102.26	103.846	89.741	114.312	118.119	120.136	127.237	110.484	126.475	42.6793	62.2573	59.705	54.2538	65.4935	65.66	47.1448	42.1072	53.5051	52.0816	53.7759	50.0272
199	PE	18:00:00	15:00:00			180.796	171.808	159.441	175.106	180.96	165.234	191.191	181.797	186.327	193.247	194.86	207.102	424.949	441.905	496.248	436.088	531.996	502.478	470.058	471.235	497.483	500.096	447.554	483.804
200	PE	18:00:00	17:00:00			104.366	106.263	96.7575	103.179	112.072	106.541	111.897	111.557	107.229	108.741	121.078	119.519	578.297	628.677	659.011	590.661	725.716	646.582	661.563	665.104	638.53	628.22	624.494	742.563
201	PE	18:00:00	18:02:00			1151.23	1151.46	1050.61	1125.6	1312	1079.9	1299.37	1309.63	1230.64	1332.35	1353.94	1475.96	1264.85	2709.03	2713.98	2574.73	2845.57	2774.85	3976.13	4230.84	4167.5	4081.81	3468.78	3707.02
202	PE	18:00:00	18:03:00			189.493	178.098	154.941	171.2	181.303	183.735	161.808	145.583	145.62	156.893	169.888	171.69	408.165	536.512	540.477	448.036	661.143	597.541	464.701	429.007	494.009	456.286	527.35	459.36
203	PE	18:00:00	20:02:00			101.467	102.621	86.1496	100.652	93.5646	95.908	90.564	91.1413	88.3648	82.5922	96.8626	87.2676	270.076	281.989	244.144	236.712	260.495	266.328	348.191	361.824	354.353	351.307	310.165	343.888
204	PE	18:00:00	20:03:00			297.813	298.926	264.878	284.95	294.403	297.719	249.554	240.127	247.885	230.557	275.831	244.729	1174.9	1245.15	1353.4	1217.16	1482.25	1312.78	964.221	953.028	1021.37	967.129	915.924	935.578
205	PE	18:00:00	20:04:00			526.565	522.697	487.313	515.429	549.38	551.836	467.296	403.931	420.964	403.702	493.382	429.053	1518.95	1616.23	1793.89	1545.69	2045.04	1785.8	1416.84	1349.37	1516.05	1431.65	1370.4	1399.12
206	PE	18:00:00	20:05:00			1681.46	1655.18	1626.56	1721.19	1751.34	1628.95	1839.46	1628.39	1638.22	1706.06	1789.69	1729.54	2639.72	3021.31	3149.1	2673.28	3280.03	3032.97	2731.96	2725.68	2862.61	2463.28	2629.81	2587.59
207	PE	18:00:00	21:00:00			4.40441	3.97556	3.43881	3.99908	3.44844	4.37312	4.4843	5.14289	4.14155	4.36531	5.64174	5.42113	32.6709	38.6229	37.1293	30.4624	41.352	39.7501	36.8762	30.1383	37.7435	29.9669	42.4416	42.1176
208	PE	18:0e	13:00:00			15.2427	13.8867	14.2719	13.6201	17.1108	14.9669	13.0011	14.9954	16.1951	15.4412	14.8806	14.0116	3.74083	0.166136	4.79068	4.44411	4.69646	3.87411	4.92473	4.88269	5.49128	5.74679	4.48188	4.3255
209	PE	18:0e	15:00:00			114.908	120.166	116.366	124.321	136.748	123.341	127.192	118.362	129.072	129.469	137.348	123.945	40.4418	43.704	48.785	43.7698	43.221	39.5791	36.5756	42.8225	47.5313	42.7544	33.267	37.8157
210	PE	18:0e	16:01:00			361.065	374.072	376.101	388.359	438.691	363.642	336.093	340.261	387.217	360.344	318.966	319.349	55.3592	54.759	63.0038	62.1769	63.4988	60.6325	47.0222	56.7364	62.6237	56.6857	47.5309	65.5018
211	PE	18:0e	17:01:00			938.121	999.598	877.435	900.707	1045.16	907.946	933.637	894.308	1144.98	927.819	1017.66	954.729	249.845	270.148	287.076	273.686	268.19	285.55	211.945	236.654	240.071	231.876	196.906	179.983
212	PE	18:0e	18:00:00			27.9364	26.9999	17.2878	23.2096	30.1108	21.4783	16.0194	16.2782	27.0925	27.4731	19.1666	23.0522	20.4498	17.438	16.5663	19.3001	16.252	13.5522	14.0148	14.3887	27.2242	13.9888	15.5216	14.0268
213	PE	18:0e	18:01:00			3187.31	3374.72	3274.58	3240.76	3770.59	3209.75	3877.96	3304.01	3870.81	3792.89	3479.19	3749.97	714.99	869.784	795.653	884.236	806.29	871.749	729.001	672.478	779.825	682.803	634.189	604.577
214	PE	18:0e	18:02:00			2793.95	2635.13	1093.4	2919.08	3167.05	2680	3248.88	3671.77	3409.5	3285.91	3565.93	3163.84	373.584	399.197	360.045	447.741	332.178	397.282	196.093	201.649	568.803	205.505	440.894	508.965
215	PE	18:0e	20:05:00			207.151	204.581	189.015	223.134	236.825	210.742	262.032	239.884	259.468	263.721	256.913	242.832	40.5316	41.7918	36.1828	37.0491	37.3271	40.313	33.8333	40.2973	37.912	32.9753	31.0719	31.365
216	PE	18:01:00	18:01:00			703.621	738.145	703.916	744.495	829.321	648.553	631.846	575.967	572.488	564.359	540.991	616.486	253.856	285.529	189.977	306.722	407.797	117.499	296.473	268.526	486.894	287.458	306.964	288.906
217	PE	18:01:00	18:02:00			500.747	516.418	511.111	530.833	565.5	465.717	551.434	505.53	493.122	497.467	491.88	565.975	192.257	217.901	230.875	195.642	234.078	207.48	370.288	367.583	423.139	365.36	357.349	355.688
218	PE	18:01:00	20:05:00			537.644	516.418	520.755	558.409	544.937	512.502	579.61	503.1	522.908	522.978	541.068	543.842	149.533	183.72	192.838	156.066	202.525	181.073	187.487	147.801	242.488	196.732	221.695	184.587
219	PE	18:1e	15:00:00			124.396	122.815	113.795	123.631	139.147	119.726	129.607	125.167	133.044	130.744	142.645	125.526	81.633	91.5549	91.1115	85.8735	93.191	92.7999	79.0126	80.6838	91.02	85.1404	81.1842	81.9563
220	PE	18:1e	16:01:00			165.246	166.843	159.762	174.187	185.073	167.361	137.255	145.097	160.844	150.516	149.456	139.122	52.3211	60.5128	63.5583	57.9888	66.7944	60.9896	55.6796	56.2677	56.8707	60.1825	57.2453	54.061
221	PE	18:1e	17:00:00			144.953	142.677	118.938	142.705	157.997	132.272	149.732	160.409	161.175	154.342	176.32	153.351	115.202	134.281	123.841	105.288	133.549	133.541	111.153	111.331	131.319	118.205	125.246	123.058
222	PE	18:1e	17:01:00			695.754	724.948	630.027	668.695	736.838	684.737	756.682	750.989	814.127	794.009	832.387	749.337	383.685	167.81	441.335	421.093	462.223	491.849	365.547	425.1	417.524	444.647	378.14	401.137
223	PE	18:1e	18:01:00			4500.99	4628.01	4300.93	4545.02	4756.4	4355.01	4459.19	4322	4792.72	4553.07	4722.4	4292.47	1651.35	1910.65	1908.13	1647.34	1882.07	1700.72	504.099	1621.45	1894.54	1600.57	1633.35	1573.81
224	PE	18:1e	18:02:00			1828.73	1904.4	1777.05	1949.11	1982.08	1773.77	2206.42	2131.45	2270.06	2283.65	2468.8	2189.1	676.602	782.897	710.284	699.824	689.258	709.238	951.004	988.646	1063.35	1009.93	961.416	919.035
225	PE	18:1e	19:01:00			872.334	867.295	806.827	854.832	887.638	897.394	829.135	904.107	367.339	911.998	446.451	878.974	109.797	125.085	118.467	116.43	130.553	124.424	153.286	142.937	175.038	156.99	162.69	143.223
226	PE	18:1e	20:02:00			384.784	407.175	379.315	381.465	411.273	395.541	470.933	478.796	486.503	475.144	518.366	455.309	159.451	183.72	165.416	155.319	158.498	172.019	222.307	219.782	239.709	223.184	210.246	211.559
227	PE	18:1e	20:03:00			458.579	450.21	427.533	422.828	455.828	455.085	458.858	449.63	489.813	471.956	544.852	452.147	366.204	400.4	427.251	388.298	417.525	409.678	317.389	309.998	358.522	330.642	309.818	312.702
228	PE	18:1e	20:04:00			540.777	526.978	441.001	537.473	491.432	476.752	501.882	445.233	483.493	518.796	592.867	496.375	318.413	447.338	383.09	389.813	482.74	403.189	327.288	302.223	376.035	341.13	403.454	364.577
229	PE	18:1e	20:05:00			922.412	857.368	900.052	942.158	925.343	922.916	1074.67	986.744	1025.94	1093.77	1138.87	1011.78	521.788	610.333	571.382	512.952	575.973	565.8	536.306	521.088	561.361	509.962	555.085	509.037
230	PE	18:02:00	21:00:00			60.8803	59.9177	56.5758	55.6111	72.6582	58.9058	72.4512	69.5104	60.5647	67.2856	86.6466	76.2011	189.205	219.121	204.338	197.882	215	212.006	393.724	348.388	430.782	388.505	364.288	391.089
231	PE	18:02:00	23:00:00			15.7141	8.67992	7.50453	8.36574	7.55048	16.577	8.50728	9.53212	7.99279	7.84722	19.2392	9.25718	27.9047	55.3536	44.5906	44.9036	51.1677	54.9788	83.0302	54.571	88.9356	71.7541	88.123	56.1177
232	PE	18:04:00	18:00:00			103.312	97.3249	91.9357	100.652	92.5364	100.161	92.174	75.5865	75.1267	80.0411	90.4303	89.1647	93.0769	220.953	120.303	91.1006	215	203.707	91.0653	61.7404	164.67	160.362	85.3475	85.9721
233	PE	19:00:00	20:03:00			50.8653	52.6349	49.1824	46.649	53.1228	54.0147	70.0362	67.323	72.479	68.2422	76.0523	66.3993	178.524	175.785	218.491	181.454	209.863	213.515	203.558	212.104	233.456	218.224	194.287	228.416
234	PE	19:00:00	20:04:00			48.7952	45.8988	42.1244	48.1604	50.4016	53.5838	41.742	39.1914	40.4649	37.4724	47.3118	40.56	231.143	231.315	291.002	235.944	312.572	308.556	281.213	278.303	307.086	280.196	265.054	288.237
235	PE	19:00:00	20:05:00			216.36	206.625	209.95	217.162	215.549	230.296	246.736	211.518	224.811	232.441	270.974	232.01	570.416	615.369	699.614	571.851	765.848	730.812	715.041	700.716	760.704	680.972	686.933	718.048
236	PE	19:01:00	17:00:00			1072.6	1085.74	1012.52	949.019	1127.5	1029.21	1014.23	1028.03	959.709	978.92	1059.36	1116.07	3371.95	3381.32	4051.18	3360.1	3984.29	3945.7	3635.77	3618.06	4029.74	3719.54	3365.26	3792.7
237	PE	19:01:00	19:00:00			153.123	159.56	144.011	152.356	175.134	158.004	162.21	179.852	148.929	162.633	178.969	179.91	953.657	1013.21	1194.18	978.211	1203.41	1192.06	1151.71	1151.7	1278.45	1157.25	1096.33	1171.58
238	PE	19:01:00	20:03:00			44.8037	63.5591	45.325	39.2955	47.6391	48.4857	48.7033	47.1504	57.5861	50.7033	62.8093	53.4356	267.024	282.6	351.178	200.869	345.614	346.302	150.66	160.278	171.618	164.495	138.083	171.101
239	PE	19:01:00	20:05:00			116.059	111.057	112.273	107.677	116.96	121.769	140.122	135.986	144.499	149.818	167.863	152.806	217.038	243.672	271.295	220.853	277.156	289.196	218.27	199.792	226.335	203.909	218.207	229.97
240	PE	19:01:00	21:00:00			49.8111	46.3452	39.5388	45.5	40.4418	50.3996	48.7033	57.6013	44.6788	49.7467	57.5122	58.4946	176.236	194.707	208.76	171	220.87	223.323	194.183	174.674	218.865	171.934	208.165	192.173
241	PE	20:00:00	17:00:00			15.9983	16.0235	13.4394	14.5399	15.3536	15.8642	16.7771	17.582	15.2147	16.8006	20.2035	19.1586	83.9218	115.97	117.649	106.035	132.816	119.961	127.224	88.9854	101.442	88.4468	125.593	108.729
242	PE	20:00:00	18:02:00			196.082	195.974	184.836	183.609	207.693	203.937	242.712	236.238	247.223	263.083	279.615	286.782	569.905	671.403	788.159	628.744	692.696	777.105	930.741	893.524	1007.47	1016.72	850.006	859.721
243	PE	20:00:00	18:03:00			24.4076	21.7971	22.5848	20.9599	20.8021	24.0302	19.6004	20.6429	17.2973	21.7531	22.383	21.3506	64.5263	64.0884	84.967	72.1539	88.0545	75.4471	79.0126	74.6789	79.2083	82.5558	66.2657	72.6309
244	PE	20:00:00	20:03:00			31.8897	33.7658	29.9663	28.9546	32.4158	35.0883	35.4364	30.3804	31.2807	29.3542	39.3504	32.8834	147.245	155.033	183.992	153.079	190.785	181.828	151.329	152.6	162.585	148.789	139.47	155.087
245	PE	20:00:00	20:04:00			29.5177	30.3012	28.3626	29.6439	30.1713	32.9617	28.8445	24.1498	24.0296	23.1884	32.3463	25.8433	121.305	128.787	149.494	131.424	172.44	162.211	115.84	128.606	138.962	133.084	123.511	133.172
246	PE	20:00:00	20:05:00			110.164	113.877	102.544	119.035	112.415	116.536	145.305	118.848	121.129	125.961	147.942	129.32	226.589	250.25	271.565	226.258	285.443	261.801	253.778	260.091	268.196	252.115	248.41	254.545
247	PE	20:01:00	21:00:00			16.0324	14.8166	12.4913	14.298	11.7834	15.9851	16.7364	19.1229	14.5864	17.0476	21.1342	19.8196	64.0543	70.8025	78.6415	63.3252	79.9829	83.7463	68.9686	63.9693	75.7342	62.1257	75.2862	73.3426
248	PE	20:02:00	18:02:00			276.729	283.037	302.166	280.354	286.52	278.58	270.484	260.057	277.671	254.473	278.858	265.281	299.067	361.337	420.175	339.014	381.57	359.883	335.469	329.193	366.859	324.029	320.574	335.46
249	PE	20:03:00	21:00:00			21.1606	22.9769	20.1431	21.1762	22.0167	23.1795	21.0278	19.4569	19.335	19.4687	25.2865	19.4966	141.904	139.163	160.109	134.411	180.512	157.684	122.536	118.049	134.098	114.072	128.715	130.644
250	PE	20:04:00	21:00:00			11.1306	11.7655	10.6623	9.98835	10.2824	12.0956	9.88859	8.46284	8.75411	8.02108	9.26647	8.80904	119.779	115.359	150.378	122.463	155.563	156.93	107.805	100.773	116.728	105.806	100.96	112.944
251	PE	20:05:00	18:02:00			92.7699	82.7592	97.7219	100.881	93.5646	92.7182	121.96	105.481	109.215	110.973	113.889	117.622	40.7374	49.6951	56.1849	51.2806	53.2896	52.7146	79.6822	77.3358	95.1889	78.1099	94.368	87.6578
252	PE	20:05:00	20:04:00			15.4654	15.7596	15.9583	17.8705	16.0193	17.9818	13.9764	12.387	11.8867	13.9617	14.7918	13.1201	22.3584	27.4492	28.6847	24.9295	29.5992	29.3993	26.6685	24.4707	29.5626	23.6622	31.3416	28.1334
253	PE	20:05:00	20:05:00			30.0448	25.5134	27.8491	32.1717	25.5033	30.4099	33.8704	29.8943	28.459	33.4833	30.4964	29.9296	17.0765	22.1855	20.9641	17.5329	21.0115	21.0182	22.4815	20.0637	23.6916	18.3441	30.039	23.3224
254	PE	22:00:00	18:02:00			59.0279	57.5921	51.4243	57.2134	52.7702	55.2846	88.5403	78.4973	63.8663	73.973	88.1505	85.6769	174.685	194.692	178.659	166.497	190.761	190.102	238.357	277.342	260.533	224.812	244.237	273.063
255	PE	22:00:00	20:04:00			12.4297	12.4758	11.7872	12.4086	11.7119	12.7162	11.8396	10.1033	9.48183	9.98994	13.9478	10.5212	72.052	75.6854	88.4578	74.6726	91.7235	85.2552	57.9539	56.7174	68.1371	58.6454	60.3677	62.3351
256	PE	1 day, 0:00:00	18:02:00			5.90255	5.80088	5.04642	5.84406	4.73027	6.37658	6.36753	11.3023	6.09287	5.87298	12.1249	10.9325	19.1179	24.8823	20.6455	19.4949	22.9518	2.44982	32.955	28.4451	35.3003	27.5914	43.8524	34.486
257	PE	1 day, 2:00:00	18:02:00			4.73229	4.85702	4.61214	5.85171	3.72488	6.08455	7.27207	6.48533	5.42665	6.21224	7.97143	7.88948	8.68471	12.2716	11.569	9.71865	14.1837	11.947	14.4132	13.3448	15.9906	11.4879	17.5582	12.9903
258	PE	1 day, 2:00:00	20:03:00			1.40668	1.66046	0.978305	1.60643	0.94545	1.93657	1.74867	1.21023	0.818933	1.23647	1.25702	1.86254	4.45073	6.97771	7.9722	7.14105	8.97582	5.44903	3.58394	4.06125	5.11718	3.18243	3.60415	3.2849
259	PE	1 day, 2:00:00	20:05:00			4.34078	4.0957	3.26465	4.79783	2.65579	4.37639	7.74243	4.55231	3.20927	4.66761	6.14201	5.53962	8.19773	10.1891	11.2002	8.60259	11.6716	10.2157	7.10815	5.9781	7.42842	5.50103	8.74074	6.67487
260	PE	1 day, 3:00:00	17:01:00			5.88771	5.63298	4.71876	5.73126	5.03588	5.91576	6.07057	6.85269	5.32278	5.96985	6.60927	6.87665	27.8957	30.1111	34.2085	27.921	37.7645	38.2545	23.8516	17.5039	25.7778	22.1705	25.551	25.1979
261	PE	1 day, 3:00:00	18:01:00			4.17131	3.63594	2.91885	3.4802	2.74138	4.87058	3.4245	3.40856	3.37418	2.97699	3.13325	3.38825	13.0574	14.448	16.625	12.5913	18.8663	17.8256	14.0075	0.183764	15.1411	12.1637	14.1533	15.1092
262	PE	1 day, 3:00:00	18:02:00			4.59138	4.59118	4.14696	5.41442	4.63865	5.56263	4.71349	6.03464	5.57902	5.72398	6.16743	5.57282	15.1725	16.3372	15.7698	14.9296	18.7734	16.8477	28.3841	26.8202	30.2644	28.395	31.877	29.392
263	PE	1 day, 3:00:00	20:05:00			3.37369	2.6801	3.25721	4.52056	3.3093	3.42621	4.14341	2.56658	3.33386	3.60808	3.0969	3.32669	18.26	21.6845	20.8175	17.0703	25.6963	25.8858	17.977	15.4444	17.4156	16.1432	22.2085	18.506
264	PG	18:00:00	18:01:00			129.601	121.848	109.186	111.63	120.049	108.334	263.875	233.946	204.884	245.101	222.363	251.182	123.886	139.906	153.275	130.517	145.662	142.296	131.114	133.565	150.291	138.219	75.9987	127.062
265	PG	20:04:00	20:04:00			2.0899	2.22448	1.50206	1.10561	1.5061	1.31212	5.87049	4.64245	4.78256	5.02991	2.82658	4.29934	2.54322	2.81675	1.76823	2.88854	3.13485	2.01842	2.17001	2.46828	1.86534	2.56779	1.7103	1.63759
266	PI	16:00:00	18:01:00			78.1979	53.8092	58.8632	62.4991	55.7969	51.6821	41.3671	43.5658	47.4912	54.0705	52.6339	48.9864	103.346	81.3121	100.637	79.1375	133.222	111.867	79.2669	89.944	76.9036	73.3856	67.9016	76.6429
267	PI	16:00:00	18:02:00			19.1672	14.818	20.2053	26.0813	28.7662	20.1121	26.8313	20.102	14.3333	32.1737	19.3688	32.2963	11.8981	14.3208	15.0038	12.9491	17.5106	12.3248	15.0787	14.1465	17.4141	15.1052	18.0656	13.7649
268	PI	16:00:00	20:05:00			158.815	138.815	148.822	161.295	136.558	151.17	197.827	165.405	156.485	180.891	176.619	174.791	53.3364	58.9212	75.4863	62.1684	68.2331	65.3214	49.6563	48.8039	56.1884	41.6143	52.7992	49.475
269	PI	17:00:00	14:00:00			228.24	191.615	217.871	228.882	227.428	239.126	224.04	246.574	255.194	254.629	240.006	237.175	276.179	286.396	324.44	385.776	319.435	326.143	247.923	243.185	406.193	243.72	271.607	265.251
270	PI	17:00:00	18:02:00			91.8825	91.0956	94.2309	95.4378	95.4798	89.0938	80.839	73.5709	88.6265	87.719	90.9339	85.08	78.6763	77.4105	94.4062	76.1903	93.5707	76.0643	107.778	113.164	128.087	116.593	100.266	113.526
271	PI	17:00:00	20:04:00			121.006	151.283	151.386	116.981	136.548	130.096	65.7221	93.6102	82.9405	96.1337	101.444	87.8994	249.603	213.087	376.418	213.37	262.003	273.437	265.707	210.765	304.772	200.596	177.099	276.365
272	PI	17:01:00	18:00:00			171.058	156.433	155.451	162.582	165.101	174.716	114.714	123.956	140.168	137.67	77.5174	135.196	282.282	390.972	366.758	305.595	372.429	379.512	258.362	251.158	286.244	273.768	241.781	270.224
273	PI	18:00:00	14:00:00			1004.43	986.212	971.397	982.266	1084.93	981.38	929.373	1034.75	1006.67	971.974	969.467	951.072	1363.18	1545.93	1592.08	1431.21	1698.5	1515.51	1273.02	1298.31	1397.66	1272.08	1316.88	1218
274	PI	18:00:00	17:00:00			120.718	100.519	101.433	108.951	220.797	121.492	93.9272	114.146	118.169	106.603	119.258	110.721	419.609	404.044	476.08	393.341	531.41	495.145	362.75	380.724	404.83	323.847	343.95	351.457
275	PI	18:00:00	18:01:00			412.983	408.359	406.933	399.91	432.312	401.115	310.268	331.292	375.248	357.577	378.643	359.551	563.039	595.371	772.307	593.036	766.938	681.936	570.223	568.096	659.724	599.284	509.58	576.92
276	PI	18:00:00	18:02:00			233.407	229.705	226.642	239.263	253.012	256.7	224.499	245.076	270.688	261.681	267.316	263.127	344.156	388.17	436.572	359.427	407.104	412.922	477.026	535.501	577.36	541.831	456.637	516.561
277	PI	18:00:00	20:03:00			102.635	104.289	99.6326	96.7047	104.1	107.992	87.7681	85.1639	94.2835	92.5923	101.369	85.6628	367.73	406.421	511.345	425.11	522.578	437.328	268.801	279.065	327.136	290.461	251.934	288.46
278	PI	18:00:00	20:04:00			1038.08	1095.85	1063.39	938.331	1138.18	1078	764.301	875.403	786.633	768.759	951.288	747.016	2576.91	2543.81	3264.05	2675.44	3333.7	3098.54	2174.72	2428.97	2537.01	2337.74	2082.94	2329.95
279	PI	18:00:00	20:05:00			4687.17	4681.42	4993.84	4729.79	4953.43	4705.9	5151.2	4904.86	4991.25	4958.92	5494.52	4819.71	6729.85	7811.84	8395.16	7367.83	8627.19	7783.34	6511.9	7116.52	7469.85	6744.74	6537.18	6598.7
280	PI	18:01:00	18:02:00			155.907	155.177	162.053	166.805	163.111	153.118	157.829	146.696	162.168	164.473	158.016	153.843	31.1133	41.9056	44.2613	36.3096	38.2566	37.7013	53.0706	48.1976	68.807	59.4329	53.2311	45.93
281	PI	18:01:00	20:05:00			957.924	929.803	972.319	1043.06	1001.21	983.503	1062.46	980.945	980.549	1029.48	931.699	914.902	219.722	267.382	303.281	249.62	269.385	262.397	224.436	195.164	260.345	206.995	243.684	223.805
282	PI	19:00:00	20:04:00			44.2136	34.1296	40.4096	31.6354	46.0646	52.5487	25.9399	25.4961	36.1608	31.1719	42.5739	29.89	205.811	210.215	290.134	234.285	292.858	224.338	196.453	246.364	284.136	220.003	222.56	267.921
283	PI	19:00:00	20:05:00			177.9	168.37	171.656	164.271	179.688	193.615	150.899	161.856	156.511	162.646	181.868	152.678	462.333	496.736	604.798	490.163	603.54	563.338	585.881	617.929	681.533	627.662	578.75	603.445
284	PI	19:01:00	14:00:00			17.2136	18.478	18.6053	0.354048	17.1887	18.0997	16.949	21.9889	15.9724	21.4238	23.1112	17.6566	16.6885	19.2311	25.3047	20.8157	32.5765	31.0812	21.7063	13.4453	28.0365	19.0936	24.6132	28.9964
285	PI	19:01:00	18:00:00			64.0245	66.594	57.807	60.8099	66.9685	70.9665	46.8898	53.952	59.457	57.3973	66.9662	56.8554	172.421	223.413	234.513	207.26	223.752	260.915	203.558	203.319	239.9	222.019	168.168	177.386
286	PI	19:01:00	18:01:00			158.351	143.868	152.45	144.001	155.818	165.46	134.732	155.168	184.167	173.61	173.669	167.829	172.421	180.631	230.987	173.978	225.224	214.958	180.07	179.362	227.632	195.31	208.782	195.622
287	PI	19:01:00	18:02:00			63.5358	54.5414	58.7026	58.6985	56.8427	59.3959	75.6071	77.138	89.2551	95.0289	99.8782	83.3318	83.7298	99.243	102.302	90.8766	124.463	90.5287	125.085	117.807	166.294	144.152	116.765	123.384
288	PI	19:01:00	19:01:00			83.574	85.4414	81.0265	86.992	74.9252	29.814	75.4333	78.4756	67.8841	87.1098	92.4246	76.9217	142.989	148.546	168.116	139.256	158.981	161.589	153.973	121.428	170.383	159.287	133.899	157.153
289	PI	19:01:00	20:02:00			20.1013	16.0923	13.8385	12.5898	13.5845	12.0483	19.2337	21.5637	18.7608	16.9328	17.617	14.3633	44.6574	39.2418	0.453093	37.4033	43.6702	42.5125	45.196	0.54918	50.6292	50.3565	40.4994	51.3067
290	PI	19:01:00	20:03:00			58.4941	21.1794	19.5362	30.8295	32.769	35.6646	28.8364	33.0689	35.993	32.9467	38.2355	30.2363	100.397	98.0612	135.901	101.895	126.547	113.987	100.058	113.584	112.344	107.956	96.258	104.927
291	PI	19:01:00	20:05:00			391.478	369.408	370.922	386.819	381.919	397.258	555.094	494.932	509.131	576.874	571.691	491.833	502.005	597.747	682.381	543.112	675.671	667.111	476.273	468.43	543.863	487.44	489.907	487.398
292	PI	20:00:00	14:00:00			243.391	213.603	210.669	242.395	226.102	248.383	223.27	256.829	232.566	238.791	254.913	241.837	389.092	412.362	481.37	384.263	485.776	468.46	384.933	390.691	421.187	368.918	389.007	384.614
293	PI	20:00:00	20:04:00			7.03348	7.37179	6.37298	6.49145	7.16285	8.18008	5.69202	6.49521	6.18821	5.48839	6.322	5.57615	27.4263	28.4892	37.1132	31.2169	39.7351	36.5938	27.7892	27.5343	33.4483	29.3808	26.2972	29.3318
294	PI	20:03:00	20:05:00			13.2185	14.7107	15.0333	13.0214	15.7824	21.0935	16.9391	12.6711	16.1059	17.5111	14.8398	14.0891	20.9747	22.9481	26.2159	20.5585	26.5166	25.2514	17.2501	17.7165	20.5042	16.8437	19.3599	19.1697
295	PI	20:05:00	18:02:00			32.7174	28.177	30.1177	33.4017	34.1381	21.5753	40.4418	36.6197	39.3238	21.8442	38.2217	33.5974	10.1592	19.2891	18.9107	9.62619	15.5216	16.2922	23.8161	15.0281	28.0861	22.0704	18.1323	14.7429
296	PI	20:05:00	20:04:00			13.5422	9.24767	7.16831	6.58749	10.0489	14.5683	11.2635	6.16292	6.67706	12.1137	20.6474	8.70538	13.4654	21.4721	23.9595	21.8007	23.8813	24.7484	16.954	11.1645	10.5547	9.51054	20.6549	17.6451
297	PI	20:05:00	20:05:00			12.917	6.7042	13.9357	12.6092	11.5172	9.38121	12.7336	14.3438	14.283	12.8233	13.5149	9.61817	10.4158	12.754	12.0268	11.1189	12.5557	7.82992	10.0516	6.31036	11.0287	10.3518	8.38581	10.7613
298	PI	22:00:00	20:05:00			14.8427	17.1895	11.739	17.8461	11.1243	11.6387	42.0009	19.9561	10.4896	22.8166	16.59	18.569	16.8024	21.9055	21.4946	18.0421	19.5058	19.4902	14.8184	15.4093	17.8436	14.5932	16.1987	15.3608
299	PS	16:00:00	20:04:00			25.0276	23.0123	12.8408	18.9997	19.6213	21.5143	20.3901	16.8286	22.2456	14.6653	13.3139	23.662	14.1761	20.3941	27.0825	22.6741	22.1035	28.6623	20.8677	20.6486	18.6102	23.2156	16.3884	20.5948
300	PS	16:00:00	20:05:00			67.4543	60.3093	48.2603	66.7442	66.4316	58.5618	66.6852	58.2731	57.9599	73.2714	57.6439	70.2527	18.3556	20.7409	24.2175	20.0522	23.8805	16.4251	15.6072	17.8446	18.136	5.82429	14.1251	15.9589
301	PS	17:00:00	18:02:00			21.8277	44.7066	45.5326	21.2605	51.1723	40.1249	54.0637	29.8151	48.1171	32.2576	32.7524	31.2191	31.7471	30.8919	35.5862	13.5482	33.5972	9.44609	36.7804	40.4418	40.3403	43.5995	25.8807	33.8697
302	PS	17:00:00	20:04:00			43.6861	85.6038	33.0454	40.2554	35.5628	85.2931	68.0899	25.8145	74.1103	44.1753	30.4274	26.1933	195.894	184.47	137.336	160.211	176.067	169.181	96.8694	154.662	185.187	91.9348	79.2566	198.04
303	PS	17:00:00	20:05:00			213.85	205.212	201.277	211.84	236.366	211.146	257.632	233.294	245.524	279.158	233.513	251.619	257.369	255.585	408.297	245.014	311.159	408.453	244.243	239.702	260.813	242.122	214.901	365.548
304	PS	17:01:00	17:00:00			29.9797	30.3062	35.834	27.9527	47.1239	31.6368	40.0905	40.5646	43.2447	52.7938	40.3874	47.2389	40.1801	37.696	53.5833	40.4418	42.6506	47.1328	40.4418	44.5245	50.4416	49.6306	32.6325	43.868
305	PS	17:01:00	18:00:00			108.109	110.315	114.149	99.4508	123.7	119.479	112.333	131.989	141.446	132.145	131.076	148.681	132.786	133.308	174.614	120.199	111.792	96.6746	102.73	105.461	95.4775	183.745	83.4234	152.481
306	PS	17:01:00	20:00:00			525.948	454.014	479.003	427.021	545.524	453.437	519.143	512.292	537.158	613.542	550.251	613.535	473.699	431.355	512.748	434.668	513.857	575.86	463.259	494.337	494.75	453.637	340.541	477.93
307	PS	17:01:00	20:02:00			17.682	21.909	20.5181	10.7962	22.1713	11.1865	26.6025	14.0927	19.4064	22.2885	26.0578	24.018	136.624	95.8317	156.639	133.555	131.682	131.764	104.633	250.092	105.354	137.387	66.3176	129.65
308	PS	18:00:00	18:01:00			141.268	146.985	138.423	142.806	163.625	135.298	164.331	160.611	155.561	167.66	169.26	180.477	132.018	125.813	154.927	144.684	153.628	148.234	147.754	142.623	192.272	182.059	130.267	165.528
309	PS	18:00:00	18:02:00			107.2	103.95	102.589	116.375	137.445	89.1889	120.668	125.812	138.743	147.823	131.076	159.583	101.316	101.185	90.7308	97.1981	104.248	95.9585	158.534	176.772	182.395	179.531	138.425	163.897
310	PS	18:00:00	18:03:00			44.9695	45.7624	55.1959	39.5521	58.9049	39.7143	23.9113	34.7991	37.2385	37.1157	29.3124	39.0629	54.5541	46.0768	75.8484	62.8668	60.3502	80.9202	33.9225	42.9347	69.1389	44.4869	50.7909	62.4171
311	PS	18:00:00	20:03:00			192.797	180.898	147.352	147.918	168.825	151.431	188.901	166.768	167.245	141.71	149.766	147.435	252.435	210.882	274.668	265.544	281.797	285.639	213.633	196.769	244.216	196.298	176.023	193.165
312	PS	18:00:00	20:04:00			320.328	371.76	299.32	333.979	414.811	348.416	280.523	281.349	290.119	24.9803	349.306	299.533	723.438	664.05	984.224	881.968	94.6156	873.834	577.651	861.311	778.434	514.166	522.129	585.165
313	PS	18:00:00	20:05:00			901.614	936.331	886.733	883.185	1046.51	846.841	1050.98	937.162	989.174	1049.65	931.026	995.877	1342.97	1394.69	1515.44	1332.57	1613.85	1210.14	1297.77	1303.91	1369.87	1296.13	1067.5	1183.32
314	PS	18:01:00	18:02:00			17.2161	41.8226	32.0772	23.1988	39.2699	16.9964	45.6476	27.5922	25.2841	42.2351	48.8321	39.9714	115.9	81.912	142.088	110.554	95.332	121.022	79.2671	142.623	100.087	105.358	39.2116	126.388
315	PS	18:01:00	20:05:00			48.3763	51.8236	49.1272	50.2008	64.1409	45.2676	51.9986	55.5962	61.5637	59.833	52.5037	59.3515	10.9869	16.4921	22.9299	17.4821	25.637	20.6278	21.7464	19.4409	22.1971	13.2428	17.2811	20.2463
316	PS	19:00:00	20:04:00			71.7258	132.805	72.164	61.9581	83.8011	73.7517	46.6452	73.5827	69.0458	78.9664	76.9743	47.3437	331.184	206.654	391.703	176.291	251.432	274.269	196.63	218.252	253.583	312.586	175.897	248.211
317	PS	19:01:00	20:05:00			16.1046	8.86058	9.90027	15.2458	13.6086	15.9771	11.1749	10.4881	17.9029	10.7039	13.8024	10.1322	12.7336	12.8435	12.421	15.5539	22.4076	18.0122	6.90999	12.3967	16.6549	9.13138	9.74216	13.0924
318	PS	20:00:00	18:02:00			26.2145	35.5063	33.5509	25.8186	34.3818	36.5416	51.9711	40.3199	40.3566	47.5778	34.1878	53.5467	8.69688	39.1211	25.5774	22.2415	27.7977	43.6955	27.3854	33.2044	50.7226	89.2882	35.8692	76.1138
319	PS	20:00:00	20:03:00			34.4395	60.2026	36.1082	30.3813	40.5161	53.8499	33.8752	9.94198	30.4565	35.2705	59.8151	47.4583	152.18	124.268	187.868	125.868	167.906	164.421	200.726	140.503	154.69	178.868	87.1077	138.867
320	PS	20:00:00	20:05:00			954.078	726.37	901.433	895.616	852.444	658.506	1070.77	905.567	899.267	979.332	1036.08	833.843	873.218	648.257	792.343	587.23	993.952	668.284	729.983	930.141	630.414	640.26	760.475	932.67
321	PS	20:2e	17:00:00			7.5098	10.1417	8.89263	6.934	10.617	5.79964	14.448	6.69321	10.0913	10.3962	13.0648	9.73823	6.93697	4.7026	7.22505	5.86652	6.18993	6.61662	5.56036	7.64997	6.3016	6.32207	2.86895	6.8648
322	PS	20:2e	18:01:00			72.4116	99.9666	92.1421	63.0982	110.231	53.65	142.045	59.8902	98.4606	100.1	119.276	98.0605	48.928	36.567	51.5474	52.171	44.1737	47.0204	36.625	51.3731	40.1022	45.4123	16.0302	27.9167
323	PS	20:2e	18:02:00			40.4082	55.7423	54.5968	37.8248	76.5515	30.107	92.4578	48.9925	63.9462	80.9272	80.3834	64.4747	16.3053	10.6668	13.1598	16.5296	10.3499	12.6807	16.219	28.0711	16.0926	20.6501	5.27726	18.7544
324	PS	20:2e	19:01:00			50.4204	60.6124	62.4205	46.9682	71.0131	41.7337	80.9749	49.2129	71.7742	71.6716	77.1033	64.4993	20.0335	21.1117	26.2755	18.6774	23.3225	21.6031	15.4936	22.1901	24.0306	26.2738	9.19793	22.9872
325	PS	20:2e	20:02:00			15.3081	21.1905	20.1127	14.3245	22.9477	11.3841	34.5484	17.583	26.2779	26.8266	30.527	24.2688	5.89638	5.56536	6.37168	6.69906	4.25438	5.71709	6.86825	10.066	6.6827	7.8976	2.60585	6.94394
326	PS	20:3e	17:01:00			21.2923	28.0849	26.3988	17.3592	29.6156	18.8475	39.0227	18.2043	28.6801	29.576	38.5517	29.2269	24.4957	20.651	30.7354	27.8548	26.0402	25.3671	18.8654	27.2576	18.135	22.5623	9.56743	21.2733
327	PS	20:3e	18:02:00			37.9289	54.2481	48.2603	34.7983	58.2504	27.9346	83.7534	36.2405	56.1581	61.7528	77.1033	60.2599	43.0988	32.3338	40.0151	39.8268	34.2594	35.8475	44.6186	68.0102	46.3063	56.0886	18.097	51.4742
328	PS	20:3e	20:02:00			5.84157	8.11104	6.11638	5.07092	8.4417	4.30579	13.5548	5.45252	7.76219	7.91068	12.6888	8.85375	10.2398	7.57824	9.26944	9.09438	7.51203	8.84961	11.0933	16.2678	11.1101	13.0166	4.57367	13.2492
329	PS	20:3e	20:05:00			20.0864	27.1849	27.2355	17.9091	27.4061	15.0644	43.266	18.9602	29.2124	32.6362	41.8561	30.003	27.7648	21.7947	28.7463	25.9803	23.7136	25.0689	23.3207	34.6393	23.6821	27.2818	10.1205	27.8995
330	PS	20:05:00	18:02:00			4.13406	2.05025	2.25906	3.32169	4.06004	2.10468	3.35707	4.33665	5.86974	2.91676	3.39988	6.0933	1.67935	2.82642	2.17664	1.85051	1.63713	1.32806	4.74843	5.36652	6.12688	5.47806	2.29879	5.67066
331	PS	20:05:00	21:01:00			681.693	676.247	751.371	707.552	818.223	728.714	1135.36	896.961	859.083	982.518	1054.09	926.835	686.424	712.226	828.738	771.725	699.641	686.03	1116.09	1175.24	1033.96	1197.05	882.705	1085.22
332	PS	22:00:00	20:03:00			20.1926	27.884	24.9767	21.8678	26.007	19.0157	29.9065	19.9228	13.0286	28.0275	21.5453	29.6765	16.3221	29.0935	15.5569	19.3972	19.1618	34.7712	12.1756	17.0743	15.9223	12.6245	10.0797	16.7478
333	PS	22:00:00	20:05:00			81.4248	102.918	97.2642	88.1383	89.5207	89.4363	129.633	117.079	135.924	127.529	119.551	129.157	190.756	201.075	237.575	155.479	208.835	197.998	176.632	161.334	200.525	153.033	147.229	186.369
334	PS	1 day, 3:00:00	20:04:00			4.86116	5.07662	4.9184	5.2845	2.72978	5.73797	0.845707	4.91168	3.40878	5.23777	5.64126	2.42709	8.34953	7.74273	22.2385	17.6636	23.4976	9.20465	0.0562983	0.0376293	0.0676814	0.038167	0.0469604	0.0477901
335	SM	d17:1	21:00:00			7.57626	9.89337	9.46358	8.75877	10.0427	7.95249	6.29	3.70973	8.57742	4.67541	6.53713	4.88403	2.8899	3.06417	3.45419	3.17455	2.27513	3.09599	1.59683	2.96732	3.05071	2.50127	2.63935	3.44837
336	SM	d18:1	21:00:00			998.134	928.678	1104.68	1167.29	1091.89	1108.1	1020.59	1163.42	1010.1	1147.06	853.419	1089.5	697.171	727.432	818.731	658.623	788.811	792.541	660.972	697.928	826.501	680.764	839.362	678.636
337	SM	d18:1	22:00:00			101.819	91.9079	96.5632	93.1793	93.6016	114.48	66.0038	119.065	95.049	89.8574	83.5618	89.2347	97.137	103.156	113.953	98.7509	107.4	105.308	92.6385	86.1095	107.854	119.84	102.922	94.795
338	SM	d19:0	18:01:00			28.9176	25.7094	24.2114	21.2519	29.2846	29.7386	18.248	25.3402	21.3123	23.0597	20.5514	19.6964	32.6853	41.0378	36.945	33.1789	38.0189	35.3229	42.1013	37.7083	47.1989	37.0249	53.9327	37.5898
339	SM	d20:0	18:01:00			210.561	191.409	191.292	214.383	224.815	216.017	147.847	196.417	174.208	171.549	153.317	159.357	273.479	313.585	326.889	236.508	280.591	307.129	310.106	296.505	356.471	290.424	350.842	292.702
340	SM	t18:0	17:00:00			6.12741	4.84353	6.14307	5.87119	6.11263	5.58861	6.4746	6.83392	6.20975	5.79598	6.14329	6.21275	7.15722	7.73969	8.41326	7.24352	8.28345	7.53951	9.65082	8.70123	0.171201	10.3315	9.37446	9.6556
341	SM	t18:1	21:00:00			1374.88	1096.95	1199.98	1464.74	1495.89	1351.76	1038.16	1603.98	1602.5	1468.61	1312.65	1185.25	987.544	1261.25	1438.25	1179.66	1300.05	1147.26	1139.51	1422.62	1574.25	1231.96	1467.28	1177.69
342	SM	t18:1	23:00:00			241.033	304.569	251.871	232.135	263.016	236.405	250.401	299.867	291.715	303.095	376.941	271.202	232.229	241.973	287.005	249.786	276.712	264.281	267.051	65.5842	316.225	324.831	342.313	252.568
343	SM	t18:1	23:03:00			18.1102	26.7962	24.5192	19.7856	27.4672	14.8283	41.528	12.5691	25.3961	27.0539	31.7762	23.9007	52.4075	41.4971	63.1109	52.637	59.0313	51.2462	47.5298	77.3732	52.012	63.9147	23.515	64.7391
344	TG	11:00:00	17:01:00	17:01:00		292.557	267.636	268.999	320.334	290.93	285.326	240.23	219.906	191.688	223.812	174.591	194.544	20.7566	43.6053	29.5257	15.3182	22.4656	22.7679	25.7019	23.8465	28.5802	26.3086	42.0474	19.1714
345	TG	11:00:00	20:05:00	22:06:00		6.88987	5.47207	5.45396	8.45427	6.94351	8.71375	4.8533	4.94907	3.6614	5.05585	4.97185	3.61424	0.925328	1.14485	0.921091	0.643372	1.17169	1.17836	0.942031	0.637262	0.844014	0.690057	1.76516	0.862012
346	TG	12:00:00	14:00:00	17:01:00		85.5632	109.328	88.7296	109.658	136.633	89.2956	56.8674	55.451	55.0251	61.2868	57.3427	50.9247	33.9187	42.1737	29.6824	29.9134	28.2549	31.7106	25.6444	34.4494	39.614	40.3875	35.7721	30.6294
347	TG	12:0e	18:01:00	23:00:00		57.9997	53.1466	60.9432	77.8707	66.9859	64.3358	60.3529	85.7252	87.7659	81.73	67.3362	64.5049	3.83881	2.77539	4.00808	1.60536	2.10095	1.91078	4.93095	2.58362	1.99457	1.78851	4.8001	2.47354
348	TG	12:0e	06:00:00	20:05:00		435.638	365.241	378.877	478.433	387.719	486.564	341.049	422.645	367.514	367.906	349.667	376.168	419.762	514.122	473.447	394.715	568.725	483.142	417.146	360.808	461.135	367.564	566.738	378.878
349	TG	12:1e	20:04:00	23:00:00		88.1121	49.6825	73.6285	46.8004	64.3251	62.6046	52.436	60.4887	57.9371	56.7791	52.7593	49.3095	9.44663	12.7138	10.2504	10.1867	11.35	10.2848	6.4998	8.5185	7.05651	8.9368	11.2514	10.4616
350	TG	13:00:00	17:01:00	17:01:00		1012.98	1076.08	1102.38	1212.92	1082.57	1072.88	933.833	782.306	729.852	932.927	584.665	825.772	177.356	209.401	177.343	178.687	170.562	172.295	178.985	180.445	204.316	197.934	189.391	158.527
351	TG	14:00:00	17:01:00	17:01:00		1159.17	1112.93	1139.95	1230.16	1210.08	1027.36	1060.86	942.707	836.475	1000.71	705.762	901.63	218.348	267.171	236.05	231.274	218.728	199.673	241.188	249.052	237.144	250.455	216.085	203.422
352	TG	14:00:00	17:01:00	18:02:00		845.275	808.624	827.971	941.907	879.931	772.448	733.891	787.249	775.747	809.01	596.925	712.246	102.249	148.483	107.479	102.633	115.064	95.571	235.322	217.331	224.056	198.701	246.937	312.535
353	TG	14:00:00	18:03:00	20:05:00		46.7369	40.9928	45.6284	57.5909	52.1365	56.7931	35.2798	43.0126	38.4257	43.5298	35.5637	24.8415	8.33198	11.5458	7.90138	8.00774	10.0823	9.36876	11.0811	8.67531	11.3372	10.3694	16.5561	9.81078
354	TG	14:01:00	14:01:00	17:01:00		70.583	103.621	51.7112	111.549	54.1089	69.1188	101.154	153.926	82.8142	98.2904	125.18	96.3041	10.1726	15.2204	15.9273	12.2649	17.1348	13.0453	15.9854	15.3595	13.9054	13.8181	22.079	13.1501
355	TG	14:01:00	17:01:00	17:01:00		796.587	765.426	743.358	833.736	784.404	773.576	822.887	819.383	737.793	813.852	643.028	750.942	33.9462	46.2077	37.7959	42.6112	44.0085	2.77012	40.5984	38.7043	38.9454	39.5669	42.5074	36.2609
356	TG	14:1e	20:04:00	23:00:00		9.85142	9.81054	8.16659	5.63231	10.8661	13.6407	6.43147	11.1058	9.93207	8.96025	10.2174	7.52406	4.50234	5.14177	4.30228	3.80174	4.71823	4.52221	4.15021	2.65959	4.12783	4.12903	4.2628	3.78965
357	TG	15:00:00	10:00:00	17:01:00		63.361	34.1172	55.8047	42.3747	40.2275	38.4576	29.8087	21.1235	20.1803	40.7084	16.9844	20.3581	8.14338	8.68707	6.20329	9.15253	3.84525	9.01537	3.28577	8.88108	13.4459	8.99297	11.904	8.81577
358	TG	15:00:00	13:00:00	17:00:00		182.273	197.253	199.423	250.782	64.8346	213.716	155.847	171.385	179.49	198.442	142.984	166.514	174.893	178.213	183.979	179.885	180.385	155.335	239.167	259.548	246.554	285.406	213.65	240.763
359	TG	15:00:00	14:00:00	15:00:00		140.075	129.238	143.786	170.05	158.532	143.429	96.6579	105.119	111.636	116.891	88.947	100.979	45.2231	53.2048	44.3986	53.9844	56.4652	44.2518	75.9886	66.2242	68.0536	81.4692	65.9811	58.6695
360	TG	15:00:00	14:00:00	16:01:00		368.262	348.37	391.718	442.375	423.699	370.461	251.008	261.936	255.215	288.41	202.096	241.721	103.544	111.278	102.754	97.6793	96.9488	96.8488	122.058	117.377	124.031	124.683	105.906	98.9679
361	TG	15:00:00	14:00:00	17:01:00		720.623	773.723	852.337	916.112	802.321	774.522	541.058	575.634	541.302	682.712	498.47	635.277	202.143	272.785	188.5	180.031	191.04	217.241	209.663	212.348	209.113	244.304	190.688	190.757
362	TG	15:00:00	14:00:00	18:02:00		461.269	440.738	497.927	573.602	531.91	468.186	337.553	392.402	392.694	402.233	302.446	343.833	92.4964	108.868	84.8529	85.4954	42.4283	85.48	142.481	139.163	150.321	152.966	149.975	79.7541
363	TG	15:00:00	15:00:00	16:01:00		336.521	310.67	357.358	413.408	327.614	345.075	205.305	235.04	259.506	248.8	170.266	202.858	48.8316	57.8084	75.5893	23.9748	61.2809	71.5212	85.3723	80.2478	72.8214	64.9866	88.8352	81.6061
364	TG	15:00:00	15:00:00	17:00:00		421.713	374.521	431.466	460.623	462.256	452.599	381.087	377.004	476.449	452.041	361.236	367.505	653.026	742.15	702.854	661.388	774.354	755.537	870.47	957.499	978.711	991.031	824.306	879.103
365	TG	15:00:00	15:00:00	17:01:00		2043.2	1944.75	2109.26	2275.72	2298.81	2035.52	1628.33	1670.87	1795.1	1852.31	1355.58	1611.64	862.899	955.019	922.244	897.731	949.927	809.752	1019.75	1113.51	1147.01	1180.46	995.998	964.452
366	TG	15:00:00	16:00:00	17:00:00		474.561	516.122	569.5	511.91	612.844	565.773	466.269	500.094	583.3	547.611	474.037	514.248	706.245	736.581	775.81	715.681	751.466	673.584	961.094	1039.54	997.783	1028.54	823.397	941.214
367	TG	15:00:00	16:00:00	17:01:00		1626.98	1552.73	1649.82	1741.41	1757.57	1485.7	1436.36	1411.98	1472.3	1455.08	1217.04	1436.8	652.516	751.877	693.659	643.86	669.018	687.84	738.308	800.913	761.512	784.062	654.793	691.786
368	TG	15:00:00	16:00:00	18:02:00		476.866	426.466	536.482	577.085	552.331	472.074	411.514	520.749	518.857	535.16	446.386	485.359	191.446	217.144	183.102	182.205	167.746	172.292	346.011	357.821	361.056	392.086	318.105	329.679
369	TG	15:00:00	16:01:00	17:00:00		981.349	952.928	1106.44	1196.04	1179.64	1017.86	931.45	858.177	960.814	1081.17	799.596	890.638	333.824	351.241	380.725	350.563	384.942	330.368	432.267	409.26	511.606	497.341	553.406	429.277
370	TG	15:00:00	16:01:00	17:01:00		1443.74	1455.13	1549.71	1718.45	1667.82	1363.81	1007.51	991.723	984.451	1049.16	685.305	899.782	83.7406	163.439	178.493	186.19	102.006	77.4983	204.464	198.224	151.536	221.498	244.542	177.762
371	TG	15:00:00	16:01:00	18:01:00		725.598	719.231	820.85	876.695	849.017	680.934	480.086	517.471	544.192	550.459	355.651	427.126	96.3386	101.02	101.574	98.3887	114.489	96.05	111.938	96.2195	119.399	106.277	124.749	97.3434
372	TG	15:00:00	17:00:00	17:00:00		420.68	381.73	414.454	434.074	465.512	473.111	435.672	417.044	524.345	489.334	458.788	417.465	1120.46	1088	1208.81	1105.5	1162.89	1177.37	1397.98	1540.13	1523.47	1523.35	1224.42	1552.25
373	TG	15:00:00	17:00:00	17:01:00		3530.22	3317.25	3591.57	3741.26	3909.96	3454.34	3226.5	3105.58	3484.96	3362.99	2828.03	3050.66	2901.54	3032.44	3099.24	3009.77	2988.21	2893.48	3337.98	3800.98	3691.42	3733.09	3098.95	3452.95
374	TG	15:00:00	17:00:00	18:01:00		1505.21	1511.42	1664.85	1741.92	1818.48	1577.81	1508.53	1487.92	1711.41	1680.82	1287.76	1424.14	831.278	903.742	967.148	838.208	940.895	883.633	1104.42	1089.06	1187.5	1139.59	1025.42	1099.4
375	TG	15:00:00	17:00:00	19:00:00		190.874	165.103	170.756	204.359	208.86	215.78	195.098	204.837	230.028	231.573	226.501	196.117	762.244	670.769	713.076	650.577	712.867	762.2	887.042	884.246	855.447	904.875	726.432	971.317
376	TG	15:00:00	17:01:00	17:01:00		6334.91	6167.07	5.83585	6615.82	6757.55	5880.39	5356.05	4687.02	5115.87	5090.31	4236.56	4428.29	1919.53	2562.22	2413.72	2392.46	2230.44	2125.65	2153.89	2707.05	2386.47	2726.23	2095.84	2251.95
377	TG	15:00:00	17:01:00	18:01:00		3524.5	4716.37	3731.95	5400.13	5515.99	3165.91	3886.2	2684.92	2974.14	4314.66	1991.7	2472.35	654.562	710.962	713.092	704.15	720.7	612.273	924.435	881.124	949.974	913.312	954.635	819.186
378	TG	15:00:00	18:01:00	18:01:00		2263.9	2435.04	2540.3	2647.69	2750.23	2117.29	1951.37	1897.62	1977.9	2011.64	1470.15	1773.41	530.045	574.251	565.632	557.808	550.182	516.532	603.632	562.183	668.508	582.293	593.075	546.809
379	TG	15:00:00	18:02:00	20:05:00		395.275	281.295	85.8222	508.645	470.408	463.168	386.899	442.07	447.499	459.256	386.185	366.791	215.708	105.436	190.841	243.442	199.722	108.774	294.233	347.875	302.078	299.761	389.049	290.878
380	TG	15:00:00	18:03:00	20:05:00		145.63	132.673	144.961	191.615	165.322	181.197	116.072	142.326	129.902	142.94	124.524	112.995	70.4354	89.3784	76.517	68.9675	85.9767	80.1077	84.7609	75.431	92.9337	86.5399	115.996	76.5936
381	TG	15:00:00	20:05:00	20:05:00		233.742	207.127	144.961	313.551	267.52	281.975	162.569	200.551	107.177	215.734	183.973	159.886	129.822	162.488	118.673	52.3958	116.645	135.408	160.079	135.581	58.8042	147.344	212.54	145.982
382	TG	15:00:00	06:00:00	18:01:00		9.19156	7.12635	9.00388	18.1817	8.98353	9.71384	4.71295	5.78698	4.1032	6.98028	2.93318	5.26931	4.44296	2.42849	3.66294	3.37639	2.3334	1.12025	4.07933	3.27689	5.18318	3.33469	3.60825	5.08898
383	TG	15:00:00	09:00:00	18:01:00		17.951	15.9114	16.4626	22.729	17.5336	18.5977	8.52933	11.2918	10.4106	12.0628	5.81941	8.97883	7.52475	8.31722	5.6428	5.44006	5.12194	5.76522	6.70558	5.26783	5.75051	7.11158	6.2781	6.14661
384	TG	16:00:00	14:00:00	17:00:00		208.708	191.571	207.032	230.005	221.84	86.7494	160.505	177.122	207.162	155.763	159.792	168.071	110.058	52.9139	137.632	96.5375	93.9961	111.324	140.166	166.155	143.921	175.103	135.921	80.8243
385	TG	16:00:00	17:00:00	18:01:00		3257.8	3236.05	3491.25	4184.14	4390.84	3901.18	3481.34	3658.54	3959.85	3693.94	3256.51	3386.69	4470.56	4640.05	5308.56	4917.91	4609.3	4412.88	5156.73	5657.32	5415.42	5228.01	4670.5	5146
386	TG	16:00:00	20:04:00	20:05:00		69.5106	56.1202	69.0357	85.3556	73.3427	76.2453	36.4846	48.8438	43.7684	43.0145	41.5081	40.1731	55.7959	96.0065	49.3751	69.6986	90.4328	58.4011	57.7516	73.8053	60.4185	55.4308	73.8486	53.9091
387	TG	16:00:00	20:05:00	20:05:00		114.79	98.5252	115.251	149.808	120.685	131.317	70.5935	91.5417	87.5369	93.573	78.1507	72.4191	46.6807	61.8619	41.8678	37.53	49.8036	50.6488	53.3598	44.8684	50.9637	46.6637	69.2856	48.5716
388	TG	16:00:00	06:00:00	17:01:00		36.5316	30.1631	33.5189	47.7956	33.7377	41.994	26.554	34.889	31.3611	33.2796	24.5549	29.4817	70.5167	80.4203	64.475	59.0402	77.9272	74.2276	72.7465	74.2562	78.7022	69.3735	97.0668	68.1279
389	TG	16:00:00	06:00:00	18:01:00		58.7837	28.3562	53.3775	43.1475	31.0508	35.3946	31.1538	29.7282	21.0763	32.2776	15.8113	29.3444	11.3019	15.1066	13.1764	25.5541	13.0929	11.2503	17.1603	11.4912	17.7407	11.0442	23.8839	12.2662
390	TG	16:01:00	14:01:00	16:01:00		78.5267	77.2544	80.1404	102.098	88.3335	83.6884	64.6072	63.657	17.4535	64.0369	52.0342	55.6573	28.3241	21.3918	17.0518	26.0299	26.8807	24.6221	34.129	24.9275	16.9053	28.2253	31.6247	25.4042
391	TG	16:01:00	14:01:00	17:01:00		596.963	560.968	552.379	609.61	606.759	616.725	601.941	658.751	604.486	648.046	601.735	587.931	61.4862	54.8485	46.5223	47.4879	53.1653	49.6892	73.213	46.3894	57.119	52.2782	75.6686	46.4639
392	TG	16:01:00	16:01:00	18:03:00		316.959	286.899	320.061	391.358	362.205	362.394	264.726	217.802	311.429	341.469	267.598	274.091	108.553	139.993	117.519	110.884	142.071	129.723	130.216	116.723	169.725	141.971	186.122	145.982
393	TG	16:01:00	17:01:00	17:01:00		2807.91	2553.54	2662.04	3083.35	2816.59	2539.45	2111.13	2205.16	2265.47	2268.12	1709.4	1925.96	397.616	480.322	409.898	423.086	445.389	360.198	476.204	464.954	523.136	486.492	47.6358	386.347
394	TG	16:01:00	18:01:00	18:01:00		1967.61	2194.6	2251.12	2391.33	2400.12	2125.73	2438.44	2640.99	2733.9	2575.75	2383.15	2425.96	1478.57	1658.86	1401.3	1370.91	1544.47	1491.18	2639.66	709.989	2656.75	2707.75	2670.41	2551.04
395	TG	16:01:00	18:02:00	18:02:00		1407.35	1342.13	1449.61	1683.89	1578.07	1547.3	819.631	1132.14	1077.38	1099.85	924.429	931.103	665.683	747.163	632.348	601.943	726.083	692.544	685.114	640.513	737.935	729.65	796.124	675.198
396	TG	16:01:00	18:02:00	20:05:00		288.812	267.306	291.356	278.712	190.871	322.694	155.95	169.282	217.439	162.793	112.513	124.013	90.8755	111.07	87.778	81.8837	99.345	95.8709	99.2536	89.7369	113.458	103.226	142.894	97.1431
397	TG	16:01:00	06:00:00	17:01:00		43.8587	44.2808	45.7012	54.4019	49.0471	51.1432	43.8399	49.1097	43.5494	50.3339	39.1312	38.7322	63.2841	55.4833	58.6469	52.6571	65.5588	64.8738	51.8447	66.4009	60.4413	67.3421	69.5485	45.9267
398	TG	17:00:00	17:00:00	18:01:00		1007.13	988.01	1029.04	1172.88	1148.18	1068.83	994.363	1050.17	1134.85	1085.24	895.493	914.932	800.909	801.318	851.666	735.867	809.847	790.62	990.243	939.512	986.886	955.775	865.722	971.312
399	TG	17:00:00	17:01:00	17:01:00		8308.51	8296.8	8568.52	8815.49	9210.29	7889.86	7713.71	7330.58	7670.7	7848.63	6227.57	7157.42	6250.38	6858.58	6535.01	6395.94	6299.57	5978.14	7035.83	7814.49	7461.61	7419.02	6264.87	6600.63
400	TG	17:00:00	17:01:00	18:01:00		4899.78	5072.01	5389.37	5500.61	5848.81	4595.57	4330	4245.71	4497.15	4393.95	3212.25	3961.62	1500.96	1771.82	1831.92	1693.16	1730.79	1599.09	1721.56	1692.39	1856.35	1829.07	1723.28	1760.41
401	TG	17:00:00	18:02:00	20:03:00		1517.48	1511.46	1607.47	1753.56	1758.41	1506.58	1562.89	1671.25	1599.22	1654.39	1299.97	1410.75	643.561	771.249	661.196	623.852	705.089	664.094	933.227	1463.08	982.355	938.904	1045.88	918.031
402	TG	17:00:00	19:00:00	22:00:00		2.37066	3.98899	2.40203	1.79755	5.2431	3.02462	5.54635	4.36999	2.57021	2.09147	5.08296	1.6859	40.9395	38.4588	36.4443	33.6647	34.1304	35.9426	37.812	30.9685	33.7129	33.154	30.0647	36.6086
403	TG	17:00:00	20:04:00	20:05:00		587.414	506.621	584.148	695.619	658.28	687.124	381.816	489.516	446.101	477.792	418.122	380.234	618.727	755.197	612.136	553.202	697.25	674.456	641.196	559.23	631.857	610.87	786.517	635.167
404	TG	17:00:00	22:00:00	22:00:00		0.79717	0.601877	0.746343	0.586666	0.725928	0.816629	0.386307	1.11323	0.659987	0.704126	1.54261	0.679742	12.5796	12.1305	11.4755	9.48664	10.5219	9.92756	6.83766	5.2962	10.4091	6.17816	8.72668	9.59004
405	TG	17:01:00	17:01:00	17:01:00		7605.73	7612.03	7694.59	7646.28	8168.17	6834.73	7032.58	6501.34	6656.08	6980.93	5741.72	6526.43	3413.24	3842.46	3552.42	3634.37	3390.58	3179.7	3693.55	4099.64	3846.29	3791.83	3402.92	3122.92
406	TG	18:00:00	14:00:00	17:00:00		309.305	321.54	362.774	385.29	397.867	344.839	250.688	290.883	339.16	298.734	302.169	276.375	371.874	427.18	342.541	406.044	402.7	376.262	493.254	525.674	527.224	502.368	419.873	519.403
407	TG	18:00:00	15:00:00	17:00:00		561.415	530.115	581.02	623.497	635.239	622.786	535.673	532.554	660.539	621.505	525.638	571.733	1782.13	1545.46	1784.99	1650.14	1623.03	1669.51	1954.71	2342.35	2174.99	2059.44	1583.07	1961.94
408	TG	18:00:00	15:00:00	17:01:00		2681.7	2619.95	2759.74	2780.8	2959.75	2526.87	2238.77	2377.5	2488.26	2445.04	2053.17	2359.47	2171.99	2479.52	2438.08	2265.35	2372.62	2197.6	2542.56	2818.21	2693.08	2663.21	2235.94	2442.93
409	TG	18:00:00	16:00:00	16:00:00		46.0832	34.7839	35.0592	70.9233	46.3834	41.2567	9.31292	45.3083	46.8892	19.1152	30.5368	35.1297	16.7827	22.1454	15.6894	16.7189	13.6407	17.3169	9.24967	12.007	5.34956	17.5633	21.1132	13.8065
410	TG	18:00:00	16:00:00	17:00:00		371.96	222.445	236.74	404.075	410.207	395.932	252.744	336.355	330.997	313.59	304	310.278	958.247	953.899	926.63	845.436	922.461	852.533	1132.89	1111.73	1081.35	1150.81	910.109	1072.62
411	TG	18:00:00	16:00:00	17:01:00		651.002	615.729	641.504	660.739	694.287	543.553	405.501	543.391	570.903	561.114	367.885	564.242	502.557	566.3	545.56	531.124	513.612	480.488	555.43	607.838	560.236	579.6	491.06	514.916
412	TG	18:00:00	16:00:00	18:01:00		2801.77	2714.64	2784.38	3020.12	3094.08	2829.72	2186.85	2620.96	2469.45	2419.38	2157.65	2307.63	4432.34	4533.06	4344.65	4030.84	4363.29	4014.66	4752.96	5093.76	4806.9	5132.42	4161.97	4601.78
413	TG	18:00:00	17:00:00	17:00:00		349.987	320.202	335.569	378.728	374.479	421.842	256.014	331.694	323.795	320.22	303.599	288.644	1712.4	1630.13	1482.26	1471.29	1622.67	1597.54	2076.29	1998.29	1961.39	2043.45	1681.81	2043.04
414	TG	18:00:00	17:00:00	18:01:00		1973.65	1925.18	2193.52	2393.32	2681.89	2503.3	1653.93	1970.08	1964.06	2075.04	1890.93	1945.2	4066.52	4061.99	3996.73	3652.38	3880.11	3833.43	3913.66	4741.3	4801.16	4734.7	4100.32	4816.65
415	TG	18:00:00	17:00:00	20:00:00		21.9724	16.5997	18.1998	27.0247	20.4196	31.1757	6.06436	22.2117	15.7661	15.924	13.9629	13.5299	165.627	182.61	146.611	144.172	154.158	142.479	208.682	171.058	187.991	180.902	182.786	182.254
416	TG	18:00:00	17:01:00	17:01:00		2422.26	2392.24	2467.73	2496.11	2629.04	2238.86	2086.04	2123.48	1991.17	2090.16	1625.82	2014.31	2124.19	2388.46	2246.51	2107.99	2146.86	1958.66	2191.53	2386.99	2248.44	2245.62	1944.22	1945.55
417	TG	18:00:00	17:01:00	18:00:00		555.54	517.756	515.195	565.507	586.068	553.727	363.067	526.134	451.655	445.959	398.285	454.06	1314.61	1371.7	1293.38	1213.47	1265.89	1165.26	1389.85	1453.16	1388.09	1408.21	1308.79	1315.52
418	TG	18:00:00	17:01:00	18:01:00		7159.05	7179.4	7491.96	7618.08	8281.03	7084.97	6142.9	6868.28	6677.43	6749.89	5488.72	6207.28	8673.03	9218.91	8950.85	8407.53	8178.09	8088.11	9683.67	10631.7	10215.6	10265.8	8585.57	9500.63
419	TG	18:00:00	17:01:00	18:02:00		464.565	548.082	620.942	561.673	635.119	535.07	584.752	775.964	726.174	710.152	724.647	747.765	1048.08	1167.99	968.566	983.134	1036.54	923.571	1672.02	1744.39	1691.34	1743.37	1632.46	1602.4
420	TG	18:00:00	17:01:00	19:00:00		1545.06	1516.34	1527.81	1738.17	1728.24	1673.3	1043.39	1517.44	1243.86	1263.12	1143.8	1219.57	4158.58	4385.82	4000.85	3736.51	3919.57	3725.65	3107.07	3227.52	4508.08	4626.84	6076.5	2920.44
421	TG	18:00:00	17:01:00	20:04:00		526.225	520.616	268.392	577.166	599.666	560.897	425.937	505.69	461.533	391.763	436.367	376.203	1198.78	1243.26	1172.3	1091.78	1300.13	1248.13	1187.97	1154.22	1203.76	1196.29	1248.82	1198.28
422	TG	18:00:00	17:01:00	20:05:00		521.32	519.206	546.821	565.546	604.163	541.548	456.468	547.733	490.982	506.897	425.712	474.273	629.744	801.374	640.978	599.477	702.463	651.168	645.563	607.969	647.974	624.979	712.056	613.786
423	TG	18:00:00	17:01:00	21:00:00		444.207	328.856	340.127	487.725	258.47	465.188	254.507	230.722	346.474	352.026	279.729	346.612	795.423	827.452	773.746	716.407	723.384	713.135	827.78	816.001	790.905	817.238	720.441	781.868
424	TG	18:00:00	17:01:00	22:00:00		63.4057	63.5566	62.6	75.6255	68.6914	75.3438	37.6811	57.9254	45.1977	48.7045	44.7138	42.9882	344.916	369.344	340.346	314.048	303.725	312.323	359.838	341.026	343.301	330.527	326.474	338.582
425	TG	18:00:00	18:00:00	20:00:00		9.81026	8.46454	9.81744	10.6313	10.6425	11.9395	5.61882	8.50272	7.85945	7.07583	8.21634	7.47428	112.677	41.7947	102.195	91.6036	99.3254	98.1592	121.414	110.568	112.285	109.148	104.592	112.597
426	TG	18:00:00	18:00:00	20:03:00		1.24825	1.09861	0.594195	1.48646	1.37818	2.56526	1.37623	1.36935	1.386	1.30896	1.35471	1.32074	0.477856	8.57631	9.90389	8.35896	9.75101	9.79382	11.1111	11.2496	9.13195	10.464	7.66104	12.1696
427	TG	18:00:00	18:00:00	20:05:00		134.616	138.971	134.34	140.517	141.425	148.622	104.533	138.013	112.227	109.72	113.425	116.086	455.758	568.406	557.275	402.107	477.066	449.637	496.268	461.69	484.27	460.98	504.332	464.366
428	TG	18:00:00	18:00:00	21:00:00		3.58865	3.15157	2.16022	3.27921	1.25571	3.6948	3.68334	2.7544	4.27103	2.75848	3.87534	2.98398	58.3377	68.8183	46.8697	46.4227	50.2542	47.1523	64.5575	48.3479	57.1608	56.6098	65.8165	56.7554
429	TG	18:00:00	20:00:00	20:05:00		46.0141	44.6442	42.7705	49.5875	50.7988	1.0485	33.0907	45.9326	35.632	40.1027	39.2274	40.1731	140.318	159.274	122.138	114.296	136.829	126.622	146.685	135.256	133.751	144.516	156.103	141.445
430	TG	18:00:00	20:03:00	20:05:00		122.378	119.518	126.589	134.711	63.4234	133.353	85.8661	97.7954	89.9217	91.8524	85.6009	82.2273	569.007	351.488	565.937	536.143	615.991	302.342	283.268	549.476	585.736	585.417	332.619	555.104
431	TG	18:00:00	20:04:00	20:05:00		117.728	111.261	111.519	131.227	131.957	135.389	60.242	135.857	68.0375	73.1908	66.7474	69.4632	245.005	297.258	213.959	203.978	261.6	260.996	243.742	208.086	232.911	230.207	330.217	228.713
432	TG	18:00:00	20:05:00	20:05:00		192.133	179.137	189.453	236.905	220.93	229.041	126.763	169.282	139.582	156.176	129.694	127.506	278.979	371.573	253.228	235.903	288.336	284.253	320.598	276.689	318.235	282.81	415.473	298.902
433	TG	18:00:00	06:00:00	20:04:00		11.0116	8.7889	13.8081	5.20588	11.1804	7.79708	6.37734	8.80978	11.2217	12.1301	6.70834	10.5778	23.055	12.2695	39.1536	20.2189	15.9938	19.3473	15.9566	34.7568	21.8572	26.3296	7.40191	16.229
434	TG	18:0e	15:00:00	18:01:00		77.2091	69.4029	84.3803	95.7978	94.5191	80.9189	75.3282	102.531	113.057	97.265	94.405	81.9439	6.45409	9.27645	7.69967	8.10558	7.22556	5.44129	17.9106	9.87871	8.70865	9.46485	8.13871	7.99641
435	TG	18:0e	16:00:00	18:01:00		89.2681	105.587	94.0772	128.847	105.566	82.8076	82.0321	116.397	140.212	110.034	107.256	104.711	13.2294	11.2907	18.6516	11.6394	11.3478	10.3724	14.0506	18.5327	11.9189	20.7871	11.0793	18.7285
436	TG	18:0e	17:01:00	17:01:00		193.518	197.132	196.777	212.539	225.965	203.809	139.065	186.643	192.293	181.544	155.142	150.515	21.9061	23.018	34.0684	13.3607	11.1328	27.1253	12.9946	16.9091	18.2487	35.0656	18.0887	20.2608
437	TG	18:0e	17:01:00	18:00:00		52.2142	36.4597	45.6316	47.5802	44.7617	54.6349	33.8151	55.1876	38.9534	49.9074	41.2526	43.8708	9.1369	12.7433	7.75096	6.29971	8.06823	8.24675	11.3609	10.4149	11.6099	11.3055	10.7149	8.35971
438	TG	18:0e	17:01:00	18:01:00		544.764	531.797	589.963	654.329	656.696	592.2	426.167	555.348	555.738	531.847	422.117	430.063	14.2024	32.3202	28.5054	37.9857	15.9272	14.794	30.7136	46.0529	44.2359	29.7337	31.5973	27.9336
439	TG	18:0e	18:00:00	18:01:00		57.0171	66.7442	60.986	74.0817	82.3457	65.7515	53.6075	71.8016	67.7454	70.6625	60.8036	62.5967	11.6203	13.515	9.37534	10.2266	11.1583	10.1453	13.6513	12.2856	15.6276	12.605	12.1137	11.7336
440	TG	18:0e	18:01:00	18:01:00		229.238	228.297	248.348	300.488	275.486	246.071	189.549	270.48	245.977	247.606	194.48	207.675	20.8056	27.6828	18.4298	21.4335	15.7551	16.4708	27.312	59.1277	32.8322	25.3847	27.9529	23.0661
441	TG	18:0e	18:01:00	20:04:00		34.2658	31.9087	32.5802	35.1874	68.9842	38.1736	28.1695	36.6598	33.5277	33.3528	32.2334	0.108561	3.36985	6.88917	5.25513	3.67989	3.48625	3.66945	2.96443	2.56205	4.17395	3.02607	4.03465	2.85558
442	TG	18:0e	18:02:00	19:01:00		138.287	137.571	152.137	173.034	166.825	210.718	138.302	193.003	178.16	186.617	153.565	150.481	12.8441	12.6536	13.0801	13.4036	10.7733	10.6466	17.9842	18.6302	23.5217	37.8966	16.8111	22.7379
443	TG	18:0e	19:01:00	20:03:00		9.521	7.9212	8.59716	10.1614	10.0996	10.2814	8.80721	11.4292	11.3349	10.5882	10.4454	8.55862	3.50796	4.19777	3.66704	3.28997	2.962	3.54025	2.92052	2.81241	3.06704	2.94122	2.98997	1.30236
444	TG	18:01:00	17:01:00	17:01:00		7806.64	7890.58	8233	8249.39	8940.9	6911.29	6846.47	6533.94	6538.12	7054.66	4842.82	6094.81	1954.83	2291.51	2107.46	2120.99	2005.18	1871.27	2283.8	2242.38	2478.29	2348.71	2019.98	2108.04
445	TG	18:01:00	17:01:00	18:01:00		3031.1	3292.62	3489.11	3460.51	3686.55	2675.84	2507.05	2476.49	2438.11	2601.45	1706.06	2281.73	670.741	713.349	779.137	435.909	725.928	655.34	605.709	685.058	636.08	629.212	496.581	532.857
446	TG	18:01:00	18:01:00	18:01:00		5995.5	6226.67	6514.92	6177.26	7122.52	5669.23	5479.67	5627.58	5498.04	5875.19	4027.87	5171.47	2814.08	3332.05	2852.19	2750.76	3011.25	2761.67	3642.48	3540.54	3594.62	60.5302	3312.86	3386.04
447	TG	18:01:00	18:01:00	18:02:00		1289.35	1373.96	1415.04	1607.59	1567.75	1143.98	1106.63	1223.15	1049.49	1137.83	824.639	997.491	62.3482	93.3062	46.7254	75.0002	76.8848	73.1853	137.617	104.995	142.192	105.074	144.703	84.4893
448	TG	18:01:00	18:02:00	20:05:00		1086.72	1025.84	1105.14	1323.88	1265.46	1150.3	795.874	1072.84	889.397	1007.2	681.158	673.135	200.257	261.105	179.31	140.859	194.234	193.292	219.588	139.157	211.003	299.779	402.265	282.889
449	TG	18:01:00	20:03:00	20:05:00		367.134	349.876	575.536	452.907	419.316	647.424	242.665	331.016	430.67	308.381	402.917	241.845	189.485	337.429	167.182	239.802	301.443	179.338	194.335	164.843	181.025	170.534	447.895	199.624
450	TG	18:02:00	11:01:00	14:04:00		4.7357	3.27519	3.58927	7.80628	3.33397	5.22256	3.5098	4.66047	3.24256	5.14445	3.60202	4.28071	3.61996	5.2119	3.17785	3.38574	4.50963	3.48467	7.68607	7.39485	9.2477	7.21394	16.1785	8.35291
451	TG	18:02:00	13:00:00	17:01:00		424.6	415.596	452.048	536.478	509.424	458.042	356.285	398.906	391.337	404.935	314.666	338.517	109.767	130.449	121.675	78.9338	118.845	156.947	156.651	146.027	156.9	172.061	170.446	148.752
452	TG	18:02:00	17:01:00	17:01:00		3659.42	3604.04	3855.19	4068.45	4100.11	3605.84	3458.12	3819.41	3730.4	3941.33	3021.06	3337.28	1262.37	1944.75	1278.27	1377.49	1754.45	1246.83	1486.52	1767.8	2272.52	2009.67	1451.52	2085.44
453	TG	18:02:00	17:01:00	18:02:00		1860.13	1819.34	1980.64	2171.62	2194.25	2015.55	1696.94	2156.45	1992.01	2170.56	1626.86	1813.82	588.303	704.96	531.246	528.796	566.15	596.892	862.948	809.542	922.386	899.296	981.03	819.272
454	TG	18:03:00	14:01:00	17:01:00		148.077	129.454	139.22	178.84	165.322	159.82	124.387	138.013	126.115	149.558	119.811	114.742	18.2856	38.3624	30.8955	23.5416	36.4352	26.358	32.9382	35.4396	23.9829	28.281	35.3032	26.3407
455	TG	18:03:00	17:01:00	17:01:00		93.1296	96.0061	95.0137	109.395	107.158	97.3171	72.9692	83.3471	82.4867	86.0289	68.724	75.375	58.0056	75.7206	52.84	53.6143	55.046	54.0081	58.6299	55.5979	64.3387	64.4807	73.8486	55.7772
456	TG	18:03:00	17:01:00	18:02:00		974.082	939.018	1037.64	1230.94	1155.69	1068.82	829.745	1042.61	956.685	1036.26	801.215	842.367	430.75	367.464	430.072	292.305	348.483	307.361	419.293	373.751	458.778	426.892	501.871	381.486
457	TG	18:03:00	17:01:00	20:05:00		307.168	281.301	314.32	391.358	362.205	378.682	217.211	268.479	246.899	266.028	241.75	209.599	206.887	253.071	208.473	188.381	235.649	231.537	226.175	202.883	244.441	227.945	285.788	218.038
458	TG	18:03:00	18:02:00	20:05:00		143.182	126.935	141.372	186.969	163.819	185.269	91.1267	132.622	111.104	129.838	113.729	103.187	52.7575	79.5367	90.9541	46.0596	65.7931	79.0741	88.2743	66.6524	95.2398	85.9743	128.485	74.4586
459	TG	18:03:00	20:05:00	20:05:00		68.654	58.7792	64.1558	86.633	75.4468	91.0058	40.727	54.1271	47.2755	56.1173	50.6307	42.9946	45.5758	63.067	48.5089	43.1352	53.2112	53.4913	55.7753	44.2182	55.5758	51.4714	80.573	48.0378
460	TG	18:04:00	18:00:00	18:00:00		13.7063	16.5142	17.7971	14.6324	17.2836	14.5569	16.5453	14.3404	18.2368	16.9411	19.0055	17.0635	19.5562	16.3492	19.4324	16.5473	21.1796	20.4662	13.6364	23.8973	15.7964	23.5864	13.0886	23.0048
461	TG	18:04:00	20:05:00	20:05:00		11.1609	9.72657	10.3482	14.9808	11.9482	14.3533	6.71996	9.35903	7.98213	10.4161	9.67001	8.08837	6.62921	9.17886	6.92984	6.14128	7.62781	7.41643	7.92712	6.30759	8.09423	7.63587	12.0079	6.75198
462	TG	19:00:00	20:04:00	20:05:00		101.451	118.258	114.103	204.389	126.396	121.137	159.853	116.449	102.407	104.558	159.646	82.0929	229.536	269.139	214.248	188.138	225.689	249.884	180.94	159.966	185.176	173.363	219.745	192.952
463	TG	19:01:00	11:01:00	14:04:00		1.76726	1.07133	1.23135	2.5617	1.21285	2.14243	1.46781	1.88274	1.50866	2.00104	1.66271	1.43925	3.49938	5.18258	3.3694	3.28	5.23407	5.15605	4.40634	3.60871	4.46593	3.92284	7.31156	4.84745
464	TG	19:01:00	17:01:00	17:01:00		5341.56	5277.18	5501.71	5172.35	5798.78	4842.66	4758.56	4581.75	4731.25	5065.52	3969.9	4549.14	5309.01	6031.3	5777.97	5624.4	5138.19	5017.02	5559.14	6602.41	6159.91	5856.43	4947.57	5230.39
465	TG	19:01:00	17:01:00	18:00:00		1517.34	1427.33	1492.5	1544.4	1622.96	1537	1158.8	1358.45	1259.59	1376.28	1096.05	1233.21	2982.65	3193.22	2944.67	2680.26	2725.62	2686.99	3095.79	3234.58	3066.63	3025.57	2701.58	2855.1
466	TG	19:01:00	17:01:00	18:02:00		2643.3	2644.99	2741.26	2856.75	2990.73	2544.85	2986.55	3126.82	3100.2	3136.67	2478.24	3426.05	1842.16	2691.26	1966.12	1778.83	1881.85	1852.6	2503.13	3065.8	3758.68	2969.29	3230.04	3575.94
467	TG	19:01:00	17:01:00	19:01:00		1798.8	1735.21	1822.6	8.91456	1953.59	1760.95	1550.79	1692.7	1641.15	1773.33	1381.88	1518.05	3452.2	3695.33	6034.2	3338.24	3040.15	3048.75	3469.07	3901.08	7724.83	7805.04	2917.72	7151.79
468	TG	19:01:00	18:00:00	20:03:00		107.448	219.722	228.205	235.744	252.491	242.275	190.059	246.915	87.6772	222.352	209.821	200.194	627.013	437.854	736.295	358.241	403.671	400.539	364.516	360.898	373.58	381.794	349.43	368.29
469	TG	19:01:00	18:00:00	21:00:00		146.82	138.934	141.479	168.361	163.775	163.865	95.1502	139.066	116.12	119.341	112.926	115.908	278.871	293.174	288.63	246.039	497.932	256.236	274.397	255.444	281.246	267.711	276.139	263.3
470	TG	19:01:00	18:01:00	20:03:00		666.959	376.467	401.871	462.198	441.859	366.466	436.118	417.275	398.405	444.703	346.661	354.706	191.419	239.012	216.269	192.768	223.067	188.899	245.938	242.875	260.583	234.732	250.965	232.183
471	TG	19:01:00	18:02:00	19:01:00		1529.69	1213.34	1607.45	1707.09	1833.53	1241.89	1586.61	1779.06	1683.37	1786.72	1429.18	1232.03	1447.28	1775.46	759.294	694.46	1583.14	715.705	2176.04	2103.52	1644.13	1235.78	1139.51	2126.91
472	TG	19:01:00	18:02:00	20:04:00		666.959	1034.23	694.662	756.007	1250.43	674.909	641.45	1076.07	649.512	1056.17	554.961	866.611	839.7	994.209	822.918	740.852	804.721	850.176	959.598	884.364	1007.74	950.242	1108.33	968.763
473	TG	19:01:00	18:02:00	20:05:00		815.037	769.728	816.659	961.557	930.31	892.752	588.845	862.583	768.753	697.496	707.006	662.386	803.792	962.073	490.864	694.549	838.797	573.675	718.052	842.096	758.69	707.025	883.781	725.905
474	TG	19:01:00	18:02:00	22:00:00		196.996	186.099	196.594	140.49	222.391	220.872	146.06	219.934	180.932	130.857	112.776	175.968	342.404	347.406	233.483	210.949	224.016	223.421	414.936	296.089	306.615	305.328	315.766	389.536
475	TG	19:01:00	19:01:00	20:02:00		190.909	193.132	226.77	291.486	229.947	215.808	191.756	235.054	194.994	284.557	173.33	177.353	256.882	327.386	237.058	255.887	239.057	281.669	388.67	367.401	368.968	308.263	296.595	376.296
476	TG	19:01:00	20:03:00	20:04:00		87.0107	89.7083	90.1339	101.265	103.702	93.4489	96.5569	95.6389	89.2203	98.3377	80.8875	78.4652	132.86	167.107	142.062	131.111	72.8705	149.104	134.607	126.152	136.518	128.396	153.701	152.653
477	TG	19:01:00	20:04:00	20:05:00		141.958	134.912	143.525	168.389	168.327	173.053	63.9753	119.683	110.964	115.543	98.5246	88.9452	241.138	305.292	137.731	213.239	269.988	159.699	125.385	110.545	130.292	125.002	172.914	133.171
478	TG	19:01:00	20:05:00	20:05:00		193.357	172.139	192.324	238.067	225.439	239.221	157.308	196.238	172.549	201.175	167.249	145.107	193.628	261.105	185.084	170.591	214.68	224.043	217.611	189.878	222.303	201.078	296.595	222.041
479	TG	19:01:00	20:05:00	22:00:00		17.6224	18.7534	20.3806	22.4131	22.9947	24.8383	16.9356	26.4166	20.762	23.8234	21.2862	19.885	59.3867	70.0968	55.7275	44.8411	60.2885	63.0525	56.2144	34.7893	50.5025	44.684	62.9214	57.9123
480	TG	19:01:00	06:00:00	17:01:00		41.8102	38.1585	39.7086	53.6158	44.5803	47.7078	33.5358	35.1172	30.8171	33.8292	27.1606	30.9809	28.0329	32.852	19.8624	19.8536	24.1118	24.0202	26.6762	24.7607	29.1675	29.2689	32.6056	30.0175
481	TG	20:00:00	20:05:00	20:05:00		17.8672	21.5524	17.223	21.8325	20.8906	19.952	13.7454	17.036	14.3089	15.6176	13.8208	13.5702	47.5094	44.9905	31.1843	27.5383	32.7655	33.0767	37.5495	34.139	37.8192	35.3513	39.6261	38.964
482	TG	20:03:00	17:01:00	17:01:00		1333.86	1291.68	1361.99	1439.96	1472.79	1394.56	1230.2	1293.83	1345.25	1319.48	1115.93	1163.46	1273.16	1454.03	1299.14	1198.83	1420.52	1371.97	1253.69	1215.8	1337.34	1343.15	1380.83	1278.14
483	TG	20:03:00	20:05:00	20:05:00		135.839	131.274	127.307	169.55	151.795	174.071	67.3693	94.0216	87.9577	90.1319	80.1273	71.8817	162.968	208.884	165.45	153.045	196.331	189.933	176.768	149.236	190.71	173.08	253.367	176.672
484	TG	20:05:00	14:02:00	17:01:00		18.9602	14.9654	15.635	24.3803	20.5791	25.8495	13.5293	15.3045	11.4384	15.6073	13.7645	5.57849	1.90895	4.00008	2.14281	2.1901	3.90581	3.59041	3.29381	2.24147	3.92025	2.4327	6.78565	2.77519
485	TG	20:05:00	17:01:00	18:02:00		905.596	818.711	909.95	1088.14	985.918	1004.73	760.237	936.981	761.739	1015.14	699.403	808.837	458.521	590.5	441.777	489.84	500.657	475.478	568.732	526.717	687.202	656.119	719.273	485.716
486	TG	20:05:00	17:01:00	20:04:00		597.204	533.212	589.889	744.394	677.818	632.154	395.391	498.142	455.921	500.291	430.285	381.578	480.618	590.5	447.552	399.67	498.036	516.824	520.423	448.684	523.473	483.605	672.442	512.403
487	TG	20:05:00	17:01:00	20:05:00		431.137	385.984	419.524	529.669	464.854	499.107	323.949	376.194	340.608	382.498	309.258	298.275	192.993	266.528	187.279	169.251	227.786	221.201	222.003	196.056	220.919	201.078	291.552	213.501
488	TG	20:05:00	18:02:00	20:05:00		258.217	251.911	254.04	370.455	318.62	351.197	196.847	244.758	218.842	256.763	199.178	197.507	160.206	193.62	153.323	138.666	166.711	166.417	252.526	197.356	217.23	229.359	333.82	222.575
489	TG	20:05:00	20:04:00	20:05:00		57.6432	38.2874	22.3019	54.4029	27.4008	60.2624	26.0476	36.0021	28.4247	20.0615	34.3851	25.818	38.0435	49.7755	36.4351	42.3698	41.1772	32.4375	49.3026	36.1593	44.7797	47.9577	37.5511	43.345
490	TG	22:00:00	18:02:00	20:05:00		34.1434	24.2115	26.9828	30.0777	28.7058	26.3652	27.1513	29.9748	27.9164	30.8381	26.7598	25.5281	42.5374	49.2083	38.6916	37.0426	39.0565	43.9301	51.8227	41.6171	52.5779	47.7949	55.1163	49.906
491	TG	22:00:00	20:03:00	20:05:00		6.63288	3.98859	4.66457	4.86585	5.45561	7.26825	3.08846	5.61757	4.96603	4.38086	5.80809	3.18429	18.8933	16.068	10.8279	13.3548	20.1311	15.1688	12.3189	12.8428	15.9579	8.9368	15.13	12.5966
492	TG	1 day, 3:00:00	17:01:00	17:01:00		138.287	134.213	139.076	142.84	154.801	141.497	86.3752	125.075	109.982	117.132	98.5246	105.471	229.26	247.046	229.84	218.844	204.457	205.438	210.145	208.411	290.562	200.795	210.138	166.798
493	TG	1 day, 3:00:00	18:02:00	19:01:00		8.19932	5.05222	9.84583	15.0969	6.59783	6.68801	6.14299	9.03556	8.66952	7.68966	10.7495	8.28991	18.6999	11.9506	13.4266	16.133	7.20841	13.9543	17.6988	16.7119	17.2262	24.0671	20.5335	16.7065
494	TG	1 day, 3:00:00	19:01:00	19:01:00		8.26051	7.6553	8.19529	8.33814	9.24298	9.31435	5.05694	7.64465	6.74763	7.01467	5.62564	5.09218	47.5094	50.2126	47.9314	41.9167	40.6292	43.6716	36.232	39.016	40.3558	40.4418	39.2658	38.6971
495	TG	04:00:00	18:00:00	19:01:00		18.6965	17.3234	21.2113	23.3191	19.8027	21.5588	16.6914	19.0637	15.9636	17.1721	14.6219	15.4157	50.1818	50.157	44.084	35.9853	53.912	51.851	39.6733	51.9296	54.8081	49.1179	57.9626	39.1422
496	TG	04:00:00	18:01:00	18:02:00		21.02	17.1816	17.7649	32.9565	18.7485	22.0665	20.4901	28.8743	20.8718	22.7289	16.9917	21.0566	9.95922	13.0366	8.64964	8.29587	11.0234	10.2413	17.3808	15.7042	16.7769	15.2318	22.4171	15.2248
497	TG	06:00:00	14:00:00	17:01:00		19.8559	16.1321	17.6952	25.3553	18.6661	21.7106	16.8164	20.2003	18.2808	19.0782	17.5194	17.6163	26.3265	29.1379	23.4206	22.8262	28.0227	28.3827	30.0614	30.0272	31.5693	28.8241	37.946	28.2585
498	TG	06:00:00	17:01:00	18:02:00		25.064	22.7858	25.2343	37.9548	26.2703	27.0589	23.0437	27.1533	21.9998	25.118	18.8233	21.8699	6.22072	7.44401	5.31906	5.33932	6.45346	5.34956	10.1489	9.1875	10.4274	8.94346	12.938	8.67742
499	TG	06:00:00	18:01:00	18:02:00		17.5977	15.0871	13.6648	22.0439	15.147	21.2555	24.7388	25.1037	20.8762	23.1312	22.3187	21.8683	13.2601	16.0177	15.1031	14.6205	16.3578	12.1416	23.211	24.8872	22.5307	19.9122	27.8262	20.3091
500	TG	09:00:00	17:01:00	17:01:00		121.799	127.815	133.666	168.313	140.406	118.012	87.091	101.608	64.2963	68.8456	75.9074	93.1287	14.7333	18.8793	16.7299	23.3208	13.7182	19.7079	24.3584	16.7373	17.3476	15.7663	27.9825	12.1202
