# Supplementary material for: A lipid droplet-peroxisome network drives longevity by monounsaturated fatty acids via modulating ether lipid synthesis and ferroptosis
Source: Research Square preprint supplement (doi:10.21203/rs.3.rs-740521/v1), 2021-08-13
Supplement: Supplementary file 6 [file 312457f63113e34bb59615be.xlsx]

## Sheet: Sheet1
Extended Data Table 1 Lifespan table
Description	Associated Figure	Replicate									Experimenter
Cis/trans MUFA suppplementation (Oleic Acid, Elaidic Acid)	Fig. 1l	Replicate 1	Strain/Treatment	# Worms	# Censored	Median	P-value log-rank (Mantel-Cox) test			Not blinded/ Randomized	KP
			N2/Control	134	7	20
			N2/Oleic acid	128	11	27	p=<0.0001 vs N2/Control
			N2/Eleaidic acid	131	19	20	p=0.1595 vs N2/Control
	not shown	Replicate 2	Strain/Treatment	# Worms	# Censored	Median	P-value log-rank (Mantel-Cox) test			Not blinded/ Randomized	KP
			N2/Control	121	8	22
			N2/Oleic acid	120	15	24	p<0.0001 vs N2/Control
			N2/Eleaidic acid	130	18	19	p=0.0001 vs N2/Control
MUFA enrichment, lipid droplet perturbation (ash-2, lpin-1 RNAi)	Fig. 1p	Replicate 1	Strain/Treatment	# Worms	# Censored	Median	P-value log-rank (Mantel-Cox) test	Interaction hazard ratio (exponential coefficient)	P-value interaction (Cox proportional hazard) test	Blinded/Randomized	KP
			N2/Control	96	12	21		lpin-1 and ash-2 RNAi = 1.7164	p=0.0142
			N2/ash-2 RNAi	97	9	28	p<0.0001 vs N2/Control
			N2/lpin-1 RNAi	102	4	18
			N2/ash-2, lpin-1 RNAi	103	7	21	p<0.0001 vs N2/ash-2 RNAi
	not shown	Replicate 2	Strain/Treatment	# Worms	# Censored	Median	P-value log-rank (Mantel-Cox) test	Interaction hazard ratio (exponential coefficient)	P-value interaction (Cox proportional hazard) test	Not blinded/ Randomized	LMM
			N2/Control	108	19	19		lpin-1 and ash-2 RNAi = 1.4451	p=0.0934
			N2/ash-2 RNAi	108	21	24	p<0.0001 vs N2/Control
			N2/lpin-1 RNAi	109	16	17
			N2/ash-2, lpin-1 RNAi	110	17	19	p<0.0001 vs N2/ash-2 RNAi
MUFA enrichment, lipid droplet perturbation (Oleic acid, lpin-1 RNAi)	Fig. 1q	Replicate 1	Strain/Treatment	# Worms	# Censored	Median	P-value log-rank (Mantel-Cox) test	Interaction hazard ratio (exponential coefficient)	P-value interaction (Cox proportional hazard) test	Blinded/ Randomized	KP
			N2/Control	121	8	22		lpin-1 RNAi and Oleic acid = 2.8252	p=2.53e-07
			N2/Control + Oleic acid	105	22	26	p<0.0001 vs N2/Control
			N2/lpin-1 RNAi	125	2	19
			N2/lpin-1 RNAi + Oleic acid	122	6	19	p= 0.6256 vs N2/lpin-1 RNAi
		Replicate 2	Strain/Treatment	# Worms	# Censored	Median	P-value log-rank (Mantel-Cox) test	Interaction hazard ratio (exponential coefficient)	P-value interaction (Cox proportional hazard) test	Blinded/ Randomized	KP
			N2/Control	155	20	24		lpin-1 RNAi and Oleic acid = 1.9836	p=8.08e-05
			N2/Control + Oleic acid	152	26	26	p<0.0001 vs N2/Control
			N2/lpin-1 RNAi	151	14	19
			N2/lpin-1 RNAi + Oleic acid	148	4	19	p=0.0518 vs N2/lpin-1 RNAi
MUFA enrichment, lipid droplet perturbation (ash-2 RNAi, seip-1(gk5008))	Fig. 1r	Replicate 1	Strain/Treatment	# Worms	# Censored	Median	P-value log-rank (Mantel-Cox) test	Interaction hazard ratio (exponential coefficient)	P-value interaction (Cox proportional hazard) test	Blinded/ Randomized	KP
			N2/Control	90	7	21		seip-1(gk5008) and ash-2 RNAi = 4.4379	p=5.36e-10
			N2/ash-2 RNAi	64	9	28	p<0.0001 vs N2/Control
			seip-1(gk5008) /Control	97	4	21
			seip-1(gk5008)/ash-2 RNAi	100	1	24	p=0.1875 vs seip-1(gk5008)/Control
	not shown	Replicate 2	Strain/Treatment	# Worms	# Censored	Median	P-value log-rank (Mantel-Cox) test	Interaction hazard ratio (exponential coefficient)	P-value interaction (Cox proportional hazard) test	Blinded/ Randomized	KP
			N2/Control	99	24	21		seip-1(gk5008) and ash-2 RNAi = 3.0606	p=9.86e-07
			N2/ash-2 RNAi	103	26	26	p<0.0001 vs N2/Control
			seip-1(gk5008)/Control	101	20	21
			seip-1(gk5008)/ash-2 RNAi	101	5	23	p=0.0321 seip-1(gk5008)/Control
	not shown	Replicate 3	Strain/Treatment	# Worms	# Censored	Median	P-value log-rank (Mantel-Cox) test	Interaction hazard ratio (exponential coefficient)	P-value interaction (Cox proportional hazard) test	Blinded/ Randomized	AH
			N2/Control	105	20	20		seip-1(gk5008) and ash-2 RNAi = 2.3088	p=0.000257
			N2/ash-2 RNAi	105	26	25	p<0.0001 vs N2/Control
			seip-1(gk5008)/Control	105	12	20
			seip-1(gk5008)/ash-2 RNAi	105	19	22	p=0.0001 seip-1(gk5008)/Control
MUFA enrichment, lipid droplet perturbation (fat-2 RNAi, seip-1(gk5008))	Fig. 1s	Replicate 1	Strain/Treatment	# Worms	# Censored	Median	P-value log-rank (Mantel-Cox) test	Interaction hazard ratio (exponential coefficient)	P-value interaction (Cox proportional hazard) test	Blinded/ Randomized	KP
			N2/Control	100	26	22		seip-1(gk5008) and fat-2 RNAi= 5.9346	p=9.07e-12
			N2/fat-2 RNAi	96	43	29	p<0.0001 vs N2/Control
			seip-1(gk5008)/Control	90	13	24
			seip-1(gk5008)/fat-2 RNAi	103	4	24	p=0.1013 vs seip-1(gk5008)/Control
		Replicate 2	Strain/Treatment	# Worms	# Censored	Median	P-value log-rank (Mantel-Cox) test	Interaction hazard ratio (exponential coefficient)	P-value interaction (Cox proportional hazard) test	Blinded/ Randomized	KP
			N2/Control	95	11	22		seip-1(gk5008) and fat-2 RNAi = 2.0333	p=0.002752
			N2/fat-2 RNAi	79	25	24	p=0.0003 vs N2/Control
			seip-1(gk5008)/Control	98	4	22
			seip-1(gk5008)/fat-2 RNAi	96	6	22	p=0.8516 vs seip-1(gk5008)/Control
MUFA enrichment (ash-2, fat-2 RNAi)	Extended Data Fig. 1a	Replicate 1	Strain/Treatment	# Worms	# Censored	Median	P-value log-rank (Mantel-Cox) test			Blinded/ Randomized	KP
			N2/Control	97	26	23
			N2/ash-2 RNAi	96	30	30	p<0.0001 vs N2/Control
			N2/fat-2 RNAi	92	28	28	p<0.0001 vs N2/Control
	not shown	Replicate 2	Strain/Treatment	# Worms	# Censored	Median	P-value log-rank (Mantel-Cox) test			Blinded/ Randomized	KP
			N2/Control	71	10	20
			N2/ash-2 RNAi	97	30	27	p<0.0001 vs N2/Control
			N2/fat-2 RNAi	109	67	29	p<0.0001 vs N2/Control
MUFA enrichment (Oleic acid supplementation)	Extended Data Fig. 1b	Replicate 1	Strain/Treatment	# Worms	# Censored	Median	P-value log-rank (Mantel-Cox) test			Blinded/ Randomized	KP
			N2/Control	135	24	22
			N2/Control + Oleic Acid	140	44	25	p<0.0001 vs N2/Control
	not shown	Replicate 2	Strain/Treatment	# Worms	# Censored	Median	P-value log-rank (Mantel-Cox) test			Blinded/ Randomized	KP
			N2/Control	155	20	24
			N2/Control + Oleic Acid	152	26	26	p<0.0001 vs N2/Control
	not shown	Replicate 3	Strain/Treatment	# Worms	# Censored	Median	P-value log-rank (Mantel-Cox) test			Blinded/ Randomized	KP
			N2/Control	128	26	23
			N2/Control + Oleic Acid	142	54	25	p=0.0005 vs N2/Control
Inhibition lipid droplet degradation (hosl-1 RNAi)	Fig. 2b	Replicate 1	Strain/Treatment	# Worms	# Censored	Median	P-value log-rank (Mantel-Cox) test			Blinded/ Randomized	KP
			N2/Control	94	26	19
			N2/hosl-1 RNAi	101	15	22	p<0.0001 vs N2/Control
			These conditions are also listed in Fig. 3n (replicate 2)
	not shown	Replicate 2	Strain/Treatment	# Worms	# Censored	Median	P-value log-rank (Mantel-Cox) test			Blinded/ Randomized	KP
			N2/Control	94	22	20
			N2/hosl-1 RNAi	102	18	22	p=0.0023 vs N2/Control
	not shown	Replicate 3	Strain/Treatment	# Worms	# Censored	Median	P-value log-rank (Mantel-Cox) test			Blinded/ Randomized	KP
			N2/Control	95	11	22
			N2/hosl-1 RNAi	94	19	26	p<0.0001 vs N2/Control
			These conditions are also listed in Fig. 3n (replicate 1)
Sorted by lipid droplet number young adult (Biosorter, dult day 1)	Fig. 2f	Replicate 1	Strain/Treatment	# Worms	# Censored	Median	P-value log-rank (Mantel-Cox) test			Blinded/ Randomized	KP
			LIU1/Sorted low fluorescence	117	35	26
			LIU1/Sorted high fluorescence	116	28	28	p=0.0486 vs LIU1/Sorted low fluorescence
	not shown	Replicate 2	Strain/Treatment	# Worms	# Censored	Median	P-value log-rank (Mantel-Cox) test			Blinded/ Randomized	KP
			LIU1/Sortedlow fluorescence	131	29	21
			LIU1/Sorted high fluorescence	253	81	21	p=0.0072 vs LIU1/Sorted low fluorescence
Sorted by lipid droplet number middle age (manually, adult day 6)	Fig. 2h	Replicate 1	Strain/Treatment	# Worms	# Censored	Median	P-value log-rank (Mantel-Cox) test			Blinded/ Randomized	KP
			LIU1/Sorted low fluorescence	195	37	21
			LIU1/Sorted high fluorescence	210	26	28	p<0.0001 vs LIU1/sorted low fluorescence
	not shown	Replicate 2	Strain/Treatment	# Worms	# Censored	Median	P-value log-rank (Mantel-Cox) test			Blinded/ Randomized	KP
			LIU1/Sorted low fluorescence	180	6	19
			LIU1/Sorted high fluorescence	117	17	23	p<0.0001 vs LIU1/sorted low fluorescence
	not shown	Replicate 3	Strain/Treatment	# Worms	# Censored	Median	P-value log-rank (Mantel-Cox) test			Blinded/ Randomized	AH
			LIU1/Sorted low fluorescence	214	12	21
			LIU1/Sorted high fluorescence	211	15	23	p<0.0001 vs LIU1/sorted low fluorescence
Inhibition lipid droplet degradation (atgl-1 RNAi)	Extended Data Fig. 2b	Replicate 1	Strain/Treatment	# Worms	# Censored	Median	P-value log-rank (Mantel-Cox) test			Blinded/ Randomized	LMM
			N2/Control	108	21	18
			N2/atgl-1 RNAi	111	31	20	p<0.0001 vs N2/Control
MUFA enrichment, peroxisome perturbation (ash-2, prx-5 RNAi)	Fig. 3e	Replicate 1	Strain/Treatment	# Worms	# Censored	Median	P-value log-rank (Mantel-Cox) test	Interaction hazard ratio (exponential coefficient)	P-value interaction (Cox proportional hazard) test	Blinded/ Randomized	KP
			N2/Control	94	22	20		prx-5 and ash-2 RNAi = 2.9712	p=4.02e-06
			N2/ash-2 RNAi	95	22	25	p<0.0001 vs N2/Control
			N2/prx-5 RNAi	95	10	20
			N2/ prx-5, ash-2 RNAi	94	13	20	p=0.2550 vs N2/prx-5 RNAi
	not shown	Replicate 2	Strain/Treatment	# Worms	# Censored	Median	P-value log-rank (Mantel-Cox) test	Interaction hazard ratio (exponential coefficient)	P-value interaction (Cox proportional hazard) test	Blinded/ Randomized	KP
			N2/Control	71	10	20		prx-5 and ash-2 RNAi = 4.8386	p=1.89e-10
			N2/ash-2 RNAi	97	30	27	p<0.0001 vs N2/Control
			N2/prx-5 RNAi	102	16	22
			N2/ prx-5, ash-2 RNAi	102	20	22	p=0.4825 vs N2/prx-5 RNAi
MUFA enrichment, ether lipid disruption (ash-2, ads-1 RNAi)	Fig. 3m	Replicate 1	Strain/Treatment	# Worms	# Censored	Median	P-value log-rank (Mantel-Cox) test	Interaction hazard ratio (exponential coefficient)	P-value interaction (Cox proportional hazard) test	Blinded/ Randomized	KP
			N2/Control	94	26	19		ads-1 and ash-2 RNAi = 3.7150	p =1.28e-07
			N2/ash-2 RNAi	101	18	27	p<0.0001 vs N2/Control
			N2/ads-1 RNAi	102	17	19
			N2/ads-1, ash-2 RNAi	81	14	19	p=0.109 vs N2/ads-1 RNAi
			Some conditions are also listed in Extended Data Fig. 3k and Extended Data Fig. 3l
	not shown	Replicate 2	Strain/Treatment	# Worms	# Censored	Median	P-value log-rank (Mantel-Cox) test	Interaction hazard ratio (exponential coefficient)	P-value interaction (Cox proportional hazard) test	Blinded/ Randomized	KP
			N2/Control	95	13	21		ads-1 and ash-2 RNAi = 2.8315	p =3.44e-05
			N2/ash-2 RNAi	94	17	31	p<0.0001 vs N2/Control
			N2/ads-1 RNAi	94	7	19
			N2/ads-1, ash-2 RNAi	93	12	24	p<0.0001 vs N2/ads-1 RNAi
			Some conditions are also listed in Extended Data Fig. 3k and Extended Data Fig. 3o
Lipid droplet enrichment, ether lipid disruption (hosl-1, ads-1 RNAi)	Fig. 3n	Replicate 1	Strain/Treatment	# Worms	# Censored	Median	P-value log-rank (Mantel-Cox) test	Interaction hazard ratio (exponential coefficient)	P-value interaction (Cox proportional hazard) test	Blinded/ Randomized	KP
			N2/Control	95	11	22		ads-1 and hosl-1 RNAi = 3.0656	p=1.23e-06
			N2/hosl-1 RNAi	94	19	26	p<0.0001 vs N2/Control
			N2/ads-1 RNAi	100	14	22
			N2/hosl-1, ads-1 RNAi	96	5	22	p=0.6177 vs N2/ads-1 RNAi
			Some conditions are also listed in Fig. 2b (replicate 3)
	not shown	Replicate 2	Strain/Treatment	# Worms	# Censored	Median	P-value log-rank (Mantel-Cox) test	Interaction hazard ratio (exponential coefficient)	P-value interaction (Cox proportional hazard) test	Blinded/ Randomized	KP
			N2/Control	94	26	19		ads-1 and hosl-1 RNAi = 1.9730	p=0.00334
			N2/hosl-1 RNAi	101	15	22	p<0.0001 vs N2/Control
			N2/ads-1 RNAi	102	17	19
			N2/hosl-1, ads-1 RNAi	97	18	19	p=0.0467 vs N2/ads-1 RNAi
			Some conditions are also listed in Fig. 2b (replicate 1)
MUFA enrichment, peroxisome perturbation (Oleic acid, prx-5 RNAi)	Extended Data Fig. 3f	Replicate 1	Strain/Treatment	# Worms	# Censored	Median	P-value log-rank (Mantel-Cox) test	Interaction hazard ratio (exponential coefficient)	P-value interaction (Cox proportional hazard) test	Blinded/ Randomized	KP
			N2/Control	121	8	22		prx-5 RNAi and Oleic acid = 2.3541	p=8.26e-06
			N2/Control + Oleic Acid	120	15	24	p<0.0001 vs N2/Control
			N2/prx-5 RNAi	121	11	22
			N2/prx-5 RNAi + Oleic Acid	125	8	22	p=0.5817 vs N2/prx-5 RNAi
	not shown	Replicate 2	Strain/Treatment	# Worms	# Censored	Median	P-value log-rank (Mantel-Cox) test	Interaction hazard ratio (exponential coefficient)	P-value interaction (Cox proportional hazard) test	Blinded/ Randomized	KP
			N2/Control	128	26	23		prx-5 RNAi and Oleic acid = 1.2262	p=0.302502
			N2/Control + Oleic Acid	142	54	25	p=0.0005 vs N2/Control
			N2/prx-5 RNAi	140	26	21
			N2/prx-5 RNAi + Oleic Acid	138	29	23	p=0.0542 vs N2/prx-5 RNAi
MUFA enrichment, peroxisome perturbation (ash-2, prx-19 RNAi)	Extended Data Fig. 3g	Replicate 1	Strain/Treatment	# Worms	# Censored	Median	P-value log-rank (Mantel-Cox) test	Interaction hazard ratio (exponential coefficient)	P-value interaction (Cox proportional hazard) test	Blinded/ Randomized	KP
			N2/Control	97	15	22		prx-19 and ash-2 RNAi = 3.2764	p=2.76e-07
			N2/ash-2 RNAi	97	35	29	p<0.0001 vs N2/Control
			N2/prx-19 RNAi	96	8	22
			N2/ prx-19, ash-2 RNAi	95	12	22	p=0.8550 vs N2/prx-19 RNAi
MUFA enrichment, ether lipid disruption (ash-2, fard-1 RNAi)	Extended Data Fig. 3k	Replicate 1	Strain/Treatment	# Worms	# Censored	Median	P-value log-rank (Mantel-Cox) test	Interaction hazard ratio (exponential coefficient)	P-value interaction (Cox proportional hazard) test	Blinded/ Randomized	KP
			N2/Control	94	26	19		fard-1 and ash-2 RNAi = 3.1731	p (fard-1 and ash-2 RNAi)=1.35e-06
			N2/ash-2 RNAi	101	18	27	p<0.0001 vs N2/Control
			N2/fard-1 RNAi	102	9	19
			N2/fard-1, ash-2 RNAi	92	16	19	p=0.0101 vs N2/fard-2 RNAi, p<0.0001 vs N2/ash-2 RNAi
			Some conditions are also listed in Fig 3m and Extended Data Fig. 3l
	not shown	Replicate 2	Strain/Treatment	# Worms	# Censored	Median	P-value log-rank (Mantel-Cox) test	Interaction hazard ratio (exponential coefficient)	P-value interaction (Cox proportional hazard) test	Blinded/ Randomized	KP
			N2/Control	95	13	21		fard-1 and ash-2 RNAi = 2.0494	p (fard-1 and ash-2 RNAi) =0.0045
			N2/ash-2 RNAi	94	17	31	p<0.0001 vs N2/Control
			N2/fard-1 RNAi	94	22	21
			N2/fard-1, ash-2 RNAi	91	20	26	p<0.0001 vs N2/ash-2 RNAi
			Some conditions are also listed in Fig 3m and Extended Data Fig. 3o
MUFA enrichment, ether lipid disruption (fat-2, fard-1 RNAi)	Extended Data Fig. 3l	Replicate 1	Strain/Treatment	# Worms	# Censored	Median	P-value log-rank (Mantel-Cox) test	Interaction hazard ratio (exponential coefficient)	P-value interaction (Cox proportional hazard) test	Blinded/ Randomized	KP
			N2/Control	94	26	19		ads-1 and fat-2 RNAi = 1.4638	p (ads-1 and fat-2 RNAi) = 0.09729
			N2/fat-2 RNAi	105	17	25	p<0.0001 vs N2/Control
			N2/ads-1 RNAi	102	17	19
			N2/ads-1, fat-2 RNAi	96	21	22	p<0.0001 vs N2/fat-2 RNAi
			Some conditions are also listed in Fig 3m and Extended Data Fig. 3k
	not shown	Replicate 2	Strain/Treatment	# Worms	# Censored	Median	P-value log-rank (Mantel-Cox) test	Interaction hazard ratio (exponential coefficient)	P-value interaction (Cox proportional hazard) test	Blinded/ Randomized	AH
			N2/Control	101	21	20		ads-1 and fat-2 RNAi = 1.3447	p (ads-1 and fat-2 RNAi) = 0.20408
			N2/fat-2 RNAi	96	41	23	p<0.0001 vs N2/Control
			N2/ads-1 RNAi	105	22	19
			N2/fat-2, ads-1 RNAi	109	22	20	p=0.0032 vs N2/ads-1 RNAi
			Some conditions are also listed in Extended Data Fig. 3l and Extended Data Fig. 3o
Lipid droplet sorting, ether-lipid disruption (manually, ads-1 RNAi)	Extended Data Fig. 3m	Replicate 1	Strain/Treatment	# Worms	# Censored	Median	P-value log-rank (Mantel-Cox) test	Interaction hazard ratio (exponential coefficient)	P-value interaction (Cox proportional hazard) test	Blinded/ Randomized	KP
			LIU1/Low lipid droplet number/Control	77	29	18		Lipid droplet number and ads-1 RNAi = 1.8176	p=0.027830
			LIU1/High lipid droplet number/Control	92	23	22	p=0.0004 vs LIU1/Low lipid droplet number/Control
			LIU1/Low lipid droplet number/ads-1 RNAi	81	30	18
			LIU1/High lipid droplet number/ads-1 RNAi	89	26	20	p=0.3558 vs LIU1/Low lipid droplet number/ads-1 RNAi
MUFA enrichment, peroxisome beta-oxidation (ash-2, daf-22 RNAi)	Extended Data Fig. 3n	Replicate 1	Strain/Treatment	# Worms	# Censored	Median	P-value log-rank (Mantel-Cox) test	Interaction hazard ratio (exponential coefficient)	P-value interaction (Cox proportional hazard) test	Blinded/ Randomized	KP
			N2/Control	66	11	25		ash-2 and daf-22 RNAi = 0.4498	p=0.002560
			N2/ash-2 RNAi	80	27	30	p<0.0001 VS N2/Control
			N2/daf-22 RNAi	101	22	22
			N2/daf-22, ash-2 RNAi	97	47	30	p<0.0001 VS N2/daf-22 RNAi
	not shown	Replicate 2	Strain/Treatment	# Worms	# Censored	Median	P-value log-rank (Mantel-Cox) test	Interaction hazard ratio (exponential coefficient)	P-value interaction (Cox proportional hazard) test	Blinded/ Randomized	AH
			N2/Control	101	21	20		daf-22 and ash-2 RNAi = 1.5763	p ( daf-22 and ash-2 RNAi) = 0.0623
			N2/ash-2 RNAi	94	24	28	p<0.0001 vs N2/Control
			N2/daf-22 RNAi	100	24	19
			N2/daf-22, ash-2 RNAi	101	42	28	p<0.0001 vs N2/daf-22 RNAi
			Some conditions are also listed in Extended Data Fig. 3n, Extended Data Fig. 3o
MUFA enrichment, ROS disruption (ash-2, ctl-3 RNAI)	Extended Data Fig. 3o	Replicate 1	Strain/Treatment	# Worms	# Censored	Median	P-value log-rank (Mantel-Cox) test	Interaction hazard ratio (exponential coefficient)	P-value interaction (Cox proportional hazard) test	Blinded/ Randomized	KP
			N2/Control	95	13	21		ctl-3 and ash-2 RNAi = 1.8374	p (ctl-3 and ash-2) = 0.009083
			N2/ash-2 RNAi	94	17	31	p<0.0001 vs N2/Control
			N2/ctl-3 RNAi	83	7	24	p=0.0012 vs N2/Control
			N2/ctl-3, ash-2 RNAi	96	28	31	p=0.8988 vs N2/ash-2 RNAi
			Some conditions are also listed in Fig 3m and Extended Data Fig. 3k
	not shown	Replicate 2	Strain/Treatment	# Worms	# Censored	Median	P-value log-rank (Mantel-Cox) test	Interaction hazard ratio (exponential coefficient)	P-value interaction (Cox proportional hazard) test	Blinded/ Randomized	AH
			N2/Control	101	21	20		ctl-3 and ash-2 RNAi = 1.6720	p (ctl-3 and ash-2 RNAi) = 0.0281
			N2/ash-2 RNAi	94	24	28	p<0.0001 vs N2/Control
			N2/ctl-3 RNAi	99	24	20
			N2/ctl-3, ash-2 RNAi	99	27	28	p<0.0001 vs N2/ctl-3 RNAi
			Some conditions are also listed in Extended Data Fig. 3l and Extended Data Fig. 3n
MUFA enrichment, Ferroptosis induction (ash-2 RNAi, gpx-1(tm2100))	Fig. 4g	Replicate 1	Strain/Treatment	# Worms	# Censored	Median	P-value log-rank (Mantel-Cox) test	Interaction hazard ratio (exponential coefficient)	P-value interaction (Cox proportional hazard) test	Blinded/ Randomized	KP
			N2/Control	94	20	22		gpx-1(tm2100) and ash-2 RNAi = 4.6323	p=3.4e-09
			N2/ash-2 RNAi	99	18	29	p<0.0001 vs N2/Control
			gpx-1(tm2100)/Control	82	20	22
			gpx-1(tm2100)/ash-2 RNAi	90	26	22	p=0.3662 vs gpx-1(tm2100)/Control
		Replicate 2	Strain/Treatment	# Worms	# Censored	Median	P-value log-rank (Mantel-Cox) test	Interaction hazard ratio (exponential coefficient)	P-value interaction (Cox proportional hazard) test	Blinded/ Randomized	AH
			N2/Control	98	17	19		gpx-1(tm2100) and ash-2 RNAi = 3.51657	p=1.12e-07
			N2/ash-2 RNAi	100	21	28	p<0.0001 vs N2/Control
			gpx-1(tm2100)/Control	100	24	19
			gpx-1(tm2100)/ash-2 RNAi	102	18	19	p=0.6254 vs gpx-1(tm2100)/Control
MUFA enrichment, Ferroptosis inhibition (ash-2 RNAi, Salinazid)	Fig. 4i	Replicate 1	Strain/Treatment	# Worms	# Censored	Median	P-value log-rank (Mantel-Cox) test	Interaction hazard ratio (exponential coefficient)	P-value interaction (Cox proportional hazard) test	Blinded/ Randomized	AH
			N2/DMSO/Control	111	17	18		ash-2 RNAi and Salinazid = 2.7013	p (ash-2 RNAi and Salinazid) = 2.10e-06
			N2/Salinazid/Control	111	17	20	p<0.0001vs N2/DMSO/Control
			N2/DMSO/ash-2 RNAi	110	13	22	p<0.0001 vs N2/DMSO/Control
			N2/Salinazid/ash-2 RNAi	111	19	25	p=0.7992 vs N2/DMSO/ash-2 RNAi
			Some conditions are also listed in Fig 4j, Fig 4k and Extended Data Fig. 4f
Ferroptosis inhibition, lipid droplet disruption (Salinazid, lpin-1 RNAi)	Fig. 4j	Replicate 1	Strain/Treatment	# Worms	# Censored	Median	P-value log-rank (Mantel-Cox) test	Interaction hazard ratio (exponential coefficient)	P-value interaction (Cox proportional hazard) test	Blinded/ Randomized	AH
			N2/DMSO/Control	105	5	19		lpin-1 RNAi and Salinazid = 2.4031	p (lpin-1 RNAi and Salinazid)=1.79e-05
			N2/Salinazid/Control	110	8	21	p<0.0001vs N2/DMSO/Control
			N2/DMSO/lpin-1 RNAi	110	7	16
			N2/Salinazid/lpin-1 RNAi	105	12	16	p=0.9876 vs N2/DMSO/lpin-1 RNAi
			Some conditions are also listed in Extended Data Fig. 4k
	not shown	Replicate 2	Strain/Treatment	# Worms	# Censored	Median	P-value log-rank (Mantel-Cox) test	Interaction hazard ratio (exponential coefficient)	P-value interaction (Cox proportional hazard) test	Blinded/ Randomized	AH
			N2/DMSO/Control	111	17	18		lpin-1 RNAi and Salinazid = 2.1734	p (lpin-1 RNAi and Salinazid) = 0.000211
			N2/Salinazid/Control	111	17	20	p<0.0001vs N2/DMSO/Control
			N2/DMSO/lpin-1 RNAi	111	14	15
			N2/Salinazid/lpin-1 RNAi	111	16	15	p=0.6081 vs N2/DMSO/lpin-1 RNAi
			Some conditions are also listed in Fig 4i, Fig 4k and Extended Data Fig. 4f
Ferroptosis inhibition, ether lipid disruption (Salinazid, ads-1 RNAi)	Fig. 4k	Replicate 1	Strain/Treatment	# Worms	# Censored	Median	P-value log-rank (Mantel-Cox) test	Interaction hazard ratio (exponential coefficient)	P-value interaction (Cox proportional hazard) test	Blinded/ Randomized	AH
			N2/DMSO/Control	105	5	19		ads-1 RNAi and Salinazid = 2.2992	p (ads-1 RNAi and Salinazid)=4.41e-05
			N2/Salinazid/Control	110	8	21	p<0.0001vs N2/DMSO/Control
			N2/DMSO/ads-1 RNAi	108	5	16
			N2/Salinazid/ads-1 RNAi	105	9	16	p=0.9011 vs N2/DMSO/ads-1 RNAi
			Some conditions are also listed in Extended Data Fig. 4j
		Replicate 2	Strain/Treatment	# Worms	# Censored	Median	P-value log-rank (Mantel-Cox) test	Interaction hazard ratio (exponential coefficient)	P-value interaction (Cox proportional hazard) test	Blinded/ Randomized	AH
			N2/DMSO/Control	111	17	18		ads-1 RNAi and Salinazid = 2.1271	p (ads-1 RNAi and Salinazid) = 0.000308
			N2/Salinazid/Control	111	17	20	p<0.0001vs N2/DMSO/Control
			N2/DMSO/ads-1 RNAi	111	18	15
			N2/Salinazid/ads-1 RNAi	111	13	18	p=0.5867 vs N2/DMSO/ads-1 RNAi
			Some conditions are also listed in Fig. 4i, Fig. 4j and Extended Data Fig. 4f
MUFA enrichment, Ferroptosis inhibition (fat-2 RNAi, Salinazid)	Extended Data Fig. 4f	Replicate 2	Strain/Treatment	# Worms	# Censored	Median	P-value log-rank (Mantel-Cox) test	Interaction hazard ratio (exponential coefficient)	P-value interaction (Cox proportional hazard) test	Blinded/ Randomized	AH
			N2/DMSO/Control	111	17	18		fat-2 RNAi and Salinazid = 2.5843	p (fat-2 RNAi and Salinazid) = 2.53e-05
			N2/Salinazid/Control	111	17	20	p<0.0001vs N2/DMSO/Control
			N2/DMSO/fat-2 RNAi	111	48	20	p<0.0001 vs N2/DMSO/Control
			N2/Salinazid/fat-2 RNAi	111	32	20	p=0.6746 vs N2/DMSO/fat-2 RNAi
			Some conditions are also listed in Fig. 4i, Fig. 4j and Fig. 4k
