# Supplementary material for: A lipid droplet-peroxisome network drives longevity by monounsaturated fatty acids via modulating ether lipid synthesis and ferroptosis
Source: Research Square preprint supplement (doi:10.21203/rs.3.rs-740521/v1), 2021-08-13
Supplement: Supplementary file 8 [file 01670953e8eddbd3eba51f8a.xlsx]

## Sheet: Sheet1
Extended Data Table 2
Associated Figure	Fig. 3b
GO term/Coexpression predicted GO term	Combined score Greer 2010	Combined score Han 2017	Annotation
peroxisomal part (GO:0044439)	23.1828	6.45145	Peroxisome
response to cadmium ion (GO:0046686)	6.35688	13.1269	Response to Ions
stress response to cadmium ion (GO:1990170)	17.7133	10.6118	Response to Ions
transition metal ion homeostasis (GO:0055076)	5.70178	7.00416	Response to Ions
copper ion binding (GO:0005507)	8.72076	17.6424	Response to Ions
heme binding (GO:0020037)	18.7764	8.92327	Response to Ions
metal ion transmembrane transporter activity (GO:0046873)	17.9079	10.3005	Response to Ions
cellular response to superoxide (GO:0071451)	5.44487	5.75936	Response to ROS
removal of superoxide radicals (GO:0019430)	5.37071	5.66649	Response to ROS
negative regulation of endopeptidase activity (GO:0010951)	18.7492	12.7477	Amino acid metabolism
negative regulation of peptidase activity (GO:0010466)	16.7436	8.80542	Amino acid metabolism
regulation of endopeptidase activity (GO:0052548)	20.9262	12.248	Amino acid metabolism
serine-type endopeptidase inhibitor activity (GO:0004867)	15.0092	6.3008	Amino acid metabolism
glutamate metabolic process (GO:0006536)	7.9007	11.3118	Amino acid metabolism
hexose metabolic process (GO:0019318)	9.65505	8.72231	Metabolism
phosphate-containing compound metabolic process (GO:0006796)	9.11103	5.10343	Metabolism
transferase activity, transferring hexosyl groups (GO:0016758)	9.7638	5.07101	Metabolism
dicarboxylic acid biosynthetic process (GO:0043650)	6.05971	12.4863	Enzymatic activity
carboxylic ester hydrolase activity (GO:0052689)	6.62175	10.9199	Enzymatic activity
cysteine-type peptidase activity (GO:0008234)	5.86466	8.09896	Enzymatic activity
ether hydrolase activity (GO:0016803)	12.594	5.1671	Enzymatic activity
glucuronosyltransferase activity (GO:0015020)	5.74388	5.5902	Enzymatic activity
oxidoreductase activity, acting on paired donors, with incorporation or reduction of molecular oxygen, reduced flavin or flavoprotein as one donor, and incorporation of one atom of oxygen (GO:0016712)	12.1318	15.6067	Enzymatic activity
UDP-glycosyltransferase activity (GO:0008194)	16.6939	8.37165	Enzymatic activity
steroid hydroxylase activity (GO:0008395)	12.1095	15.5795	Lipid metabolism
defense response to bacterium (GO:0042742)	6.22453	8.67356	Bacerial defense
drug catabolic process (GO:0042737)	14.3335	9.32008	Drug
exogenous drug catabolic process (GO:0042738)	13.2285	8.59524	Drug
