# Supplementary material for: A lipid droplet-peroxisome network drives longevity by monounsaturated fatty acids via modulating ether lipid synthesis and ferroptosis
Source: Research Square preprint supplement (doi:10.21203/rs.3.rs-740521/v1), 2021-08-13
Supplement: Supplementary file 9 [file 2c2e995e0b5574bb3e73c031.xlsx]

## Sheet: Sheet1
Extended Data Table 3 PC loadings
Associated Fig. 4c
	PC1	PC2
Cer-d17:0-22:0--	0.052605	-0.00285154
Cer-d17:0-23:0--	0.0508063	0.0147832
Cer-d17:1-20:0--	0.0517039	-0.02725
Cer-d17:1-20:1--	0.0504138	0.0228271
Cer-d17:1-21:0--	0.0545131	-0.0200551
Cer-d17:1-21:0+O--	0.0542393	-0.00027474
Cer-d17:1-21:1--	0.0543593	-0.000828521
Cer-d17:1-22:0--	0.049458	-0.00275183
Cer-d17:1-22:0+O--	0.0528145	0.0301923
Cer-d17:1-22:1--	0.0204517	0.0183253
Cer-d17:1-23:0--	0.0544211	0.000560066
Cer-d17:1-23:0+O--	0.0547734	0.0100811
Cer-d17:1-23:1--	0.0548236	0.0101928
Cer-d17:1-24:0--	0.0517764	-0.000833139
Cer-d17:1-24:0+O--	0.0507054	0.0483497
Cer-d17:1-24:1--	0.0455633	0.0430295
Cer-d17:1-25:0+O--	0.0545309	0.0109065
Cer-d17:1-25:1--	0.0510036	0.0114866
Cer-d17:1-26:0+O--	0.0526899	0.0142675
Cer-d17:1-26:1--	0.0450703	-0.00514938
Cer-t17:0-21:0+O--	0.0549534	0.00868862
Cer-t17:0-22:0+O--	0.0538091	0.00463482
Cer-t17:0-24:0+O--	0.0542599	0.0166945
Cer-t17:0-25:0+O--	0.0541217	0.00958991
CL-15:0-20:4-20:4-20:3	-0.00567503	0.0459911
CL-17:1-20:4-20:4-20:4	0.0269721	0.0756905
CL-18:2-18:0-18:0-22:0	0.0436036	0.0851814
CL-18:2-20:3-18:2-20:3	-0.0345261	0.0936272
CL-18:3-18:1-20:4-18:2	-0.0277327	0.104587
CL-18:3-20:4-20:3-18:2	-0.00656121	0.137003
CL-18:3-20:4-20:4-18:2	0.00198725	0.139616
CL-20:3-20:3-18:1-20:4	0.0364796	0.0895302
CL-20:4-20:3-20:3-20:3	0.0475189	0.0641299
CL-20:4-20:3-20:3-20:4	0.0401493	0.0919444
CL-20:4-20:3-20:4-18:2	-0.00590296	0.132997
CL-20:4-20:3-20:4-20:4	0.0317272	0.115703
CL-20:4-20:4-20:4-20:4	0.0227509	0.13076
CL-20:5-15:1-18:0-24:1	-0.0176511	0.121627
CL-20:5-20:3-20:4-18:2	0.0214515	0.12538
CL-20:5-20:4-18:2-20:4	0.00121847	0.129657
CL-20:5-20:4-20:4-20:4	0.0191861	0.10244
CL-20:5-22:3-24:1-15:0	0.0149791	0.107328
CL-20:5-22:6-20:3-20:4	0.0376423	0.096408
CL-22:6-20:3-20:3-20:4	0.0464436	0.0688282
CL-22:6-20:4-20:3-20:4	0.0425551	0.0880177
CL-23:0-15:0-18:0-18:2	0.0488301	0.0510964
CL-24:0-18:1-20:0-20:3	0.0533712	0.03864
DG-14:0-18:2--	-0.030397	-0.0205189
DG-15:0-17:0--	0.0522353	-0.0128856
DG-15:0-18:2--	-0.0445597	0.00171086
DG-15:0-20:2--	0.033239	-0.00749736
DG-15:0-20:4--	0.0344832	-0.00155345
DG-15:0-20:5--	-0.028831	-0.0121895
DG-16:0-20:5--	-0.0479444	-0.0234585
DG-16:1-18:1--	-0.0400504	-0.0305846
DG-16:1-20:5--	-0.0467088	-0.0309919
DG-17:0-17:0--	0.0358647	-0.0128097
DG-17:1-17:0--	0.0203501	-0.0724159
DG-17:1-18:2--	-0.0474845	0.0359439
DG-17:1-20:3--	0.00952508	0.0246959
DG-17:1-20:4--	0.0506483	0.00784154
DG-17:1-20:5--	-0.0451766	0.00702749
DG-18:0-17:0--	0.0543343	-0.00483291
DG-18:0-18:1--	0.0539898	-0.0160808
DG-18:0-18:2--	0.0525356	-0.0146923
DG-18:0-20:2--	0.0504422	-0.0198417
DG-18:0-20:3--	0.0542158	-0.0202465
DG-18:0-20:4--	0.0527214	-0.033158
DG-18:0-20:5--	0.0538424	-0.0116657
DG-18:1-18:1--	-0.0543167	-0.0135131
DG-18:1-18:2--	-0.0524386	-0.00870493
DG-18:1-18:3--	-0.0385883	0.00697162
DG-18:1-20:3--	-0.0460689	-0.0376042
DG-18:1-20:4--	-0.0428008	-0.0106787
DG-18:1-20:5--	-0.0497505	-0.012711
DG-18:2-20:4--	0.0153039	0.0420271
DG-18:3-20:5--	-0.0277466	0.0545958
DG-19:1-18:0--	0.0541736	-0.00120067
DG-19:1-18:1--	0.0440395	-0.0168811
DG-19:1-19:1--	0.0543422	0.0122458
DG-19:1-20:2--	0.0471073	0.0197806
DG-19:1-20:3--	0.0510462	-0.00378192
DG-19:1-20:4--	0.0517307	-0.0101843
DG-19:1-20:5--	0.0257312	0.0184358
DG-20:0-20:4--	0.0521886	-0.0187386
DG-20:2-20:3--	0.0527686	0.0203267
DG-20:2-20:4--	0.0301132	-0.0720297
DG-20:2-20:5--	0.0461893	-0.056069
DG-20:3-20:3--	0.052234	-0.0313987
DG-20:5-18:2--	-0.0242822	0.0289301
DG-20:5-20:4--	0.0388341	-0.0538333
DG-20:5-20:5--	-0.0448387	-0.000957141
DG-20:5-21:0--	0.0550648	-0.00629255
DG-22:0-20:5--	0.0539767	-0.00123851
LPC-16:0---	-0.00249554	0.0380211
LPC-16:1---	-0.0457225	0.0186695
LPC-18:0---	0.0524901	0.000543163
LPC-18:1---	-0.0509414	0.0266824
LPC-18:2---	-0.0338836	0.0620844
LPC-18:3---	-0.0185851	0.0221235
LPC-19:1---	0.0339126	0.057737
LPC-20:4---	-0.0513399	0.0141764
LPC-20:5---	-0.031961	0.027655
LPE-16:0---	-0.0520502	0.020658
LPE-17:0---	0.0297876	-0.00312652
LPE-17:1---	-0.0359847	0.0748322
LPE-18:0e---	-0.0538214	0.00701712
LPE-18:1---	-0.0377414	0.0229696
LPE-18:2---	-0.0427717	0.0471462
LPE-18:3---	-0.0437982	0.0686496
LPE-19:0---	0.0533563	0.0108533
LPE-20:0---	0.0532838	0.00199276
LPE-20:3---	-0.0211085	0.0811572
LPE-20:4---	-0.0222192	0.0459032
LPE-20:5---	-0.0463431	0.0502018
LPE-21:0---	0.0542697	0.00552147
LPE-22:0---	0.0541883	0.00922192
LPE-27:0---	0.0491661	0.0265864
LPI-20:5---	-0.0333959	0.0729402
LPS-18:0---	0.0484865	-0.0156461
LPS-20:0---	0.0166505	-0.00640302
MG-16:0---	0.0506363	0.0186823
MG-18:2---	0.0498174	0.0206939
MG-18:3e---	0.0355112	-0.0563539
MLCL-14:2-16:0-16:0-	-0.022347	0.108086
MLCL-14:2-18:1-18:1-	-0.0423682	0.0457359
MLCL-18:2-20:3-20:4-	0.00231146	0.0979884
MLCL-6:0-18:0-20:4-	0.0475348	0.0486615
PC-14:0-20:5--	-0.054177	-0.00254137
PC-15:0-18:1--	-0.0483832	0.00971912
PC-15:0-18:2--	-0.0216663	0.0430596
PC-15:0-18:3--	-0.0478348	0.0348146
PC-15:0-20:4--	-0.00632096	0.0950174
PC-15:0-20:5--	-0.048224	0.0128886
PC-16:1-18:2--	-0.0271005	-0.0137156
PC-17:0-17:0--	0.0542598	0.00684463
PC-17:1-15:0--	0.0222815	-0.0191564
PC-17:1-16:0--	-0.0521793	0.0103904
PC-17:1-17:0--	0.0539759	0.011743
PC-17:1-17:1--	-0.0335092	0.0438654
PC-17:1-18:0--	0.0546073	0.00618168
PC-17:1-18:1--	-0.0373496	0.03872
PC-17:1-18:2--	-0.0210971	0.0649524
PC-17:1-19:1--	0.0528753	0.0211322
PC-17:1-20:5--	-0.0517151	0.0169232
PC-18:0-15:0--	0.0538751	0.000541985
PC-18:0-20:3--	0.0531219	-0.0206345
PC-18:0-20:4--	0.0546368	-0.0187333
PC-18:0-20:5--	0.054838	-0.0128746
PC-18:1-18:1--	-0.0547177	-0.000156771
PC-18:1-20:2--	-0.0540684	0.00609204
PC-18:3-20:5--	-0.0391371	-0.011312
PC-18:4-18:3--	-0.00552407	-0.0206677
PC-18:4-20:5--	-0.0502617	0.0389593
PC-19:1-18:0--	0.054577	0.00634755
PC-19:1-18:1--	-0.0066138	0.0276881
PC-19:1-18:2--	0.0466344	0.0549635
PC-19:1-19:1--	0.0539454	0.00778471
PC-19:1-20:0--	0.0547574	-0.00262685
PC-19:1-20:3--	0.0521423	0.0330537
PC-19:1-20:4--	0.0513276	0.0229694
PC-19:1-20:5--	0.0490943	0.0572522
PC-20:0-20:5--	0.0543179	-0.00729137
PC-20:2-20:3--	0.0266199	-0.0544548
PC-20:2-20:5--	0.0529539	-0.0106119
PC-20:3-20:3--	0.0548452	-0.00308793
PC-20:3-20:4--	0.0545849	0.000297496
PC-20:3-20:5--	0.0533271	-0.0144119
PC-20:5-18:2--	-0.000352557	0.0562127
PC-20:5-20:4--	0.0336064	0.0148149
PC-20:5-20:5--	0.00270781	-0.0307799
PC-20:5-21:0--	0.0526915	-0.0177857
PC-20:5-21:1--	0.0528907	0.0347303
PC-22:0-18:2--	0.0497243	0.00415949
PE-14:0-20:5--	-0.0547286	0.00820903
PE-15:0-15:0--	0.0496036	0.0387721
PE-15:0-16:0--	-0.0378271	0.0625122
PE-15:0-17:0--	0.0315038	-0.0060036
PE-15:0-18:2--	-0.0285564	0.0571608
PE-15:0-20:5--	-0.0445555	0.0597452
PE-16:0-14:0--	0.00116736	-0.0396127
PE-16:0-18:3--	-0.0422269	0.00715501
PE-16:0-20:3--	-0.0382562	-0.039271
PE-16:0-20:5--	-0.054144	0.00992501
PE-16:1-14:0--	-0.0434856	-0.0201181
PE-16:1-17:0--	-0.0337092	0.0194903
PE-17:0-17:0--	0.04385	0.0220917
PE-17:0-18:2--	0.0324805	0.0421355
PE-17:0-20:1--	0.0386787	0.0126874
PE-17:0-20:4--	0.0545513	0.00564822
PE-17:0-20:5--	0.0259677	-0.0133051
PE-17:0-21:0--	0.0550887	-0.00124245
PE-17:0-23:0--	0.0548823	-0.00304607
PE-17:1-15:0--	-0.0399895	0.0260335
PE-17:1-17:0--	0.0528154	0.0105601
PE-17:1-18:0--	0.0228734	-0.0516627
PE-17:1-18:3--	-0.0139338	0.0995363
PE-17:1-20:5--	-0.0515785	0.0259192
PE-18:0-15:0--	0.0548461	0.0105759
PE-18:0-17:0--	0.0551743	0.00130064
PE-18:0-18:2--	0.0483595	0.016037
PE-18:0-18:3--	0.0543044	-0.0126468
PE-18:0-20:2--	0.0537766	-0.010152
PE-18:0-20:3--	0.0547246	-0.0120687
PE-18:0-20:4--	0.0545073	-0.0160715
PE-18:0-20:5--	0.0539051	0.00471652
PE-18:0-21:0--	0.0549301	0.0038181
PE-18:0e-13:0--	-0.0407606	0.0156814
PE-18:0e-15:0--	-0.0543446	0.0126009
PE-18:0e-16:1--	-0.0548436	0.000725075
PE-18:0e-17:1--	-0.0540997	0.0101234
PE-18:0e-18:0--	-0.0332666	-0.0249454
PE-18:0e-18:1--	-0.0545295	0.0123928
PE-18:0e-18:2--	-0.0524753	0.0148841
PE-18:0e-20:5--	-0.0547233	0.0145199
PE-18:1-18:1--	-0.0483321	-0.0223584
PE-18:1-18:2--	-0.0468019	0.00558499
PE-18:1-20:5--	-0.0543428	0.00351989
PE-18:1e-15:0--	-0.0522305	0.0223714
PE-18:1e-16:1--	-0.0545111	-0.00968405
PE-18:1e-17:0--	-0.0404908	0.0482343
PE-18:1e-17:1--	-0.0464821	0.034131
PE-18:1e-18:1--	-0.0497275	0.00444126
PE-18:1e-18:2--	-0.0531889	0.0232177
PE-18:1e-19:1--	-0.0539238	-0.0104712
PE-18:1e-20:2--	-0.0529095	0.0268191
PE-18:1e-20:3--	-0.0417507	0.0359953
PE-18:1e-20:4--	-0.0436568	0.00245497
PE-18:1e-20:5--	-0.0533909	0.0260091
PE-18:2-21:0--	0.0518534	0.00803908
PE-18:2-23:0--	0.0517707	-0.00684453
PE-18:4-18:0--	0.0257639	-0.017391
PE-19:0-20:3--	0.0542295	0.0241161
PE-19:0-20:4--	0.054932	-0.0103897
PE-19:0-20:5--	0.0547143	0.00622218
PE-19:1-17:0--	0.0551117	-0.00134977
PE-19:1-19:0--	0.0551077	0.00108555
PE-19:1-20:3--	0.053051	0.0098335
PE-19:1-20:5--	0.0515498	0.0403146
PE-19:1-21:0--	0.0547957	0.00575401
PE-20:0-17:0--	0.054897	0.00257709
PE-20:0-18:2--	0.0533489	0.0202101
PE-20:0-18:3--	0.05475	-0.00658344
PE-20:0-20:3--	0.0552154	0.00186545
PE-20:0-20:4--	0.054936	-0.00903265
PE-20:0-20:5--	0.0540922	0.0193079
PE-20:1-21:0--	0.0546533	0.0113416
PE-20:2-18:2--	0.0480864	-0.0129442
PE-20:3-21:0--	0.0551572	-0.0056679
PE-20:4-21:0--	0.0551072	-0.00994554
PE-20:5-18:2--	-0.0414255	0.0306784
PE-20:5-20:4--	0.0514996	-0.0392432
PE-20:5-20:5--	-0.0456543	0.00439333
PE-22:0-18:2--	0.0524105	0.025441
PE-22:0-20:4--	0.0549353	-0.00773254
PE-24:0-18:2--	0.0396062	0.010738
PE-26:0-18:2--	0.0487799	0.0269886
PE-26:0-20:3--	0.0506417	-0.00259412
PE-26:0-20:5--	0.0434102	0.0317492
PE-27:0-17:1--	0.0544686	0.00417095
PE-27:0-18:1--	0.0302265	-0.0151012
PE-27:0-18:2--	0.0521088	0.00126858
PE-27:0-20:5--	0.0544219	-0.00842868
PG-18:0-18:1--	-0.0198309	0.134752
PG-20:4-20:4--	-0.00979537	0.121131
PI-16:0-18:1--	0.0458061	-0.0299141
PI-16:0-18:2--	-0.039711	0.012873
PI-16:0-20:5--	-0.0529922	0.0203706
PI-17:0-14:0--	0.0390334	0.0222649
PI-17:0-18:2--	0.0150732	-0.0217646
PI-17:0-20:4--	0.0489957	-0.0373579
PI-17:1-18:0--	0.0495062	-0.0409071
PI-18:0-14:0--	0.0514945	-0.0103096
PI-18:0-17:0--	0.0534758	-0.0108805
PI-18:0-18:1--	0.0511264	-0.0213476
PI-18:0-18:2--	0.0507608	0.00897982
PI-18:0-20:3--	0.0538862	-0.00776923
PI-18:0-20:4--	0.0535697	-0.0219843
PI-18:0-20:5--	0.0525864	0.0157976
PI-18:1-18:2--	-0.0540785	0.00336018
PI-18:1-20:5--	-0.0546181	0.00359352
PI-19:0-20:4--	0.0544352	-0.0145104
PI-19:0-20:5--	0.0545857	-0.00890412
PI-19:1-14:0--	0.0185251	0.0598611
PI-19:1-18:0--	0.0545639	-0.0094842
PI-19:1-18:1--	0.0425527	0.0209208
PI-19:1-18:2--	0.0416229	0.0607838
PI-19:1-19:1--	0.0471532	0.0215937
PI-19:1-20:2--	0.00555628	-0.0111638
PI-19:1-20:3--	0.0528186	0.00236134
PI-19:1-20:5--	0.030703	0.0923419
PI-20:0-14:0--	0.0538226	0.00393602
PI-20:0-20:4--	0.0548664	-0.0120628
PI-20:3-20:5--	0.0418815	-0.000632871
PI-20:5-18:2--	-0.043381	0.0252545
PI-20:5-20:4--	0.0357526	0.00515729
PI-20:5-20:5--	-0.0185736	0.0272714
PI-22:0-20:5--	0.00536284	0.0699944
PS-16:0-20:4--	0.0144522	0.00317086
PS-16:0-20:5--	-0.0508444	0.00735153
PS-17:0-18:2--	-0.0163337	0.0162745
PS-17:0-20:4--	0.0472702	-0.0113021
PS-17:0-20:5--	0.0303337	0.0604357
PS-17:1-17:0--	0.020218	0.100753
PS-17:1-18:0--	8.28592e-05	0.0644667
PS-17:1-20:0--	-0.019128	0.0968887
PS-17:1-20:2--	0.0530078	0.0243603
PS-18:0-18:1--	-0.00692435	0.0968573
PS-18:0-18:2--	0.00410006	0.0532666
PS-18:0-18:3--	0.0325899	-0.0495328
PS-18:0-20:3--	0.0449158	0.00835735
PS-18:0-20:4--	0.0296837	-0.0252464
PS-18:0-20:5--	0.0491105	0.0295801
PS-18:1-18:2--	0.0482182	0.0459604
PS-18:1-20:5--	-0.0521116	0.0180487
PS-19:0-20:4--	0.0516343	-0.0125115
PS-19:1-20:5--	0.00494031	-0.0108706
PS-20:0-18:2--	-0.00594178	0.0489013
PS-20:0-20:3--	0.0498508	-0.00144862
PS-20:0-20:5--	-0.0256193	0.0458434
PS-20:2e-17:0--	-0.0348961	0.0800701
PS-20:2e-18:1--	-0.0430492	0.0565045
PS-20:2e-18:2--	-0.0486438	0.0499153
PS-20:2e-19:1--	-0.0498538	0.0423792
PS-20:2e-20:2--	-0.0490122	0.0542301
PS-20:3e-17:1--	-0.0148177	0.0935018
PS-20:3e-18:2--	-0.0174179	0.100348
PS-20:3e-20:2--	0.0216253	0.0957068
PS-20:3e-20:5--	-0.00624354	0.110313
PS-20:5-18:2--	-0.0101786	0.0478203
PS-20:5-21:1--	0.00665933	0.0878228
PS-22:0-20:3--	-0.0237127	0.0212167
PS-22:0-20:5--	0.0485098	0.0554145
PS-27:0-20:4--	-0.0175136	-0.00397846
SM-d17:1-21:0--	-0.0479013	-0.032245
SM-d18:1-21:0--	-0.0495847	-0.0144575
SM-d18:1-22:0--	0.0196504	-0.0563107
SM-d19:0-18:1--	0.046814	-0.0533838
SM-d20:0-18:1--	0.0486725	-0.0545795
SM-t18:0-17:0--	0.000975673	-0.00312989
SM-t18:1-21:0--	-0.0115916	-0.0163013
SM-t18:1-23:0--	-0.00954329	0.0161574
SM-t18:1-23:3--	0.0447332	0.0451957
TG-11:0-17:1-17:1-	-0.0543926	-0.01618
TG-11:0-20:5-22:6-	-0.0529492	-0.0292345
TG-12:0-14:0-17:1-	-0.0479379	-0.0597745
TG-12:0e-18:1-23:0-	-0.0545255	0.00249831
TG-12:0e-6:0-20:5-	0.0230637	-0.079586
TG-12:1e-20:4-23:0-	-0.0540867	-0.00553398
TG-13:0-17:1-17:1-	-0.0546659	-0.0170234
TG-14:0-17:1-17:1-	-0.0548037	-0.0117552
TG-14:0-17:1-18:2-	-0.0526781	-0.00955787
TG-14:0-18:3-20:5-	-0.0536012	-0.0287947
TG-14:1-14:1-17:1-	-0.0531395	0.0183022
TG-14:1-17:1-17:1-	-0.0529482	-0.00129046
TG-14:1e-20:4-23:0-	-0.0485708	-0.00708006
TG-15:0-10:0-17:1-	-0.0490422	-0.0383361
TG-15:0-13:0-17:0-	0.0188066	-0.0127739
TG-15:0-14:0-15:0-	-0.0499868	-0.0434662
TG-15:0-14:0-16:1-	-0.0528021	-0.0377165
TG-15:0-14:0-17:1-	-0.053746	-0.0245754
TG-15:0-14:0-18:2-	-0.0520867	-0.0230269
TG-15:0-15:0-16:1-	-0.0515033	-0.0296344
TG-15:0-15:0-17:0-	0.0511497	-0.0173103
TG-15:0-15:0-17:1-	-0.0520615	-0.0343444
TG-15:0-16:0-17:0-	0.047755	-0.0112607
TG-15:0-16:0-17:1-	-0.0542855	-0.0138931
TG-15:0-16:0-18:2-	-0.0461182	-0.00801401
TG-15:0-16:1-17:0-	-0.0534285	-0.0182757
TG-15:0-16:1-17:1-	-0.0534537	-0.0224486
TG-15:0-16:1-18:1-	-0.0542196	-0.0264855
TG-15:0-17:0-17:0-	0.0538323	0.00242134
TG-15:0-17:0-17:1-	-0.0140075	-0.0585228
TG-15:0-17:0-18:1-	-0.0510231	-0.0134507
TG-15:0-17:0-19:0-	0.0543994	0.00352628
TG-15:0-17:1-17:1-	-0.00551387	0.0270443
TG-15:0-17:1-18:1-	-0.0535366	-0.021239
TG-15:0-18:1-18:1-	-0.0545955	-0.0183264
TG-15:0-18:2-20:5-	-0.0265708	0.0133612
TG-15:0-18:3-20:5-	-0.0494361	-0.0516608
TG-15:0-20:5-20:5-	-0.0324034	-0.059201
TG-15:0-6:0-18:1-	-0.0377977	-0.0710796
TG-15:0-9:0-18:1-	-0.0444513	-0.0803978
TG-16:0-14:0-17:0-	-0.0340508	0.00461812
TG-16:0-17:0-18:1-	0.0473432	-0.0175139
TG-16:0-20:4-20:5-	0.017146	-0.123912
TG-16:0-20:5-20:5-	-0.048967	-0.063622
TG-16:0-6:0-17:1-	0.0510607	-0.0454685
TG-16:0-6:0-18:1-	-0.0444687	-0.0531822
TG-16:1-14:1-16:1-	-0.0456347	-0.0474259
TG-16:1-14:1-17:1-	-0.0551199	0.00164124
TG-16:1-16:1-18:3-	-0.0521873	-0.0278376
TG-16:1-17:1-17:1-	-0.0491847	0.00725219
TG-16:1-18:1-18:1-	-0.0259136	0.00527816
TG-16:1-18:2-18:2-	-0.0480026	-0.0703996
TG-16:1-18:2-20:5-	-0.0454943	-0.0748595
TG-16:1-6:0-17:1-	0.0414697	-0.0474232
TG-17:0-17:0-18:1-	-0.0399461	-0.0266962
TG-17:0-17:1-17:1-	-0.0381738	-0.055716
TG-17:0-17:1-18:1-	-0.0541578	-0.0201392
TG-17:0-18:2-20:3-	-0.0490573	-0.00983407
TG-17:0-19:0-22:0-	0.0538627	0.00291913
TG-17:0-20:4-20:5-	0.0303466	-0.118751
TG-17:0-22:0-22:0-	0.0542656	-0.00309769
TG-17:1-17:1-17:1-	-0.0540587	-0.0149439
TG-18:0-14:0-17:0-	0.0401443	-0.0501661
TG-18:0-15:0-17:0-	0.0541073	-0.00468144
TG-18:0-15:0-17:1-	-0.011253	-0.077118
TG-18:0-16:0-16:0-	-0.0391442	-0.0547657
TG-18:0-16:0-17:0-	0.052989	-0.0145289
TG-18:0-16:0-17:1-	-0.00994683	-0.0895071
TG-18:0-16:0-18:1-	0.0514326	-0.0387834
TG-18:0-17:0-17:0-	0.0544183	-0.0162969
TG-18:0-17:0-18:1-	0.0521597	-0.0288595
TG-18:0-17:0-20:0-	0.053302	-0.0313711
TG-18:0-17:1-17:1-	-0.00670293	-0.0973588
TG-18:0-17:1-18:0-	0.0535949	-0.0295512
TG-18:0-17:1-18:1-	0.0445154	-0.0500048
TG-18:0-17:1-18:2-	0.046956	0.018894
TG-18:0-17:1-19:0-	0.0517497	-0.0410338
TG-18:0-17:1-20:4-	0.0524906	-0.0223847
TG-18:0-17:1-20:5-	0.0441553	-0.0680203
TG-18:0-17:1-21:0-	0.050955	-0.0336568
TG-18:0-17:1-22:0-	0.0541571	-0.028652
TG-18:0-18:0-20:0-	0.0541459	-0.0158939
TG-18:0-18:0-20:3-	0.0447752	0.00371288
TG-18:0-18:0-20:5-	0.0544994	-0.0211477
TG-18:0-18:0-21:0-	0.0544814	-7.42529e-06
TG-18:0-20:0-20:5-	0.0386887	0.0226706
TG-18:0-20:3-20:5-	0.0524646	-0.0153047
TG-18:0-20:4-20:5-	0.0485522	-0.0645789
TG-18:0-20:5-20:5-	0.0447731	-0.0813191
TG-18:0-6:0-20:4-	0.0403303	0.0237592
TG-18:0e-15:0-18:1-	-0.0545251	0.00660238
TG-18:0e-16:0-18:1-	-0.0541919	0.0106204
TG-18:0e-17:1-17:1-	-0.0536859	-0.0038532
TG-18:0e-17:1-18:0-	-0.0541807	-0.00711342
TG-18:0e-17:1-18:1-	-0.0545807	-0.00374758
TG-18:0e-18:0-18:1-	-0.0548973	-0.0019279
TG-18:0e-18:1-18:1-	-0.0543541	-0.00437254
TG-18:0e-18:1-20:4-	-0.0341007	-0.0458397
TG-18:0e-18:2-19:1-	-0.0541123	0.00416328
TG-18:0e-19:1-20:3-	-0.051703	0.00355206
TG-18:1-17:1-17:1-	-0.0545252	-0.0151992
TG-18:1-17:1-18:1-	-0.0536751	-0.0160017
TG-18:1-18:1-18:1-	-0.0278794	-0.017233
TG-18:1-18:1-18:2-	-0.0546966	-0.0111031
TG-18:1-18:2-20:5-	-0.0530054	-0.028586
TG-18:1-20:3-20:5-	-0.0380301	-0.0722659
TG-18:2-11:1-14:4-	0.0191316	-0.0472803
TG-18:2-13:0-17:1-	-0.0529997	-0.0212405
TG-18:2-17:1-17:1-	-0.0521642	-0.00604209
TG-18:2-17:1-18:2-	-0.0531756	-0.0103202
TG-18:3-14:1-17:1-	-0.0541532	-0.0116008
TG-18:3-17:1-17:1-	-0.0471515	-0.0685443
TG-18:3-17:1-18:2-	-0.0535133	-0.0212958
TG-18:3-17:1-20:5-	-0.0333494	-0.108329
TG-18:3-18:2-20:5-	-0.0425767	-0.0597743
TG-18:3-20:5-20:5-	-0.0163502	-0.128071
TG-18:4-18:0-18:0-	0.0221196	0.0567655
TG-18:4-20:5-20:5-	-0.0333765	-0.0958521
TG-19:0-20:4-20:5-	0.0441309	-0.0264665
TG-19:1-11:1-14:4-	0.0496564	-0.0207882
TG-19:1-17:1-17:1-	0.0291848	-0.0564731
TG-19:1-17:1-18:0-	0.0531244	-0.0319444
TG-19:1-17:1-18:2-	-0.0202604	0.0128972
TG-19:1-17:1-19:1-	0.0307238	0.048039
TG-19:1-18:0-20:3-	0.0449741	-0.0137029
TG-19:1-18:0-21:0-	0.0503464	-0.0432575
TG-19:1-18:1-20:3-	-0.0513551	-0.0162289
TG-19:1-18:2-19:1-	-0.0134932	-0.00508163
TG-19:1-18:2-20:4-	0.0150713	-0.0304053
TG-19:1-18:2-20:5-	-0.0113091	-0.0991257
TG-19:1-18:2-22:0-	0.0417217	-0.0424237
TG-19:1-19:1-20:2-	0.0381161	-0.0326682
TG-19:1-20:3-20:4-	0.0419314	-0.0256537
TG-19:1-20:4-20:5-	0.0253074	-0.0942346
TG-19:1-20:5-20:5-	0.0195763	-0.104413
TG-19:1-20:5-22:0-	0.0525224	-0.01544
TG-19:1-6:0-17:1-	-0.040262	-0.0852956
TG-20:0-20:5-20:5-	0.0502335	-0.0508093
TG-20:3-17:1-17:1-	0.00114364	-0.106739
TG-20:3-20:5-20:5-	0.0386418	-0.105136
TG-20:5-14:2-17:1-	-0.0508194	-0.0392717
TG-20:5-17:1-18:2-	-0.0488172	-0.0403679
TG-20:5-17:1-20:4-	-0.00853964	-0.135941
TG-20:5-17:1-20:5-	-0.0493692	-0.0585957
TG-20:5-18:2-20:5-	-0.0298277	-0.0901582
TG-20:5-20:4-20:5-	0.0195094	-0.0763334
TG-22:0-18:2-20:5-	0.0491584	-0.0196192
TG-22:0-20:3-20:5-	0.0508224	-0.0322445
TG-27:0-17:1-17:1-	0.0485358	-0.0538326
TG-27:0-18:2-19:1-	0.0404812	-0.0116852
TG-27:0-19:1-19:1-	0.0543287	-0.0254032
TG-4:0-18:0-19:1-	0.0526249	-0.0330969
TG-4:0-18:1-18:2-	-0.040533	-0.0225613
TG-6:0-14:0-17:1-	0.0463072	-0.0443725
TG-6:0-17:1-18:2-	-0.0524627	-0.0224004
TG-6:0-18:1-18:2-	-0.0117447	0.0378716
TG-9:0-17:1-17:1-	-0.0533511	-0.028124
