# Supplementary material for: A lipid droplet-peroxisome network drives longevity by monounsaturated fatty acids via modulating ether lipid synthesis and ferroptosis
Source: Research Square preprint supplement (doi:10.21203/rs.3.rs-740521/v1), 2021-08-13
Supplement: Supplementary file 10 [file 7045899bca5669efbcd5579d.xlsx]

## Sheet: Sheet1
Extended Data Table 7 Fatty acid length in all lipids
Carbon chain length fatty acid	ash-2 RNAi #10	ash-2 RNAi #14	ash-2 RNAi #18	ash-2 RNAi #2	ash-2 RNAi #22	ash-2 RNAi #6	Control #1	Control #13	Control #17	Control #21	Control #5	Control #9	prx-5/ash-2 RNAi #11	prx-5/ash-2 RNAi #15	prx-5/ash-2 RNAi #19	prx-5/ash-2 RNAi #23	prx-5/ash-2 RNAi #3	prx-5/ash-2 RNAi #7	prx-5 RNAi #12	prx-5 RNAi #16	prx-5 RNAi #20	prx-5 RNAi #24	prx-5 RNAi #4	prx-5 RNAi #8	Mean ash-2 RNAi	Mean control	Mean prx-5/ash-2 RNAi	Mean prx-5 RNAi	CV ash-2 RNAi	CV control	CV prx-5/ash-2 RNAi	CV prx-5 RNAi	Fold change control vs ash-2 RNAi	Fold change prx-5 vs prx-5/ash-2 RNAi	Fold change control vs prx-5 RNAi	Fold change control vs prx-5/ash-2 RNAi	P-value control vs ash-2 RNAi	P-value prx-5 vs prx-5/ash-2 RNAi	P-value control vs prx-5/ash-2 RNAi	P-value control vs prx-5 RNAi	P-adjust control vs ash-2 RNAi	P-adjust prx-5 vs prx-5/ash-2 RNAi	P-adjust control vs prx-5/ash-2 RNAi	P-adjust control vs prx-5 RNAi
10	63.361	34.1172	55.8047	42.3747	40.2275	38.4576	29.8087	21.1235	20.1803	40.7084	16.9844	20.3581	8.14338	8.68707	6.20329	9.15253	3.84525	9.01537	3.28577	8.88108	13.4459	8.99297	11.904	8.81577	45.7238	24.8606	7.50781	9.22092	0.247751	0.356985	0.278682	0.377575	1.83921	1.22818	0.370905	0.301997	0.0151515	0.393939	0.0021645	0.0021645	0.030303	0.606061	0.00309215	0.00270563
12	667.313	577.399	602.178	712.762	655.663	702.8	510.705	624.31	568.242	567.702	527.105	540.907	466.966	571.785	517.388	436.421	610.431	527.049	454.221	406.36	509.8	418.676	618.562	422.442	653.019	556.495	521.673	471.677	0.0826416	0.072174	0.123331	0.1718	1.17345	0.904162	0.847584	0.937426	0.00865801	0.179654	0.393939	0.0411255	0.021645	0.359307	0.393939	0.045695
14	7970.44	7808.58	7968.5	8799	8513.49	7733.89	7109.69	7569.87	7209.76	7608.1	6426.25	7058.5	3689.82	4209.22	4067.58	3895.2	4223.95	3979.79	4055.77	4042.95	4402.04	4053.27	4036.15	3822.89	8132.32	7163.7	4010.93	4068.84	0.0523537	0.0599569	0.0505306	0.0458036	1.13521	1.01444	0.567981	0.559896	0.0021645	0.937229	0.0021645	0.0021645	0.00721501	0.937229	0.00309215	0.00270563
16	13419.7	13025.7	14146.3	15006.3	14767.4	13278.4	11035.6	11825.2	12109.9	12439.2	9986.48	10844.3	4484.53	5090.42	4680.39	4348.96	5100.58	4649.4	6020.33	3808.01	6265.31	6214.53	6096.31	5673.13	13940.6	11373.5	4725.71	5679.6	0.0592273	0.0805843	0.0656686	0.165576	1.22572	1.20185	0.499374	0.415504	0.0021645	0.0649351	0.0021645	0.0021645	0.00721501	0.324675	0.00309215	0.00270563
18	204677	206497	207570	222601	234966	202569	194022	205238	203652	208490	179932	190841	161680	181708	175202	161821	178029	166838	185360	191018	203682	184704	183241	186542	213147	197029	170880	189091	0.0602433	0.0547694	0.0503466	0.0403086	1.0818	1.10658	0.959714	0.867283	0.0930736	0.0021645	0.004329	0.24026	0.155123	0.021645	0.00481	0.24026
20	66722.9	63551.8	65081.4	69783.8	70638.1	66831.8	65397.4	67884.4	65024.2	67454.5	67795.7	62097.8	81332.2	90730.7	94416	81033	96699.2	89056.9	83586.6	82239.9	89338.5	82205.2	87125.4	84461.2	67101.6	65942.3	88878	84826.1	0.0403196	0.0341888	0.0735722	0.0337066	1.01758	0.954411	1.28637	1.34781	0.699134	0.484848	0.0021645	0.0021645	0.776816	0.606061	0.00309215	0.00270563
22	1029.22	1030.46	1006.09	1002.14	1118.78	1096.5	993.244	1220.36	1075.51	1172.66	1051.89	1172.8	2042.98	2311.29	2138.18	1885.49	2117.31	2118.58	2286.93	2028.04	2262.88	2061.68	2213.96	2210.55	1047.2	1114.41	2102.31	2177.34	0.0465437	0.0783621	0.0659051	0.0492253	0.939685	1.03569	1.9538	1.88647	0.24026	0.484848	0.0021645	0.0021645	0.343228	0.606061	0.00309215	0.00270563
24	112.363	77.1558	110.792	102.192	115.223	115.064	148.847	161.616	136.078	156.844	173.636	172.874	276.124	279.84	339.094	285.349	302.671	277.63	305.418	233.852	340.316	354.597	257.174	312.296	105.465	158.316	293.451	300.609	0.139059	0.0912678	0.0830498	0.155989	0.666169	1.02439	1.89879	1.85358	0.0021645	0.588745	0.0021645	0.0021645	0.00721501	0.654161	0.00309215	0.00270563
26	7.4366	14.7548	7.63065	7.73952	7.6732	12.7446	6.25937	8.44609	8.42262	8.57373	8.02868	9.10607	12.1069	14.0454	19.2434	13.1953	15.0066	34.9962	25.8298	31.3728	26.9641	16.3198	17.3511	32.7824	9.66323	8.13943	18.099	25.1033	0.334271	0.120929	0.477072	0.275708	1.18721	1.387	3.08416	2.22362	0.818182	0.132035	0.0021645	0.0021645	0.818182	0.359307	0.00309215	0.00270563
4	39.7165	34.505	38.9763	56.2756	38.5511	43.6253	37.1815	47.9379	36.8354	39.901	31.6137	36.4723	60.141	63.1936	52.7337	44.2812	64.9355	62.0924	57.0541	67.6338	71.585	64.3497	80.3798	54.367	41.9416	38.3236	57.8962	65.8949	0.181217	0.141432	0.136502	0.145347	1.09441	1.13816	1.71943	1.51072	0.393939	0.179654	0.004329	0.0021645	0.492424	0.359307	0.00481	0.00270563
